# Supplementary material for: Analysis of High Molecular Mass Compounds from the Spider Pamphobeteus verdolaga Venom Gland. A Transcriptomic and MS ID Approach
Source: MDPI journal article supplement (doi:10.3390/toxins13070453), 2021-06-29
Supplement: s1 [file s1]

# Supplementary Materials: Analysis of High Molecular Mass Compounds from the Spider *Pamphobeteus verdolaga* Venom Gland. A Transcriptomic and MS ID Approach

Sebastian Estrada-Gomez, Leidy Johana Vargas-Muñoz, Cesar Segura Latorre, Monica Maria Saldarriaga-Cordoba and Claudia Marcela Arenas-Gómez

**Section S1.** Full-length translated sequences for putative protein ORFs corresponding to phospholipases A<sub>2</sub>, phospholipases D, phospholipases B, kunitz-type, hyaluronidases, lycotoxins toxins, CRISP proteins, Hephaestin-like protein and venom metalloproteinase.

**Pairwise alignments and amino acid sequences of phospholipases A<sub>2</sub> translated from *Pamphobeteus verdolaga*.** Residues highlighted in grey indicate the signal peptide, while magenta blue highlighted residues, indicates the propeptide according to Spider|ProHMM from the arachnoserver. Residues highlighted in yellow shows cysteines potentially forming disulfide bridges.

## PhospholipaseA<sub>2</sub>-1-Pverdolaga:

XLGTGKSPVVAVETIDVFRPDSLWDA<sup>CM</sup>KMVALGVSAIGQLLIDQATQTDGRVIGRAQAM<sup>CS</sup>MLNIPYYRLNPQLTENVGDLTDDNKTTLVKMLWETTAYMHSMRQELEQL<sup>C</sup>NNYEDSGLD

CLUSTAL O(1.2.4) multiple sequence alignment

|                                                                   |                                                                                                                                            |            |
|-------------------------------------------------------------------|--------------------------------------------------------------------------------------------------------------------------------------------|------------|
| A0A087UHX4_Ca-ind_PLA2_(Fragment)<br>PhospholipaseA2-1-Pverdolaga | MVLIQ <sup>ML</sup> DELERILGKPVVQHFDLIA <sup>GT</sup> STGGILALVLATGKSMKE <sup>CL</sup> YFRLKDKVFV                                          | 60<br>0    |
| A0A087UHX4_Ca-ind_PLA2_(Fragment)<br>PhospholipaseA2-1-Pverdolaga | GTRPYDADLLESFLKKELGESTVMGDI <sup>EP</sup> KIMITATRGDRKPADLHIFRNYKSPLEILN                                                                   | 120<br>0   |
| A0A087UHX4_Ca-ind_PLA2_(Fragment)<br>PhospholipaseA2-1-Pverdolaga | HIEKDILTNEPLNP <sup>EQ</sup> LIWQAARATGAAPTYFRASGPYIDGGLISNNPTLDALTEIHQ                                                                    | 180<br>0   |
| A0A087UHX4_Ca-ind_PLA2_(Fragment)<br>PhospholipaseA2-1-Pverdolaga | CNQSLTAVGKRDQVCKIKVIVSMGTGRPPLVAVDTIDVFRPDSLWGA <sup>CRM</sup> -ALGVTNLGQ<br>-----X <sup>LG</sup> TGKSPVVAVETIDVFRPDSLWDACKMVALGVSAIGQ     | 239<br>39  |
| A0A087UHX4_Ca-ind_PLA2_(Fragment)<br>PhospholipaseA2-1-Pverdolaga | LLVDQATQTDGRV <sup>TAR</sup> ALAVCGMLNIPYFRLNPQLTENVALDETNTKTLVKMLWETTAYM<br>LLIDQATQTDGRVIGRAQAMCSMLNIPYYRLNPQLTENVGDLTDDNKTTLVKMLWETTAYM | 299<br>99  |
| A0A087UHX4_Ca-ind_PLA2_(Fragment)<br>PhospholipaseA2-1-Pverdolaga | RCMKDELEELKKLLTT----<br>HSMRQELEQLC <sup>NN</sup> YEDSGLD                                                                                  | 315<br>119 |

## PhospholipaseA<sub>2</sub>-2-Pverdolaga:

MAAESVADDVLR<sup>CC</sup>VNLSSEFRDFY<sup>C</sup>PYDIPSV<sup>EG</sup>PPTPLEFARNWVSPNKPVIFRNAVKHWP  
ALKKWTVSYLR

## CLUSTAL O(1.2.4) multiple sequence alignment

|                                                                           |                                                                                                                                                                           |            |
|---------------------------------------------------------------------------|---------------------------------------------------------------------------------------------------------------------------------------------------------------------------|------------|
| XP_003214621.2_cytosolic_PLA2_(predicted)<br>PhospholipaseA2-2-Pverdolaga | MAEAAVEAVRRCLASFEEARELCFPEVPYLDSPPSPLQFFREWCPNKPCVIRNAF<br>-MAAESVADDVLRCCVNLSEFRDFYCPYDIPSVEGPPTLEFARNWVSPNKPVIFRNAV<br>**::: * ** ::: * *: * : * : :*: *: *: *: *: *: * | 60<br>59   |
| XP_003214621.2_cytosolic_PLA2_(predicted)<br>PhospholipaseA2-2-Pverdolaga | NHWPALKRWTLDYLRREIMGEKLVSAVTPNGYADAVYQDWFMPEERLTPFSAFLDILEK<br>KHWPALKKWTVSYLK<br>:*****: *: *                                                                            | 120<br>74  |
| XP_003214621.2_cytosolic_PLA2_(predicted)<br>PhospholipaseA2-2-Pverdolaga | KVTSPGVFYVQKQCSNLTEEFPELMDLLEPEIPWMSEALGKKPDVNFNLGESAATSLH<br>-----                                                                                                       | 180<br>74  |
| XP_003214621.2_cytosolic_PLA2_(predicted)<br>PhospholipaseA2-2-Pverdolaga | KDHYENLYCVISGEKHFLHPSPDRPFIPHELYPPATYHISEDGNFIVMDKMSKVPWI<br>-----                                                                                                        | 240<br>74  |
| XP_003214621.2_cytosolic_PLA2_(predicted)<br>PhospholipaseA2-2-Pverdolaga | PLDPLNPDLERYPEYAKAKPLRQCTVKSGEMLYLPSLWFFHHVQQSHGCIANVWYDMEDYL<br>-----                                                                                                    | 300<br>74  |
| XP_003214621.2_cytosolic_PLA2_(predicted)<br>PhospholipaseA2-2-Pverdolaga | KYSYVQLDLSLTAMTPTYADTMILYLRQYPQWGIHSYGEVDSLPLSCKGTGVQYLEVY<br>-----                                                                                                       | 360<br>74  |
| XP_003214621.2_cytosolic_PLA2_(predicted)<br>PhospholipaseA2-2-Pverdolaga | GFHIIERTNYFNALKRFLPLPSIFHAMATQMPMVGTFFCYTLFVKIIQARHIPARDLWS<br>-----                                                                                                      | 420<br>74  |
| XP_003214621.2_cytosolic_PLA2_(predicted)<br>PhospholipaseA2-2-Pverdolaga | FSDCYVTLWLSTSKKAVTKTISNTSNPVWNEFQFVIQTQVKNVLEKLKYDEDDVTKD<br>-----                                                                                                        | 480<br>74  |
| XP_003214621.2_cytosolic_PLA2_(predicted)<br>PhospholipaseA2-2-Pverdolaga | DLIFIVTYDISKVKPGETIQENFTLNAGPESLEVEFKMEKICCGFEQIITNDILVAREV<br>-----                                                                                                      | 540<br>74  |
| XP_003214621.2_cytosolic_PLA2_(predicted)<br>PhospholipaseA2-2-Pverdolaga | SCLEIQMDKGNETCKEHNIELVWNEFEEAEKINQDSEAFQFHYVKNGEPIKAKLK<br>-----                                                                                                          | 600<br>74  |
| XP_003214621.2_cytosolic_PLA2_(predicted)<br>PhospholipaseA2-2-Pverdolaga | SNFFKEKFLGDTPAHSHVLLKTLPLEEETEVALSITENAEKLQLKVNDCLGDLDRLEEC<br>-----                                                                                                      | 660<br>74  |
| XP_003214621.2_cytosolic_PLA2_(predicted)<br>PhospholipaseA2-2-Pverdolaga | DLCAAEQDFLCKRKKHVARALENLLQKLNHEVPVIAVMATGGGARAMSAFYGHLSALQ<br>-----                                                                                                       | 720<br>74  |
| XP_003214621.2_cytosolic_PLA2_(predicted)<br>PhospholipaseA2-2-Pverdolaga | KLNLDCITYLCGASGSTWTMRSLYEDNDWSQKDLIGPIHKAQGHIVRNKSNVFSLEALQ<br>-----                                                                                                      | 780<br>74  |
| XP_003214621.2_cytosolic_PLA2_(predicted)<br>PhospholipaseA2-2-Pverdolaga | FYDQELRRRRQEGYSVSFTDMWLIIDRMFHDESNKSLDQQQAVNKGQNPLPLYVALNV<br>-----                                                                                                       | 840<br>74  |
| XP_003214621.2_cytosolic_PLA2_(predicted)<br>PhospholipaseA2-2-Pverdolaga | KEDAQTTFEFKENCEFSPYEVGFSGYGAIRSEDFGSEFYMGATDEDKPESRICFLEGIW<br>-----                                                                                                      | 900<br>74  |
| XP_003214621.2_cytosolic_PLA2_(predicted)<br>PhospholipaseA2-2-Pverdolaga | SNIFSLNLVDVWNLVQLWQWPFSGQEEDNSKGSTSTTQVSEYHATCDTPSIFHGLTRRP<br>-----                                                                                                      | 960<br>74  |
| XP_003214621.2_cytosolic_PLA2_(predicted)<br>PhospholipaseA2-2-Pverdolaga | IGEGKPNFLRGLQHLKDYQNKSFSGWQDSYLDQLPNHLTPLEKELCLVDAGYINTSFP<br>-----                                                                                                       | 1020<br>74 |
| XP_003214621.2_cytosolic_PLA2_(predicted)<br>PhospholipaseA2-2-Pverdolaga | PLLKERNVDVVISLDYHLMETKFKSIENMSKYCIDQKIPFPKIVLTEERSNPKCYLF<br>-----                                                                                                        | 1080<br>74 |
| XP_003214621.2_cytosolic_PLA2_(predicted)<br>PhospholipaseA2-2-Pverdolaga | EDKENPEAPIILHFLVNGSFKEYRKPQIKRKSAAKFEGEVLDSSMSPYKMTDLYTSD<br>-----                                                                                                        | 1140<br>74 |
| XP_003214621.2_cytosolic_PLA2_(predicted)<br>PhospholipaseA2-2-Pverdolaga | EFNKLKSLCDYNIQNNELILQALWSAIEGGNISKL<br>-----                                                                                                                              | 1176<br>74 |

## PhospholipaseA2-3-Pverdolaga:

MLSLSTHSRFVVSFTLLSLLISSTTSYRIPKRSVRPSPVIFVPGDGGSQLQAKLNKPETVHYYCN

KKTDYYFDLWLNLELLVPYVLD**C**WIDNMRLIYDNVTRKTTNAPGVDIRVPFGNTSTVEWLD  
PSQIAPSAFYFVRIVQGLVDEGYTRGVLDKGAPYDYRKAPNEMANYYKNVKQMTEEMYFKLN  
KTRITYV**C**HSMG**C**PVMLYFFNRQTQDWKDDTHVKALITLGGAWGGAVKAMKAFASGENLGV  
YVINHLLLRKEQRTSPSLAYMTPSDFWKKDEILVVTEKQNYTIGNYYDFFQDIRFPVGVEMW  
KDTYNLTRDLIPPGVEVH**C**MHG VNVSTIERLVYKHLEFPDSNPTLIQGDGDGTVNLRSLEG**C**L  
RWKGNOKOKVVHKPLNNVDHMGVLYDDDVIQYIKOVSS

CLUSTAL O(1.2.4) multiple sequence alignment

| Accession                            | Protein Name                 | Sequence                                                                                                                        | Length |
|--------------------------------------|------------------------------|---------------------------------------------------------------------------------------------------------------------------------|--------|
| A0A087U096_Group_XV_PLA2_ (Fragment) | PhospholipaseA2-3-Pverdolaga | MFISCNVSVLAAGVWFLAFLRLHVTANHLLNRADRHSPVLVPDGGGSLAKLDPKEI<br>MLSLSTHSRFVWSVFTLLSLLSISSTYSRIPKRSVRPSPVIFVPGDGGSQLAKLNKPEI         | 60     |
| A0A087U096_Group_XV_PLA2_ (Fragment) | PhospholipaseA2-3-Pverdolaga | VHYFCNRKKTENYFSLWLNLELLVPYVVDWVDNMRMRYVDNETRTSSNSPGVDIRVPGFGN<br>VHYCYCNKKTIDYFDFLWLNLELLVPYVLDGWIDNMRLLYDNYTRKTTNAPGVDIRVPGFGN | 120    |
| A0A087U096_Group_XV_PLA2_ (Fragment) | PhospholipaseA2-3-Pverdolaga | TTSVDWLDPDSQISPAYFVNIIDMLVTQGYTRGVDRGAPYDFRKAPNEMTDYFKRLKNL<br>TSTVEWLDPDSQIAPSAFYFRIVQGLVDEGYTRGVDLKGAPYDYRKAPNEMANYNKKVQKM    | 180    |
| A0A087U096_Group_XV_PLA2_ (Fragment) | PhospholipaseA2-3-Pverdolaga | TEDTYEKNISQTKVTFICHSMGCPIMSYFFNQQTQAWKDEYIKALVSLGGAWGGAVKAMKT<br>TEEMYFKLNKTRITTYVCHSMGCPVMLYFFNRQTQDWKDTHTVKALITLGGAWGGAVKAMKA | 240    |
| A0A087U096_Group_XV_PLA2_ (Fragment) | PhospholipaseA2-3-Pverdolaga | FTSGENLGVFVISQTNVRKEQRTCPSLAYMMPDLLWGKDEILMITANKNYTVSNYYEFF<br>FASGENLGVYVIHLLRKEQRTSPSLAYMTPSDTFWKKDEILVVTETKQNYTIGNYYDDF      | 300    |
| A0A087U096_Group_XV_PLA2_ (Fragment) | PhospholipaseA2-3-Pverdolaga | QDIDFPVGYEIKDYTRYARTGLSPPGVEVHCLHGLNVTDTVKLDFRNTSHFPDNPCLI<br>QDIRFPVGWEMWKDNYNLTR-DLIPPGVEVHCHMGVNVST-IERLVYKHLFEPDSNPTLI      | 360    |
| A0A087U096_Group_XV_PLA2_ (Fragment) | PhospholipaseA2-3-Pverdolaga | YGDGDGTVMNVRSLRACLQWGQKQKQVNVHAATYVNDHMGILADAHVLEYIKNVVHQQ<br>QGSDGDGTVMNLRSLLEGCLRWKGNQKQKVNVHKLNNVDHMGVLYDDVDYIQKQVSS-        | 417    |

### PhospholipaseA<sub>2</sub>-4-Pverdolaga:

XFVNNIC<sup>1</sup>TSSVLDTRKGAGLILNPLRGLSLIP<sup>2</sup>C<sup>3</sup>FNFS<sup>4</sup>PFSP<sup>5</sup>TSPSDDMLFKGLTEAVPTQSKTLY  
LVDGGLTFENLPFPLLLRPORGIDVYLAFDFSSRDADH

CLUSTAL O(1.2.4) multiple sequence alignment

|                                      |                                                              |     |
|--------------------------------------|--------------------------------------------------------------|-----|
| A0A087UL94_Cytosolic_PLA2_(Fragment) | MLNPGFWKDFINNIFTSSVLDRKGAGRVFNPLRGLSLIPCFPFSPFSPSPTSDNTLFK   | 60  |
| PhospholipaseA2-4-Pverdolaga         | -----X FVNINICTSSVLDRKGAGGLTLNPLRLGSLIPCFFNFSPFSPSPTSDDDMLFK | 52  |
|                                      | *:*:* *:*:*:*:*:*:*:*:*:*:*:*:*:*:*:*:*:*:*:*:*:             |     |
| A0A087UL94_Cytosolic_PLA2_(Fragment) | GLTEPAPTNSKTYLVLDGGLTFNLFPPLLRSQRAVDIYISDFSSREHDSPPFKELL     | 120 |
| PhospholipaseA2-4-Pverdolaga         | GLTEAVPTQS KTYLVLDGGLTFNLFPPLLRPQRIGDIVLYAFDSSRRADH-----     | 103 |
|                                      | *:*:* *:*:*:*:*:*:*:*:*:*:*:*:*:*:*:*:*:*:*:*:*:             |     |
| A0A087UL94_Cytosolic_PLA2_(Fragment) | SEKWARLNNCLFPPIHDLAEEYIKHPKCEYVFKDPV                         | 157 |
| PhospholipaseA2-4-Pverdolaga         | -----                                                        | 103 |

### PhospholipaseA<sub>2</sub>-5-Pverdolaga:

XPSQSKKCTCSFDCSGGDSMEIVPQNCRVLCQLDGGGIRGLVLIQLLDQLEKVLGIPVNLQFDWI  
AGTSTGGVLALLLAQGKSVKECRCLYFRLKDRVFVGMRPYDAEPLKILQKELGYETMMSDV  
TGARVMVTATKSDRHPAELHVFERNYDSPMEILTQEDLDPFHNTPLPKPSEQLVWKVARATGS  
APTYFRAFGAFLDGGGLISNNPTLDALTEIHOQNOAYRVTHOEKIKEIDX

## CLUSTAL O(1.2.4) multiple sequence alignment

|                                   |                                                             |     |
|-----------------------------------|-------------------------------------------------------------|-----|
| A0A087UHX4_Ca-ind_PLA2_(Fragment) | -----MVLIQMLDELEIRILGKPVVQH                                 | 21  |
| PhospholipaseA2-5-Pverdolaga      | XPSQSKKCTCSFDCSGGDSMEIVPQNCRLCLDGGGIRGLVLIQLLDQLEKVLGIPVNL  | 60  |
|                                   | *****                                                       |     |
| A0A087UHX4_Ca-ind_PLA2_(Fragment) | FDLIAGTSTGGILALVLATGKSMKECRCLYFRLKDKVFGTRPYDADLLESFLKKELGES | 81  |
| PhospholipaseA2-5-Pverdolaga      | FDWIAGTSTGGVLALLAQGKSVKECRCLYFRLKDRVFGMRPYDAEPLKILQKELGYE   | 120 |
|                                   | *****                                                       |     |
| A0A087UHX4_Ca-ind_PLA2_(Fragment) | TVMGDIEKPKIMITATRGDRKPADLHIFRNYKSPLEILNHIEKDILTNEPLNPREQLIW | 141 |
| PhospholipaseA2-5-Pverdolaga      | TMMSDVTGARVMVTATKSDRHPAELHVFNRNYDSPEILTQEDLPFHNTPLPKPSEQLW  | 180 |
|                                   | *****                                                       |     |
| A0A087UHX4_Ca-ind_PLA2_(Fragment) | QAAATGAAPTYYFRASGPYIDGGILSNPTLDALTEIHQCNSLTAVGKRQVCKIKVIV   | 201 |
| PhospholipaseA2-5-Pverdolaga      | KVARATGSAPTYYRAFGAFLDGGILSNPTLDALTEIHQCNSQAYRVTHQEKIKED--   | 238 |
|                                   | *****                                                       |     |
| A0A087UHX4_Ca-ind_PLA2_(Fragment) | SMGTGRPLVAVDTIDVFRPSLWAGACRMALGVTNLGLLDVQATQTDGRVTRALAVCG   | 261 |
| PhospholipaseA2-5-Pverdolaga      | -----                                                       | 238 |
| A0A087UHX4_Ca-ind_PLA2_(Fragment) | MLNIPYFRLNPQLTENVALDETNTKTLVKMLWETTAYMRCKDELEELKKLLTT       | 315 |
| PhospholipaseA2-5-Pverdolaga      | -----                                                       | 238 |

## PhospholipaseA2-6-Pverdolaga:

MTICTSNSKYLFLVLQILWILPFLA FNVKRWANNSDDCNYDLQVENDGPVTLDPITFYAVLE  
 CAAEEHYVYIFQDNAVPPHRIQVDGSTGANVSFVYNANIYRPGVYILKVSFSGMWSPVLVG  
 IASTSTFVISEYIPGSLNISDIKVRNQGGSLYISSGSVTNLTINLHYPSSVYPLLETSSYWNVEKDQ  
 FITVDPFIYNFTQPGTYRISVSAVARVPVYNVLAVPTQIMKYKWGYFNTVATVKDSMTAVNLT  
 GNTYLKHGQLNLNLDVSC TSGSPFEYCWKIFQPFENVTDLT CPSPIVTTKCSFPIIYFQESGNYQ  
 VAILVDNYITSIQRNIEVHVYDVS LKQPLSTVILPLVCAVLAIFIITIGIVIHIRENQQFDIETADFD  
 FLQSDVIVVETFWKMYHSILQVLC LRREVQSNNYLRLVSPDASSSHYGSVPXIGAVRRIIIIVTV  
 WMIGRCHHVSKSLTAEFLYWFLRLRFQHTVKEKLFDSNPASTWNWPHFRNCNYLLVL

## CLUSTAL O(1.2.4) multiple sequence alignment

|                              |                                                                     |     |
|------------------------------|---------------------------------------------------------------------|-----|
| A0A0J7L0J5_Ca-ind_PLA2       | MYMVDVEVSY-RTWGIWTFDTSARIEFITEYLNQNVTAQTNTKIAGDYISSVNETKL           | 59  |
| PhospholipaseA2-6-Pverdolaga | MTICTSNSKYLFLVLQILWIL-PFSLAFNVKRWANNSDDCNY-----DLQVENDGPV           | 51  |
|                              | * : : * : * : : * : : : * : : : * : : : * : : : * : : : * : : : *   |     |
| A0A0J7L0J5_Ca-ind_PLA2       | MIDIRKGDYDFIQKATAISTYFI-----DCKYYGQTNDFVFAYNFTSPGMTH                | 107 |
| PhospholipaseA2-6-Pverdolaga | TLDPITFYAVLECAAAEYHYVYIFQDNAVPPHRIQVDGSTGANVSFVYNANIYRPGVYI         | 111 |
|                              | : * : * : : * : : * : : * : : * : : * : : * : : * : : * : : * : : * |     |
| A0A0J7L0J5_Ca-ind_PLA2       | -----EIGALVIASYNPQTTTTLVPPTTTTAPINVTTVSPNAIMTN                      | 148 |
| PhospholipaseA2-6-Pverdolaga | LKVSFSGMWSPVLVGIASTSTFVISEYIPGSL-----NISDIKVRNQGGSLYISS             | 163 |
|                              | : : * : : * : : : * : : : * : : : * : : : * : : : * : : : * : : : * |     |
| A0A0J7L0J5_Ca-ind_PLA2       | PNGTRITVP--LTTTMLPT-----TVASADPSIKPATAAP--PIAVSTIDAA                | 191 |
| PhospholipaseA2-6-Pverdolaga | GSVTNLTINLHYPSSVYPLLETSSYWNVEKDQFITVDPFIIYNFTQPGTYRISVSAVAR         | 223 |
|                              | . * : * : : : : * : : : * : : : * : : : * : : : * : : : * : : : *   |     |
| A0A0J7L0J5_Ca-ind_PLA2       | NIYLPYICSNTSLIPDPNKTYGYFYKKIHVRAPVTNISVEGTNWIQPDMLSLNVTCKG          | 251 |
| PhospholipaseA2-6-Pverdolaga | PVYNV----LAVPTQIMKYKWGYFNTVATVKDSMTAVNLTGNTYLKHGQLNLNLDVSC          | 278 |
|                              | : * : : : : : : : * : : : * : : : * : : : * : : : * : : : * : : : * |     |
| A0A0J7L0J5_Ca-ind_PLA2       | SGPFSKCLQFHGKYNVTGNETCNNAELRSCNFSILHYFLEPSVYTIILINNEVKNQV           | 311 |
| PhospholipaseA2-6-Pverdolaga | SGPFEYCWKIFQPFEN-VTDLTCPSPIVTTKCSFPIIYFQESGNYQVAILVDNYITSIQ         | 337 |
|                              | *****                                                               |     |
| A0A0J7L0J5_Ca-ind_PLA2       | YPLTINIYKVTTPQLSVIWPVSCSLVAVVLVIFGVAYYIQSARFTVEVADFDFGQSN           | 371 |
| PhospholipaseA2-6-Pverdolaga | RNIEVHVYDVS LKQPLSTVILPLVCAVLAIFIITIGIVIHIRENQQFDIETADFDLQSD        | 397 |
|                              | : : : * : * : : * : : : * : : : * : : : * : : : * : : : * : : : *   |     |

[www.mdpi.com/journal/toxins](http://www.mdpi.com/journal/toxins)



## CLUSTAL O(1.2.4) multiple sequence alignment

```

A0A087SVA4_PLA2_(Fragment)      MLPDKFCVIFLWMSLAFAYVSSGKLRRLQDLDLADMFDTLTGLDPTDYPYGNWCGYG 60
PhospholipaseA2-7-Pverdolaga    -----MTLGAPNIRRKIKRDLADMFELTQLDPTTEYPYGNWCGYG 44
                                   ::  :  *  :  :  :  :  :  :  :  :  :  :  :  :  :  :  :  :  :  :  :  :  :  :
A0A087SVA4_PLA2_(Fragment)      GQGKPVVDHIDSCCQIHDECYGQS-EKKCSNVQVHVQYAWKINNATIIICSD-EANCEASI 118
PhospholipaseA2-7-Pverdolaga    GDGEILDRIIDRCCEIHRCYGVKSENVCNEQVHIINYQWNRENDTITCDGNTSKCEMEA 104
                                   *  *  :  :  *  *  *  *  :  :  :  :  :  :  :  :  :  :  :  :  :  :  :  :  :
A0A087SVA4_PLA2_(Fragment)      CKCDKEVEECIAQHSHSYSEHYRFIRKSR----- 147
PhospholipaseA2-7-Pverdolaga    CMCDRDVVLCHKHNGDYSHEVRYVDSKPKTSGVPQWSSMNDKTKRSDGSEIPLMGRM 164
                                   *  *  *  *  *  *  *  *  :  :  :  :  :  :  :  :  :  :  :  :  :  :  :
A0A087SVA4_PLA2_(Fragment)      ----- 147
PhospholipaseA2-7-Pverdolaga    GNMSLIFX 172

```

## PhospholipaseA2-8-Pverdolaga:

MGFLLTAALTFILLAGYSPFSAEKPLQIRRNKRSLFDLNDMIKQLTGRLGLDFIGYGNYC GFGGE  
 GKPVDDIDRCCCKMHDICYDFAQNDDCAEDPNVVYKIKYGWQQKSFGVQCSFSQSKCMKV  
 CICKDVRFAKCLKNYINEYNNSNKHEKDLQELLEEVQQMSK

## CLUSTAL O(1.2.4) multiple sequence alignment

```

A0A087TLC5_PLA2_(Fragment)      -----MVTLAWAVSSGVLFFVKGCSSVLDLGNMLRMVTGRNPLDFVNYGNIC 49
PhospholipaseA2-8-Pverdolaga    MGFLLTAALTFILLAGYSPFSAEKPLQIRRNKRSLFDLNDMIKQLTGRLGLDFIGYGNYC 60
                                   ::  :  :  :  :  :  :  :  :  :  :  :  :  :  :  :  :  :  :  :  :  :  :
A0A087TLC5_PLA2_(Fragment)      GLGSGPVVDKIDRCCKMHDICYDKASDTVCGEEKPHL--AAYTWKYAAGKIKCNKVDRLP 107
PhospholipaseA2-8-Pverdolaga    GFGGEGKPVDDIDRCCKMHDICYDFAQNDDCAEDPNVVYKIKYGWQQKSFGVQCSFSQSK 120
                                   *  *  *  *  *  *  *  *  :  :  :  :  :  :  :  :  :  :  :  :  :  :  :
A0A087TLC5_PLA2_(Fragment)      CGLASCKDAKFAICSIYKDSYDPRNKRTRPIFSIISNIAQLHPTRKSSSEGISIRIG 166
PhospholipaseA2-8-Pverdolaga    CMKVVCICKDVRFAKCLKNYINEYNNSNKHEKDLQELLEEVQQMSK----- 165
                                   *  *  *  *  *  *  *  *  :  :  :  :  :  :  :  :  :  :  :  :  :

```

## PhospholipaseA2-9-Pverdolaga:

MERKYLLEYCAVVLGSIITYPQSLFAGVKNVLDVSNVNAIVEEVSLGLRSLSAGLDFVDQFVQTAG  
 SEECFLFHCPSPGKKLVNPQKYKPVPSGCGAYGVTLVKNVSPQKEFTECCNYHDIYGTCLSKKEI  
 CDEKFDKCLNKA CAKQAKEIGEKKFGDC KMAAKVFYAGTVALGCKAFLDAQAEACICPEA  
 WSVRLCVRSTRQICVVYGEDAIAPRTA

## CLUSTAL O(1.2.4) multiple sequence alignment

```

XP_011150082.1_Group_XIIA_Sec_PLA2_(Predicted) MDLSRYRKFIIVLTFLAYAWSGYSGLLSNLDAVLAAESVFHDFENAITVARIKIDI 60
PhospholipaseA2-9-Pverdolaga    ---MERKYLLEYCAVVLGSIITYPQSLFAGVKNVLDVSNVNAIVEEVSLGLRSLSAGLDFV 56
                                   *  *  *  *  *  *  *  *  :  :  :  :  :  :  :  :  :  :  :  :  :
XP_011150082.1_Group_XIIA_Sec_PLA2_(Predicted) HEVFDAAVEENCYFQCPDGSAPKPDWNHKKPRNCCSLGIEVSQEYLPLAEMTKCCDFHD 120
PhospholipaseA2-9-Pverdolaga    DQFVQTAGSEECFLFHCPSPGKKLVNPQKYKPVPSGCGAYGVTLVKNVSPQKEFTECCNYH 116
                                   :  :  :  :  :  :  :  :  :  :  :  :  :  :  :  :  :  :  :  :  :  :
XP_011150082.1_Group_XIIA_Sec_PLA2_(Predicted) ICYDICTDKENCLEFKPKYKPCDTY-QTTGLTIVNCGAAKVLFTGTTALGCCSFL 179
PhospholipaseA2-9-Pverdolaga    ICYGTICSKKEICDEKFDCLNKA CAKQAKEIGEKKFGDC KMAAKVFYAGTVALGCKAFL 176
                                   *  *  *  *  *  *  *  *  :  :  :  :  :  :  :  :  :  :  :  :  :
XP_011150082.1_Group_XIIA_Sec_PLA2_(Predicted) DAQKEACCPDKGSTRNKKPKKAA-QAGGEL----- 210
PhospholipaseA2-9-Pverdolaga    DAQKEACCPDEAVSVRLCVRSTRQICVVYGEDAIAPRTA 215
                                   *  *  *  *  *  *  *  *  :  :  :  :  :  :  :  :  :  :  :  :

```

## PhospholipaseA2-10-Pverdolaga:

FGYIMVLKNGSLSDNDSEEVATGENLTMIKILDGNGYLKDADIRCTWSIDMERFDLEGTSLN  
 TYYPDGMYSYIAVAVFATLPSSKTVFGLFTKELVVKVPVSDITISGNPFIHHNEVLNLNVSWTGT  
 PFEYCWDIINSNETVEGNFTCMVIVTYDTSFPVTRYFQKNGTYTMAIHVSNDVKLVKRNMEIIV

FSVLPKSQLSTVIIPIVCSLLTLVIIAIGIAYYRQRRQLIVEVASFDFHDNSDSYRERTFFEQLWDS  
FRCRGCCPSLSVRSDCLPSENEPLLT

CLUSTAL O(1.2.4) multiple sequence alignment

|                                                     |                                                                |            |
|-----------------------------------------------------|----------------------------------------------------------------|------------|
| E2B1P4_Ca-ind_PLA2<br>PhospholipaseA2-10-Pverdolaga | MQTAYFYCQFIWGWCFLQVTATDYVKLSYDGPVLGANITFRADLYEQSWFPQKQYKY      | 60<br>0    |
| E2B1P4_Ca-ind_PLA2<br>PhospholipaseA2-10-Pverdolaga | VWSDSLKNTYMIITLNTVFWNTSYPRNNTSGNYKMTLQVYNKIHKLFPIWIFVTSDSI     | 120<br>0   |
| E2B1P4_Ca-ind_PLA2<br>PhospholipaseA2-10-Pverdolaga | DFEITEYLNNGNMTIKQNNKIMRDYISSINEAKLIADIIHKEDYDFIIQKAMTISTFWFID  | 180<br>0   |
| E2B1P4_Ca-ind_PLA2<br>PhospholipaseA2-10-Pverdolaga | CQYYGQTNDFTFAYNFTNPGTTHEIEALVIASDNPTTTTILPPTTTTATNVTTPPNIT     | 240<br>29  |
| E2B1P4_Ca-ind_PLA2<br>PhospholipaseA2-10-Pverdolaga | TASLNGTHVTAVTTMLPTTIASANPAIIASPI TVS---MTDATNISFP-----YVC      | 289<br>74  |
| E2B1P4_Ca-ind_PLA2<br>PhospholipaseA2-10-Pverdolaga | SNISFIPDPKKIYGYFHKIYVRVPISNISVEGTNWIQPWDMLSLNVTCKGSGPFSKCL     | 349<br>134 |
| E2B1P4_Ca-ind_PLA2<br>PhospholipaseA2-10-Pverdolaga | QFHHGKYNVTGNETCSNVEHLHSCNFSILHYFLEPSVYIILILNNEIGAHYPLTINIY     | 409<br>193 |
| E2B1P4_Ca-ind_PLA2<br>PhospholipaseA2-10-Pverdolaga | KVTTKQLSVIVVPVTCSLVAWLIVFGVAYYIQRARFTVEANFDFGQKASGLIVPLP       | 469<br>252 |
| E2B1P4_Ca-ind_PLA2<br>PhospholipaseA2-10-Pverdolaga | QNI VTHHKISTMAWLGTIANNVLRN--IVFSDVPPNVVQEV RPEQYSNRRIHSREDGIVL | 527<br>287 |
| E2B1P4_Ca-ind_PLA2<br>PhospholipaseA2-10-Pverdolaga | YGPGEIKNQDKYEIVLHRPCTETLHQAYS LFRSETLEEADARFLIYKDKVPVLVQIAREI  | 587<br>287 |
| E2B1P4_Ca-ind_PLA2<br>PhospholipaseA2-10-Pverdolaga | CNVGKIQKLCDTLVEHPAWTLAHLAAYFALHDAFMHAAVNSQLNSGDLTGISPLQVAIQ    | 647<br>287 |
| E2B1P4_Ca-ind_PLA2<br>PhospholipaseA2-10-Pverdolaga | TNNLRVTELLIAASKSLEHLHDNANTVYHYAATSTKEIILALGSGLPNSLNSNSNGHTP    | 707<br>287 |
| E2B1P4_Ca-ind_PLA2<br>PhospholipaseA2-10-Pverdolaga | IHVACQNDKPECVKALLIGADVNI PATEGQPSSPGYVGDFLHNKPNVLHAEDMKFGGTP   | 767<br>287 |
| E2B1P4_Ca-ind_PLA2<br>PhospholipaseA2-10-Pverdolaga | LHWSRSEVITALIDTNCIDALNFEGRTALHVMVMRKRLPCVALLSHMASVNIVDNDG      | 827<br>287 |
| E2B1P4_Ca-ind_PLA2<br>PhospholipaseA2-10-Pverdolaga | NTPLHLAVEAETLAIVQTLIGFGADIDARNWKSETPRHKANIDTTEGNKIIYLLHAVGAE   | 887<br>287 |

|                                                     |                                                                 |             |
|-----------------------------------------------------|-----------------------------------------------------------------|-------------|
| E2B1P4_Ca-ind_PLA2<br>PhospholipaseA2-10-Pverdolaga | KCPAEMTGCHLGCKYGENYGTIAPSEPPRYVPRITILDQMLHVSSMEKMAEQGRDKRIKGG   | 1007<br>287 |
| E2B1P4_Ca-ind_PLA2<br>PhospholipaseA2-10-Pverdolaga | RLLCLDGGGIRGLVLIQTLLLEIESVLKRPVWHCFDWIAGTSTGGILALGLAAGKSLRECQ   | 1007<br>287 |
| E2B1P4_Ca-ind_PLA2<br>PhospholipaseA2-10-Pverdolaga | ALYFRIKEDAFVGSRPYNSEGLEKVLKECLGTYTMADIDKPKIMITGVLADRPVDLHL      | 1067<br>287 |
| E2B1P4_Ca-ind_PLA2<br>PhospholipaseA2-10-Pverdolaga | FRNYESPALLKVPGNMFKTTLSSREQLLWKAARATGAAPSYFRAFGRFLDGGLIANNP      | 1127<br>287 |
| E2B1P4_Ca-ind_PLA2<br>PhospholipaseA2-10-Pverdolaga | TLDAMTEIHEYNLALKATGREKEAIPLSLVVSI GTGLMPTTVTLNEIDVFRPESLWDTAK   | 1187<br>287 |
| E2B1P4_Ca-ind_PLA2<br>PhospholipaseA2-10-Pverdolaga | LAFGISALGTL LVDQATASDGRVVD RARTWCSMIGIPYYRFNPQLTEDVAMDEKSD EILA | 1247<br>287 |
| E2B1P4_Ca-ind_PLA2<br>PhospholipaseA2-10-Pverdolaga | HMIWTAKAFMHANRDQVKELAAIIDRDTNLND                                | 1280<br>287 |

### PhospholipaseA2-11-Pverdolaga:

XGDLVDTDPYVVLKVPGPSNGKKRTKYFNNTINPTWKETFTFVLDPKKNYELEVLMDANYT  
IDQRLGX

CLUSTAL O(1.2.4) multiple sequence alignment

|                                      |                                                             |     |
|--------------------------------------|-------------------------------------------------------------|-----|
| A0A087UL97_Cytosolic_PLA2_(Fragment) | MECETLADQLLLSEQPISEVPPLSLQVFQVTPDSCNINLVTVVEAHKIKGWVGDLVDK  | 60  |
| PhospholipaseA2-11-Pverdolaga        | -----XGDLVDT                                                | 7   |
|                                      | *****                                                       |     |
| A0A087UL97_Cytosolic_PLA2_(Fragment) | PDPYVILRIPGSPNGMKRTKHFNNTSSPTWNEEFFVLDPQKEYELEITLMDANYTIDEK | 120 |
| PhospholipaseA2-11-Pverdolaga        | PDPYVWLKVPGSPNGKKRTKYFNNNTINPTWKETFVLDPKEKNYELEVLMDANYTTDQR | 67  |
|                                      | *****::***** ***** ***** *****::*****::*****::*****::       |     |
| A0A087UL97_Cytosolic_PLA2_(Fragment) | MG-                                                         | 122 |
| PhospholipaseA2-11-Pverdolaga        | LGX                                                         | 70  |
|                                      | .*                                                          |     |

### PhospholipaseA<sub>2</sub>-12-Pverdolaga:

MSIIRDILGGFRKVSQVDDPFRVLEVNVEDYLTVDVVCREDCLVLYKANDRGVMKLEIVVQL  
HINHSSNKNNKVYSLHRSEDETNCQILFSQMCQKIPILIDYVPEVGLSKMALQNVSQVIRENLA  
WNAAHIAAHFGYTDCKFKYKTMASEISEPCCEGLTQTPLVHAIKASQFPVVALVALDVVMDIV  
DCNGDSIFHYAATTTKEIIQALS VKPCVPVINMLNHDGHTPLHLACMADKPECVKELLRAGA  
DVNMA SIVDVDEVDRAQAAEMPSKLLSDVMHTHAQRLYMDDMKTGGTPLHWSKTSeltaI  
LIEYGCHIDAKNFEGNTALHVMVLRNRISC AVTLLSHGANVDIQGADGNTPLHLAVKSGDIY  
LVYAFVAFGANVNAINNKGETPRHILATEKRPGFEEMLYALHIVGAERCQRRTPWCKDGCCEP  
GOHFNGIPSENPPVLNKTTLDDLLGAT



## CLUSTAL O(1.2.4) multiple sequence alignment

|                                                                       |                                                                                                                            |            |
|-----------------------------------------------------------------------|----------------------------------------------------------------------------------------------------------------------------|------------|
| XP_002399324.1_Ca-ind_PLA2_(partial)<br>PhospholipaseA2-12-Pverdolaga | -----<br>MSIIRDILGGFRKVSQVDDPFRVLEVNVEDYLYTDVVCREDCLVLYKANDRGVMKLEIV                                                       | 0<br>60    |
| XP_002399324.1_Ca-ind_PLA2_(partial)<br>PhospholipaseA2-12-Pverdolaga | ---VSIPPADGAVSCSLLRTKDQVAAEVSVFQLRDKLPLLLCVPDLL-SKDLVQEVVL<br>VQLIHNSNKNKVSLSHSEDETNCILFSQMCQKIPILIDYVPEVGLSKMALQNVSQ      | 55<br>120  |
| XP_002399324.1_Ca-ind_PLA2_(partial)<br>PhospholipaseA2-12-Pverdolaga | LVRNNPSWTLAHLAHLGLVDCFKNQKVAAQICQPAQDTLATPLHIAVRAQKLSNVQVLM<br>VIRENLAWNAAHIAAHFGYTDCFKYKTMASEISEPCEGTLQTPHVAIKASQFSPVVALV | 115<br>180 |
| XP_002399324.1_Ca-ind_PLA2_(partial)<br>PhospholipaseA2-12-Pverdolaga | GMDAPLNLTDHNGDTIYHAAVTTKELIKALSVPAPTAVINQVNNNGYTPQLACLTDK<br>ALDVMDIVDCNGDSIFHYAATTTKEIIQALSVPKCV-PVINMLNHDGHTPLHLACMADK   | 175<br>239 |
| XP_002399324.1_Ca-ind_PLA2_(partial)<br>PhospholipaseA2-12-Pverdolaga | PECVRELLKEGADVNSASSRGSNCT-----FFFFSLGRDHVEQNGHNFQIEDMKHGGTP<br>PECVKELLRAGADVNMASIVDVDEVDRQAEMPSKLLSDVMHTHAQRLYMDDMKTGTP   | 230<br>299 |
| XP_002399324.1_Ca-ind_PLA2_(partial)<br>PhospholipaseA2-12-Pverdolaga | LHWAKTTQCLEMIELGCDLDAKNFQGNLTHIMVARGRLACVISLLSHGASVNAVCGDG<br>LHWKSTSELTAILIEYGCHIDAKNFEGNLTHVMVLRNISCALVLLSHGANVDIQGADG   | 290<br>359 |
| XP_002399324.1_Ca-ind_PLA2_(partial)<br>PhospholipaseA2-12-Pverdolaga | DTPLHA AVR-GDVSLIHALIVFGADVNPQKGETARHLAATSKLSKRDSVLYTLHAVGA<br>NTPLHLAVKSGDIYLVYAFVAFGANVNAINNKGTPPHILATEKRPGFEEMLYALHIVGA | 349<br>419 |
| XP_002399324.1_Ca-ind_PLA2_(partial)<br>PhospholipaseA2-12-Pverdolaga | RRCDRD-QGCSEGCSPGSGFVGVAPEKPNFFKASRREWAGLGGGASAIPLPLKLNRRSLA<br>ERCQRRTPWCKDGCPEGQHFNGIPSENPPVLNKTLLDOLLGAT-----           | 408<br>463 |
| XP_002399324.1_Ca-ind_PLA2_(partial)<br>PhospholipaseA2-12-Pverdolaga | VGSKWRLTDGRCAVGKTPRQCLQLYFSLKDKMGVGRRRSRELTPMGSKWRLNDGRCAVGK<br>-----                                                      | 468<br>463 |
| XP_002399324.1_Ca-ind_PLA2_(partial)<br>PhospholipaseA2-12-Pverdolaga | TPRQCLQLYFSLKDKVFIGNRPHDADSLEKFLQREMGETTLMTDIKHPKLMITGVLAADRH<br>-----                                                     | 528<br>463 |
| XP_002399324.1_Ca-ind_PLA2_(partial)<br>PhospholipaseA2-12-Pverdolaga | PAALHLFRNYDSPKKILGVTEDESDFPSCPTPPHEQLVWRAARASGAAPTYFRPFGRFLDG<br>-----                                                     | 588<br>463 |
| XP_002399324.1_Ca-ind_PLA2_(partial)<br>PhospholipaseA2-12-Pverdolaga | GLISNNPTLDAMTEICEYNEALKATVRLWLPNIFENELFCIFDITYHINIHRDENVKVR<br>-----                                                       | 648<br>463 |
| XP_002399324.1_Ca-ind_PLA2_(partial)<br>PhospholipaseA2-12-Pverdolaga | TQQATQANGRLVDRAQAWCRTIGVPYFRLNAPISEDVCLNETDNRLLRVVLWETLVYMRG<br>-----                                                      | 708<br>463 |
| XP_002399324.1_Ca-ind_PLA2_(partial)<br>PhospholipaseA2-12-Pverdolaga | RAELDELAQLVRP<br>-----                                                                                                     | 722<br>463 |

**PhospholipaseA2-13-Pverdolaga:**

XRLHELDEPADA EPLIQNSGLPAKYPSFKMMLELINNCSQLELPVHKVASSIATNQSEPNTIS  
KWSPWALWNGIVPGTKWCGVGDIASFEELGSQAVVDSCCRADHDHCPVKLKAFRVGYGMI  
NLSFYTKSHCDCDRLFHSCCLKQTKNKLAVGNFYFNFIRVQCLKERKVYVCVENRTDVGDL  
NECIRWSVDPDSRKX

| Protein                                                                   | Sequence                                                                                                                                                                                        | Score      |
|---------------------------------------------------------------------------|-------------------------------------------------------------------------------------------------------------------------------------------------------------------------------------------------|------------|
| XP_012259279.1_Secretory_PLA2_isoform_X2<br>PhospholipaseA2-13-Pverdolaga | MGLAVIFLLVITCSVQTLQOPTIFRNTYKGLRGVIPKVRPLDEEIRAAVFHDQTVAVIDL<br>-----                                                                                                                           | 60<br>0    |
| XP_012259279.1_Secretory_PLA2_isoform_X2<br>PhospholipaseA2-13-Pverdolaga | SNSNQLKNCDDIEVYEPLAEAMVKNLSTVEQPVQVFIEMTTLMRQCEMLDMKEDAIS<br>-----XRLHELDEPADAEPLIQNSG--LPAPKYPSEFKMMLELINNCSQLELPVHKVAS<br>*: *: *: *: *: *: *: *: *: *: *: *: *: *: *: *: *: *: *: *: *       | 120<br>50  |
| XP_012259279.1_Secretory_PLA2_isoform_X2<br>PhospholipaseA2-13-Pverdolaga | TLPTI-DTKNRGSKPGVNPPLSLFLFGILPGTKWCGTGDIAADNYHDLGQEARIDRCRSHDLC<br>STATNQSEPNNTISKSPWALWNGIVPGTKWCGVGDIASFTFEELGSQAVVDSCCRAHDC<br>*: *: *: *: *: *: *: *: *: *: *: *: *: *: *: *: *: *: *: *: * | 179<br>110 |
| XP_012259279.1_Secretory_PLA2_isoform_X2<br>PhospholipaseA2-13-Pverdolaga | PKVKVRAQKSRYNLTNNISYTKSHCVCEMLYHCLKKAYHPADVMGRIYFNFIRVQPCVED<br>PVKLKAFRVGYGMINLSFYTKSHCCDRLFHSLCLKQTKNKLNAVGNFYFNFIRVQCLKE<br>*: *: *: *: *: *: *: *: *: *: *: *: *: *: *: *: *: *: *: *: *    | 239<br>170 |
| XP_012259279.1_Secretory_PLA2_isoform_X2<br>PhospholipaseA2-13-Pverdolaga | VTNGTQGSVKRFID--VKMNY-----<br>RKVVYVCVENRTDVGDLNEICRWSVDPDSRK                                                                                                                                   | 258<br>200 |

X C R A H D L C D D T L A P G E T K H N L T N R S T F T K L N C Q C D Q E F Y E C L Q K V D S L V S N S I G N L Y F N V L R  
R G C Y E Y D H P L T K C K S Y R T

|                                                             |                                                                                                                                                                                                |           |
|-------------------------------------------------------------|------------------------------------------------------------------------------------------------------------------------------------------------------------------------------------------------|-----------|
| A0A087UYP4_PLA2_(Fragment)<br>PhospholipaseA2-14-Pverdolaga | MEHIVRCLLTFCLVWVISCXSAFREKMFFLQRPSEENKTLVVWTWSEGRQEATGCEIF<br>-----                                                                                                                            | 60<br>0   |
| A0A087UYP4_PLA2_(Fragment)<br>PhospholipaseA2-14-Pverdolaga | TNEELIQNILKLSPDQS VKKPSPEEMKS LLEDCTEISIRRKRS AEHETRRTGDDRRIYGN<br>-----                                                                                                                       | 120<br>0  |
| A0A087UYP4_PLA2_(Fragment)<br>PhospholipaseA2-14-Pverdolaga | EPHTRNDRSRSHSYESHTVNSRGKDFNNGNNRRVVI EESWSNGDRSSINENGANYDNTE DY<br>-----                                                                                                                       | 180<br>0  |
| A0A087UYP4_PLA2_(Fragment)<br>PhospholipaseA2-14-Pverdolaga | ESTTMIPP NEMEGPKKESSTTEGYDGLP VIFPGTKWCGAGDI AKSYDDLGLHQDTDRCCR<br>-----XCR<br>**                                                                                                              | 240<br>3  |
| A0A087UYP4_PLA2_(Fragment)<br>PhospholipaseA2-14-Pverdolaga | AHDLCNDT LAPGETRN NL TNNSPFTKLSC KCDQDFYDCLDRINSVTANTIGNMYFNLLKR<br>AHDLCDDT LAPGETKHNL TRNSTFTKLNC QCDQFEYEC LQKVDSLVS NSIGNLYFNVLR<br>*****.*****.*.*****.*.*****.*.*****.*.*****.*.*****.*. | 300<br>63 |
| A0A087UYP4_PLA2_(Fragment)<br>PhospholipaseA2-14-Pverdolaga | ECYKKDYPRSSCKRYRSLLIKITCKEYEKDANAEVYQIWP AKRYKNLPVP GPF SVTL PF<br>GCYEYDHPL-TKCKSYRT<br>*. *. * .*** **.                                                                                      | 360<br>80 |

MPRSQNAFSRNSSIYSSLYTRSVNISKEKR KLLLHKTYCTSKRSSDLNVSKPSSDKIPGNSIFSTIW  
KSVVVASSMLRPGLSVTPPKSIPIREFISKVGNVVSTEKYSKLLQPYLKLRSVNSEENVNRQTTEKS  
RTCSKPGVVSQAGNVISGEKESVFEQAAAEWITSANLQEKKQENLSNQKEKKSENLPKVLISKAS  
LASRSRFLVRSLS CASSQSSQMLRLEEVC KHL LQHPQEKGT LVKEGLIRVALRLRRKSSNTDIQT  
QACV AL TLLGYHEPPGGQGIRILSIDGGGTRGLMAIEILRQLQARTGKT VHEMFDYIC GVVSSGA  
ILTFL L GGLRLSPDEC ES LYRELSLEVFKASGIWGAGRLMWYHAYYDTSMWVDVL RKTFTGDK  
MLIDSVKEKSSPKLAAISAVMNL PALRA FVFRNYDYP IRVQSQYIGSANYRMWEAIRASGAAP  
GYFEFH L NHLLHQDGGIMIN NPTALAIHEARLLWPSDYIQ CVFSLGSGRFTPATNTAFTSTTL  
KTKVQKVIDSATDTEAVHISMNDLLSPGTYFRFN PYL TEF L HLDENRPDKLHQLKMDAQMYL  
RRNEHKLEOSIKVLTRPRSTLKKINDWIOLOKTL LL

| Protein Name                            | Sequence                                                       | Position |
|-----------------------------------------|----------------------------------------------------------------|----------|
| A0A087TW26_Ca-ind_PLA2-gamma_(Fragment) | -MKAHGVLSQAIWRSFPIFRAVSSSKKKRKFVFSHHYGTSSKPASSNLSSKNNFLNLI     | 59       |
| PhospholipaseA2-15-Pverdolaga           | MPRSQNAFNRSSNIYSSLYTRSVNISKEKRKLHLHKTYCTSKRSSD--LNVSKPSS--D    | 55       |
| A0A087TW26_Ca-ind_PLA2-gamma_(Fragment) | RNTTDLNRPMIWKSVTVASSLFNNVTLRFSKNKIVEEPKSVSV-----               | 102      |
| PhospholipaseA2-15-Pverdolaga           | KIPGNSIFSTIWKSVVASSMLRPLGS-----VTPPKSIPIREFTSKVGNVSTEKYS       | 108      |
| A0A087TW26_Ca-ind_PLA2-gamma_(Fragment) | -----STNIQKLEKSTSTSGG-KMTVIPGGQSDKREASLEQGAENLTGDE             | 147      |
| PhospholipaseA2-15-Pverdolaga           | LLQLQPYLKLRSVNSEENVRTTEKSRTECKPGVSGAGNVISGEKESVFEEQAAAEWITSAN  | 168      |
| A0A087TW26_Ca-ind_PLA2-gamma_(Fragment) | LQTKKKEFFGG-KEEKYVEKSKKVVISKSSLQQRSLFVSSLLDATTSSGSQLRLLEEICKH  | 206      |
| PhospholipaseA2-15-Pverdolaga           | LQEKKQENLSNQKEKSENLPKVLISKASLASRSLFVRSLSLSCASSCSSQMLRLLEEVCCKH | 228      |
| A0A087TW26_Ca-ind_PLA2-gamma_(Fragment) | LLLYPDQKSTMCAGLVRTLHMKCNSSDNVRAQARCTLSLVGYNESPKGHGIRILSID      | 266      |
| PhospholipaseA2-15-Pverdolaga           | LLQHPQEKGLTVKEGLIRVALRLRRKSSNTDITQACVALTLGYHEPPGGQGIRILSID     | 288      |
| A0A087TW26_Ca-ind_PLA2-gamma_(Fragment) | GGGTRGIIAEVLRLQLEARTNKRIEYLFDFMCGVSSGAVLSLLLGGRLSLDECEALYRR    | 326      |
| PhospholipaseA2-15-Pverdolaga           | GGGTRGLMAIEILRLQLARTGKTVHEMFYICGVSSGAILTFLGLGLSPDECEALYRE      | 348      |
| A0A087TW26_Ca-ind_PLA2-gamma_(Fragment) | LSDEVFSQSSFSGWTSRLMWSHAYYDTTMVVKVKKTFGEKLLIDTCKEEFAPKLAASVAL   | 386      |
| PhospholipaseA2-15-Pverdolaga           | LSLEVFKASGIWAGRLMWHAYYDTSMVVDVLRKTFGDKMLIDSVKESSPKLAASVAL      | 408      |
| A0A087TW26_Ca-ind_PLA2-gamma_(Fragment) | MNLPHLQAFVFRNYDFPPHVQSYHHGSCRYRMWEAIRASGAAPGYFEYCLDDYLHQDGG    | 446      |
| PhospholipaseA2-15-Pverdolaga           | MNLPALRAFFVFRNYDYPRVQSQYIGSANYRMWEAIRASGAAPGYFEFHLNHLHQDGG     | 468      |
| A0A087TW26_Ca-ind_PLA2-gamma_(Fragment) | IMVNNPTALAIHEAQLLWPSDGIQCVMSLGSGRYPVPPQPNFTSTSLTKVKLVKVIDSATD  | 506      |
| PhospholipaseA2-15-Pverdolaga           | IMINNPALAIHEARLLWPSDYIQCVFSLGSGRFTPATNTAFTSTTLTKVKQKVIDSATD    | 528      |
| A0A087TW26_Ca-ind_PLA2-gamma_(Fragment) | TEAVHISMNDLLSPGTYFRFNPLYTEFLHLDENRPDKLHQLKMDAQMYLRNHEHLEQSI    | 506      |
| PhospholipaseA2-15-Pverdolaga           | -----                                                          | 588      |
| A0A087TW26_Ca-ind_PLA2-gamma_(Fragment) | -----                                                          | 506      |
| PhospholipaseA2-15-Pverdolaga           | KVLTRPRSTLKKINDWIKLQKLTLL                                      | 613      |

MAEEEEYHLMCSILAHGSDIRSVTTSYVPLGGIVTGSRDKTIKLWRPTGTTFTTEEHCMRGASHFIS  
SLCALPPSDQYPDGLILAGSNDCAIYGFSLDSSEPILKLLGHSENVCALVAGNLGTIVSGSWDKT  
ARVWHGQRCVATLSGHTQAVWAVALLPDHALVLTGSADKAVFLWNNGKCERKFIGHEDC  
VRGLTVISDLEFLSCSNDTTVRRWQTSGECLGIYTGHTDYVYDICLSSCREYFISCSQDQTVKVV  
KENVCVQTIKLPKSLWAVTYLYNGDIAVGGSDGSRVFTKDKSRRASPAEEARFNEEIVSMN  
SKNMKQNIQDLELDDVPGPDALLQDGTSDGQTQLCKVGNEVSVFQWSVKEHKWLKLGKVL  
DALDNRPAKGKTVYEGKEYDYVFTIDVAEGKLLKLPYNDTEDPWLV AHKFIEKHDLNPMFLD  
QIANFIINNSKSAGVQAESMSEFSDPFTGASRYIPSNVGKPSLASNHGDNSSIQELPKSNPTGN  
GDIEKASTGAHFPLITYVTFTDANTNGIRAKLCFTEKIEKSQQLSIEKIEHMLLLLDYPQAITD  
DQMLSLEKALSWPAEFVFPALDVLRLAVRAEPVNSRVSKDGGVGLINHLLRYVSTGNPVSNQ  
MLVLRTLSNFFVCPSGEQLLVSQAKKVLSLTRSCCASKNKHVQIALATLYANYSVAFQKSTSSE  
DTYCKDMYLNDAVEALKQFNEPEALFRLIVCIGTAVQDKYCLQVAKALKIGEIVQSVLERCEV  
SKIODFGATLIDIVSN

## CLUSTAL O(1.2.4) multiple sequence alignment

|                                                          |                                                                                                                                         |            |
|----------------------------------------------------------|-----------------------------------------------------------------------------------------------------------------------------------------|------------|
| EDL30937.1_PLA2_isoform<br>PhospholipaseA2-16-Pverdolaga | MASGASRYRLSCSLPGHELDVRGLVCCLYPPGAFVSVRDRTTTLWAPDSPNRGFTEMHC<br>--MAEEHYHLMCSILAHGSDIRSVTTSYVPLGGIVTGSVDKTIKLWRPTG--TTFTEEH<br>* * * * * | 60<br>56   |
| EDL30937.1_PLA2_isoform<br>PhospholipaseA2-16-Pverdolaga | MSGHSNFVSCVCIIIPSSDIYPHGLIATGGNDHNICIFSLDSPMPLYILKGHKDVTCSLSS<br>MRGASHFISLALPPSDQYDGLILAGSNDCAIYGFSLDSSEPIKLLGHSENVCAVLA<br>* * * * *  | 120<br>116 |
| EDL30937.1_PLA2_isoform<br>PhospholipaseA2-16-Pverdolaga | GKFGTLLSGSWDTTAKVWLNCKMMLTQGHAAVWAVKILPEQLMLTGSADKTIKLWKA<br>GNLGTIVSGSWDKTARVWHGQVCVATLSGHTQAVWAVALLPDHALVLTGSADKAVFLWNN<br>* * * * *  | 180<br>176 |
| EDL30937.1_PLA2_isoform<br>PhospholipaseA2-16-Pverdolaga | GRCERTFLGHEDCVRLAILSETEFLSCANDASIRRWQITGECLEVFYGHNTIYISISVF<br>GKCEKFIHGHEDCVRLTIVISDLFLSCSNDTTRVWQTSGECLGIYTGHTDYVDICLS<br>* * * * *   | 240<br>236 |
| EDL30937.1_PLA2_isoform<br>PhospholipaseA2-16-Pverdolaga | PNSKDFVTTAEEDSLRIWKHGCAQTIPLPAQSIWCCCVLENGDIWVGASDGIIRVFTES<br>SCREYFISCSDDQTVKRWKENVCQTIKPAKSLWAVTYLYNGDIAGGSDGVSFKDK<br>* * * * *     | 300<br>296 |
| EDL30937.1_PLA2_isoform<br>PhospholipaseA2-16-Pverdolaga | EEERTASAEFIKAFERELSQATIDSKTGLDINAEQLPGREHLEPGTREGQTRLIRDGE<br>KSRASPAEEARFNEEIVSMNSKNMKQNIQDLEDDVPDALLQDQSDGQTLCKVGN<br>* * * * *       | 360<br>356 |
| EDL30937.1_PLA2_isoform<br>PhospholipaseA2-16-Pverdolaga | RVEAYQWSVSDGRWIKIGDVVGSSGANQQTSGKVLVEGKEFDYVFSIDVNEGGPSYKLPY<br>EVSVFQWSVKHKLKGLKVDLAL-DNRPAKGKTVYEGKEYDYVFTIDVAEG-KLLKLPY<br>* * * * * | 420<br>414 |
| EDL30937.1_PLA2_isoform<br>PhospholipaseA2-16-Pverdolaga | NVSDPWLVAYNLFQKNDLNPMLDQVAKFIIDNTKGQTLG-LGNTSFDPFTGAGRYMP<br>NDTEPWLVAKHFKIEKHDLPMLDQIANFIINNSKAGVQAESMSFSDPFTGASRYIP<br>* * * * *      | 479<br>474 |
| EDL30937.1_PLA2_isoform<br>PhospholipaseA2-16-Pverdolaga | GSAGMDTTMTGVPFT-----GNSAYRSAASKTVNIYFPKKEALTFDQANPTQILG<br>SNVGKPSLASNHGDNSSIQELPKSNPTGNGDIEKASTGAHFPLLTVTFTDANTNGIRA<br>* * * * *      | 530<br>534 |
| EDL30937.1_PLA2_isoform<br>PhospholipaseA2-16-Pverdolaga | KLKELNGTAPEKKLTEDDLVLEKILSLICNNSSEKPTAQQQLIWLKAINWPEDIVFPA<br>KLCEFTKEIKSQQLSIEKI---EHMLL--LLDYPQAITDDQMLSLKALSWPAEFVFP<br>* * * * *    | 590<br>589 |
| EDL30937.1_PLA2_isoform<br>PhospholipaseA2-16-Pverdolaga | LDILRLSIKHPNVNENFCNEKGDQFSSHLINLLNPKGKPAQLLALRTFCNCFVSAQK<br>LDVLRVAVRAEPVNSRVSKDGGVGLINHLVYVSTGNPVSQMLVRLTLNFFVCPSGEQ<br>* * * * *     | 650<br>649 |
| EDL30937.1_PLA2_isoform<br>PhospholipaseA2-16-Pverdolaga | LMMSQRESLMSHAIELKSGSNKNIHIALTLTNYSVCFKHNDHIEGKAQ---CLSVIST<br>LLVSQAKKVLSTLRSCCAKKNHVQIALATLYANYSVAFQKSTSSDITYCKMYLNDAVE<br>* * * * *   | 707<br>709 |
| EDL30937.1_PLA2_isoform<br>PhospholipaseA2-16-Pverdolaga | ILEVVQDLEATFRLVALLGLISDDSNALQAKSLGVDSQIKKYVSVSEPAKVSECCRLV<br>ALKQFNEPEALFRLVIGTAVQDK-YCLQVAKALKIGEIVQSVLERCEVSKIQDFGATL<br>* * * * *   | 767<br>768 |
| EDL30937.1_PLA2_isoform<br>PhospholipaseA2-16-Pverdolaga | LHLL--<br>DIVSN<br>* * *                                                                                                                | 771<br>774 |

**Pairwise alignments and amino acid sequences of phospholipases D translated from *Pamphobeteus verdolaga*.** Residues highlighted in grey indicate the signal peptide, while magenta blue highlighted residues, indicates the propeptide according to Spider|ProHMM from the arachnoserver. Residues highlighted in yellow shows cysteines potentially forming disulfide bridges. Residues highlighted in red shows amino acids implicated in the active site.

**PhospholipaseD-1-Pverdolaga:**

MKILKFLGCLIWYQVCVADEVDWRRPVWNIAMVNANYQIDYYLDMGANSIEFDVAFDNS  
 GNARFTFHGVPCDCFRSCVRHEEIEENYLEYMRHLTTPGDPKFQEKLVLLFMDLKVKGSSRAR  
 TNAGFSIARKLVRHYWQNGTSAARAHVLMSPVSDHMEVVRGFRDGLRVEGLSGYINKVGV  
 DFSGNEDLNSIRRALMSEISDRIWQGDGITNCLPRGTGRLREAIQRRDQPLTHIEKVYWWTV  
 DKMSTMATRLRLSVDAMITNYPRLVSVLDEDEFSGRFRMATIDDPWSKHELRTSALYALDE  
 GPTARGGNITTYFDKEDDELLIIASTITQTMAGINFTRGLEESIPX

CLUSTAL O(1.2.4) multiple sequence alignment

|                             |                                                               |     |
|-----------------------------|---------------------------------------------------------------|-----|
| Q1W694_LiSicTox-betaID1     | MQLFIILCLAGSAVQLEGTLDGVERADNRRPIWNIAMVNDKGLIDEYLDDGANSVESD    | 60  |
| PhospholipaseD-1-Pverdolaga | ---MKILKFLGCLIWY---QVCVADEVDWRRPVWNIAMVNANYQIDYYLDMGANSIEFD   | 54  |
|                             | * * * * *                                                     |     |
| Q1W694_LiSicTox-betaID1     | VSFDSNGKPEKMLHGSPCDCGRSCRQMSFADYLDYMRQLTTPGDPKFRENILVMDLK     | 120 |
| PhospholipaseD-1-Pverdolaga | VAFDNSGNARFTFHGVPCDCFRSCVRHEEIEENYLEYMRHLTTPGDPKFQEKLVLLFMDLK | 114 |
|                             | * * * * *                                                     |     |
| Q1W694_LiSicTox-betaID1     | LKLLSSEQAYSAGQEVASQMLDKYWKRGESGARAYIVLSIPTITRVTFVNGFYDKLHSEG  | 180 |
| PhospholipaseD-1-Pverdolaga | VKGLSSRARTNAGFSIARKLVRHYWQNGTSAARAHVLMSPVSDHMEVVRGFRDGLRVEG   | 174 |
|                             | * * * * *                                                     |     |
| Q1W694_LiSicTox-betaID1     | FDQYREKVGVDVDFSGNEDLDTGKILKSRDILDHIWQSDGITNCLFRIMKRLKAAIRKRDS | 240 |
| PhospholipaseD-1-Pverdolaga | LSGYINKVGVDFSGNEDLNSIRRALMSEISDRIWQGDGITNCLPRGTGRLREAIQRRDQ   | 234 |
|                             | * * * * *                                                     |     |
| Q1W694_LiSicTox-betaID1     | NGY--MVKVYTWSVDKYTTMRKALRAGADGMITNFPKRLVSVLNREFSGKFRLATYNDN   | 298 |
| PhospholipaseD-1-Pverdolaga | PGLTHIEKVYWWTVDKMSTMATRLRLSVDAMITNYPRLVSVLDEDEFSGRFRMATIDDP   | 294 |
|                             | * * * * *                                                     |     |
| Q1W694_LiSicTox-betaID1     | PWERYTG-----                                                  | 305 |
| PhospholipaseD-1-Pverdolaga | PWSKHELRTSALYALDEGPTARGGNITTYFDKEDDELLIIASTITQTMAGINFTRGLEES  | 354 |
|                             | * * * * *                                                     |     |
| Q1W694_LiSicTox-betaID1     | ---                                                           | 305 |
| PhospholipaseD-1-Pverdolaga | IPX                                                           | 357 |

**PhospholipaseD-2-Pverdolaga:**

MANDISDAIYLLDQGANALEFDISFFNNGTVNRVYHGVPCDCFRVCTHEASLPDYLLSTIRKITD  
 PQTGKYSQQMTFQFFDLKLQVTPWGKYVAGLEIANHVIDYLWGNDTKRQLVRVLFINDES  
 DKDVVLGVRNAFLQRGMKKFLDQVGFDDGGTGTMKSIKDMWDSLGRGNLWQGDGIFNCLS  
 EVYKDDRLREALHIRDSPNGFIDKVYHWTIDSRGRMRMSRLRGVDGMITNLPKDLIDVLNEDP  
 YSNIFRLATAKDDPFSSRFHPSKSFK







## CLUSTAL O(1.2.4) multiple sequence alignment

|                                                             |                                                                                                                                                                                                |            |
|-------------------------------------------------------------|------------------------------------------------------------------------------------------------------------------------------------------------------------------------------------------------|------------|
| XP_003744259.1_Phospholipase<br>PhospholipaseD-4-Pverdolaga | MDLRRENSDGSDEVEEFEELEDEDEENLRNSPLDTCGIATHLSTHFGSIPFARIYD                                                                                                                                       | 60<br>0    |
| XP_003744259.1_Phospholipase<br>PhospholipaseD-4-Pverdolaga | SSQSVTDSSDGFVPGVPMCFKLLGFERDPRPSHMHVHPNLYVIEVTHGDFVWVLKKRYKH                                                                                                                                   | 120<br>0   |
| XP_003744259.1_Phospholipase<br>PhospholipaseD-4-Pverdolaga | FLELHTILKLFASLALPLPNESHQMRKSFDDRAKRKEVPQFPKRPESSAQVQAR                                                                                                                                         | 180<br>0   |
| XP_003744259.1_Phospholipase<br>PhospholipaseD-4-Pverdolaga | GEQLVSYLNKVVKVANYRNHPKMTFLEVSPYSFLNSTGPKGKEGAVSKRAGGHNPNSCF                                                                                                                                    | 240<br>0   |
| XP_003744259.1_Phospholipase<br>PhospholipaseD-4-Pverdolaga | IYMKSVWYKICKRWRRLIAKDTYILYHPKTGAVKSVILMDGRFRVHEDGPTGSRSG                                                                                                                                       | 300<br>0   |
| XP_003744259.1_Phospholipase<br>PhospholipaseD-4-Pverdolaga | VIISNLSRELLIDVWTKRQRMWVKHIEELVKTRAKDFVAENRHGSYAPVRSRTLARWYV                                                                                                                                    | 360<br>0   |
| XP_003744259.1_Phospholipase<br>PhospholipaseD-4-Pverdolaga | DGAMYMRAVANAIEANREEIFITDWLSPFLKRSNKNEDWRLDLLRRKASSGVRI                                                                                                                                         | 420<br>0   |
| XP_003744259.1_Phospholipase<br>PhospholipaseD-4-Pverdolaga | FIMLYKEVSSALAINSLYSKQKISTHPNIKVFRHPDHVNAAVYLWAHHEKLVIVDQKYAF<br>-----XALPISKLDIK-----RHTSSIV-----<br>* * . * * * * * * *                                                                       | 480<br>18  |
| XP_003744259.1_Phospholipase<br>PhospholipaseD-4-Pverdolaga | LGGIDLCYGRWDDAGHRLTDLVPDENKRQGVCDSDVDEVDGYMVKPSCCVSETRFLNVA<br>-----PPPLFPVHKRSRS-----DSNV-----MTVPK-----KNQEFY-QS<br>* * . * * * * * * *                                                      | 540<br>48  |
| XP_003744259.1_Phospholipase<br>PhospholipaseD-4-Pverdolaga | GPPHNFERCLV---VPEYDQAEKIVN-SKSPSDRVSRRLMLQRVKAKLKALRAFKHLH<br>RPHDDYHIKTLKNIPSKPQPVHKLQAKVKHDENRAKQRW--RVAVKKIQAISAFQNL<br>* . . . . : : * : * : * : * : * : * : * : * : * : * : * : *         | 596<br>106 |
| XP_003744259.1_Phospholipase<br>PhospholipaseD-4-Pverdolaga | YLEGSTAEIMYEDPHSGYLSQFECL-----E-EKLEPFVTDGTYWIGKD<br>-----SQVLLQVVDGAH--QDVCLSSLPADVHRTIQEIALVHLGLERTYRLWHGKD<br>: : : * : : * * * * * : : : * : * : *                                         | 642<br>158 |
| XP_003744259.1_Phospholipase<br>PhospholipaseD-4-Pverdolaga | YSNFIYKDVNTLEKPFDDHIDRTKIPRMPWHDIGAVVLGRAARDLARHFIQRWNSIKIQK<br>YSNFIKDLNKLNEPYTDSVNRYPETPRMPWHDVSCFLQGAARDVARHFIQRWNFTKLRT<br>***** : : : * : : * : * : * : * : * : * : * : * : * : *         | 702<br>218 |
| XP_003744259.1_Phospholipase<br>PhospholipaseD-4-Pverdolaga | AKKAKSYPWLIPKSYDSAEDIEV--KLFGLYRCVQILRSASSWSAGISETENSIHSA<br>AKFDDVYPLLLPKCYEFPDPIPPILSSEVGSILMADCQVLRSTSMWSAGIITTEYSILNA<br>* * * * * : * : * : * : * : * : * : * : * : * : * : * : *         | 759<br>278 |
| XP_003744259.1_Phospholipase<br>PhospholipaseD-4-Pverdolaga | YVDLILKAKHFIYIENQFFISLQSPDNIVYNEVADALFTRIVGAFKAKEKFRVYIVLPLL<br>YKDAIMKAEHFIYIENQFFVSLQHGNKDVFNDSICLYQRIMKAHQENKRFQVYVIMPLL<br>* * : * : * : * : * : * : * : * : * : * : * : * : * : * : * : * | 819<br>338 |
| XP_003744259.1_Phospholipase<br>PhospholipaseD-4-Pverdolaga | PAFEGEVGTSGVSIQAIHWNYSNLCRGEYSLLERLKRVEDDPKEYIGFYGLRKHDMLN<br>PAFEGEVGTGTGLIQAVTHWNYSICRGPRLCQRLAKSIQDPLSYISFYGLRNFGLN<br>***** : * : * : * : * : * : * : * : * : * : * : * : *                | 879<br>398 |

|                                                             |                                                                                                                                     |             |
|-------------------------------------------------------------|-------------------------------------------------------------------------------------------------------------------------------------|-------------|
| XP_003744259.1_Phospholipase<br>PhospholipaseD-4-Pverdolaga | GIPVTELIYVHSKLMIVDDVQAIIGSANINDRSLGERSIAKWSQHFRLATFDGKP<br>NKLVTETLIYVHSKLMIVDDKKAIGSANINDRSLGRRDSEIAVLVNDVSFVSVMDGKP<br>*****      | 939<br>458  |
| XP_003744259.1_Phospholipase<br>PhospholipaseD-4-Pverdolaga | VKAGLYVSSLRRWIFREHLGIRDVEDPVADSFYSDVWKKIARRNTEIFEEVFKPLPTDCV<br>YKAGHFCSLRKALFKHLGLLGGKHSKVEX-----<br>*** : *** : * : *** : . : . : | 999<br>489  |
| XP_003744259.1_Phospholipase<br>PhospholipaseD-4-Pverdolaga | KTFAELRAYSRVSPLAIEDPSAALEKLRDVQGHVLELPERFLEDENLTAPPTTKESLMPT<br>-----                                                               | 1059<br>489 |
| XP_003744259.1_Phospholipase<br>PhospholipaseD-4-Pverdolaga | RLWT 1063<br>---- 489                                                                                                               |             |

**Pairwise alignments and amino acid sequences of phospholipases B translated from *Pamphobeteus verdolaga*.** Residues highlighted in grey indicate the signal peptide, while magenta blue highlighted residues, indicates the propeptide according to Spider|ProHMM from the arachnoserver. Residues highlighted in yellow shows cysteines potentially forming disulfide bridges.

#### PhospholipaseB-1-Pverdolaga:

LEAIVLSLFRDNNVFLYGVFAPPRLVSAS<sup>C</sup>SSVSL<sup>C</sup>MKNLSPEASDWKF<sup>C</sup>MMMLTLWVAIALLV  
HV<sup>C</sup>AASTEQKAYVTWDSSSYKFTVHSDPVENFVAYATFTNEINATGWSYLEVWNTNETFPDSV  
QAYSAGLAEGVLTADLLKKHWNVTATY<sup>C</sup>DGEESY<sup>C</sup>CDRLKIFLETNLDPMNYNIARRRKYV  
PYWHQVALALEQLSGLEDGYNNVSGKPHTKLNVTGVLMMVNIIFGDLEDLEGILNKTVSSRPL  
GSGS<sup>C</sup>CSGLIKVLPNNEDLYVSQDSWNTYSSMLRVLKKYNISVHSGMDRGSPVIPGQVMSFSSY  
PGLI<sup>C</sup>SGDDFYTISSGLATMETTIGNGNSSLWKYIRAKGTVLEWLSIVANRMARSGREWSRW  
FSIMNSGTYNQWMMVVDYNKFLPGAPLQNDLLWVLEQLPGYIHSDDLTDVLRKQGYWPSY  
NTPYFKDIFNLSGSQENADKYGDWFTYDKTPRALIFKRDHGTVDVKSMIKLMRYNDYTHD  
PLSR<sup>C</sup>N<sup>C</sup>TPPYSAENASAR<sup>C</sup>DLNPANGTYPFGALGHRSHGGIDMKLTTGSLFKNFEFVAFG  
GPTYDSLPPFKWSESDFRTERHEGHPDLWKFEPIVRKWSQ

CLUSTAL O(1.2.4) multiple sequence alignment

|                                                                             |                                                                                                                                                                                                     |  |
|-----------------------------------------------------------------------------|-----------------------------------------------------------------------------------------------------------------------------------------------------------------------------------------------------|--|
| XP_015925352.1_Phospholipase_B-like_Putative<br>PhospholipaseB-1-Pverdolaga | -----MLVSSVLC 9<br>LEAIVLSLFRDNNVFLYGVFAPPRLVSAS <sup>C</sup> SSVSL <sup>C</sup> MKNLSPEASDWKF <sup>C</sup> MMMLTLWVAIA 60<br>*****                                                                 |  |
| XP_015925352.1_Phospholipase_B-like_Putative<br>PhospholipaseB-1-Pverdolaga | LL---IALVKAKNASVTDQTTGKFQIHDIANDPVAYGTFTDEIFKVGWSYLEIKSYEK 66<br>LLVHVCAASTEQKAYVTWDSSSYKFTVHSDPVENFVAYATFTNEINATGWSYLEVWNTNET 120<br>** * . : * * * . : * * * . : * * * . : * * * . : *            |  |
| XP_015925352.1_Phospholipase_B-like_Putative<br>PhospholipaseB-1-Pverdolaga | YDPDIQAYAGVVEGYLTADLLRKHFNLVDGYCDGEEIYCDRLTSFLQENWDFIDSNVK 126<br>FPDSQAYAGVVEGYLTADLLRKHFNLVDGYCDGEEIYCDRLTSFLQENWDFIDSNVK 180<br>: * * * * * : * * * * * : * * * * * : * * * * * : * * * * * : *  |  |
| XP_015925352.1_Phospholipase_B-like_Putative<br>PhospholipaseB-1-Pverdolaga | VRRKYDVYWHQIALTFEQLHGLEGGYKNTSQPSTKVDLMGLLLNMGDLEDLEVLKK 186<br>RRRKYVYWHQVALALEQLSGLEDGYNNVSGKPHTKLNVTGVLMMVNIIFGDLEDLEGILNK 240<br>* * * * * : * * * * * : * * * * * : * * * * * : * * * * * : *  |  |
| XP_015925352.1_Phospholipase_B-like_Putative<br>PhospholipaseB-1-Pverdolaga | NMRRVLGSGHCSGLIKVLPNNKILFSQVTSWSTYTSMLRIKKYSLKLHTSLADGSPVI 246<br>TVSSRPLGSGHCSGLIKVLPNNEDLYVSQDSWNTYSSMLRVLKKYNISVHSGMDRGSPVI 300<br>* * * * * : * * * * * : * * * * * : * * * * * : * * * * * : * |  |
| XP_015925352.1_Phospholipase_B-like_Putative<br>PhospholipaseB-1-Pverdolaga | PGHTSTFSSQPGVLYSGDDFYVLSGLVAIETTFGNGDSSLWKYVVP-QTILEWQRIIA 305<br>PGQVMSFSSYPLGICSGDDFYTISSGLATMETTIGNGNSSLWKYIRAKGTVLEWLSIVA 360<br>* * * * * : * * * * * : * * * * * : * * * * * : * * * * * : *  |  |
| XP_015925352.1_Phospholipase_B-like_Putative<br>PhospholipaseB-1-Pverdolaga | NRLAKTGKQWTLFGILNSGTYNQWMMVVDYNKFKPGSLQDGLLYVLEQLPGYLHSEDR 365<br>NRMARSGREWSRWFSIMNSGTYNQWMMVVDYNKFLPGAPLQNDLLWVLEQLPGYIHSDDL 420<br>* * * * * : * * * * * : * * * * * : * * * * * : * * * * * : * |  |



## CLUSTAL O(1.2.4) multiple sequence alignment

```

P0DJ76|VKT4_Kunitz-type-theraphotoxin-Hs1e  MGIARILSAVLFLSVLFVTFPALLADHHDGRIDTCRLPSDRGRCKASFERYWYNGRTC 60
Kunitz-3-Pverdolaga  MGIRNICSVISVFVTLFALTFFPVFLAGYH---LDICRQRPDRGMCLVNMERWFFNGRFC 57
                        ***  *  *  *  *  *  *  *  *  *  *  *  *  *  *  *  *  *  *  *  *  *  *
P0DJ76|VKT4_Kunitz-type-theraphotoxin-Hs1e  AKFIYGGCGGNGNKFPEKACMKRCAKA 88
Kunitz-3-Pverdolaga  STFVYGGCGGNGNFIKKAQCMARCARG 85
                        .  *  *  *  *  *  *  *  *  *  *  *  *  *  *  *  *  *  *  *  *  *  *

```

**Kunitz-4-Pverdolaga:**

MLLMILVVASFQHSNADANGIDLCELDKEPGSCTSVINRYFFNRYSRRCERFIYTDCCGGNSNNF  
HYEFECCERTCPGDLYIGDVCSLPKKVGPCRAAMPRIYFNKETGRCEFTFYGGCSGNYNFETK  
EQCNSYCFQG

## CLUSTAL O(1.2.4) multiple sequence alignment

```

W4VSH9_Kunitz-type_U19-barytoxin-Tl1a  MNFELIYVSSLLLGICLANQADVVPSCNLPADAGMCYAYFPMFFYDASSRCKLNFIYGG 60
Kunitz-4-Pverdolaga  MLLMILVVA---SFQHSNADANGIDLCELDKEPGSCTSVINRYFFNRYSRRCERFIYTD 56
                        *  *  *  *  *  *  *  *  *  *  *  *  *  *  *  *  *  *  *  *  *  *
W4VSH9_Kunitz-type_U19-barytoxin-Tl1a  CGGNANRFWSEAECKCGGGGGGGSSDGSQKTAKMLNLDLGIDCSLEKKVGPCKAHMP 120
Kunitz-4-Pverdolaga  CGGNSNNFHYEFECERTCPG-----DLYIGDVCSLPKKVGPCRAAMP 98
                        ***  *  *  *  *  *  *  *  *  *  *  *  *  *  *  *  *  *  *  *  *  *  *
W4VSH9_Kunitz-type_U19-barytoxin-Tl1a  RYFFNRETGLCEEFIYGGCSGNHNNFQTEQCESFCAPGNSPREEETRKRTKQSY 176
Kunitz-4-Pverdolaga  RYFFNKETGRCEFTFYGGCSGNYNFETKEQCNSYCFQG----- 137
                        ***  *  *  *  *  *  *  *  *  *  *  *  *  *  *  *  *  *  *  *  *  *  *

```

**Kunitz-5-Pverdolaga:**

XYFLRNGCPSSTVCECTHSLGISRGNCCDSINSCHLIAKFPNXAEMHFTLACVFSLFCGICFANH  
NVPDTCPSLPPDAGMCYAYFPMFFYDAPSGACINFIYGGCGGNANRFWTEEECMNRCAGVG  
GTTKEPADEEKGPFLGPVDEGKGTISQKPIDEGKEVIIQKPVDEGKGAIYPQPTGGGKGVIFPQ  
PVAGGKGVIFQPPVGGGKGVTVQHAPQADICNQEKPQGNCSQIIRYFFDKDSKKCDTFMYS  
GCGKNDNNFNKYFECERTCSGEHDIGDTCNFKQDSGPCRAFFPRFYFSGESGQCEQFIYGGCQ  
GNHNNFKTKEECLQFCTSGKGSPLP

## CLUSTAL O(1.2.4) multiple sequence alignment

```

KFM65460.1_kunitz-type_serine_protease_inhibitor  MRALILLCAVTVAFASQDVCPENEHFQCGTACPDNCENYDTPARPCVLMISGCFCDKG 60
Kunitz-5-Pverdolaga  ----- 0
KFM65460.1_kunitz-type_serine_protease_inhibitor  FVRGEDGRCKIPESCPSQAEIVCPANQHFERCGTACPDTCEN---YQ-DTLRCPVLM 113
Kunitz-5-Pverdolaga  -----XYFLRNGCPSST--VCETTHSLGISRGNCCDSINSCHLIAKFPNXAEMHFTLA 51
                        :  *  *  *  *  *  *  *  *  *  *  *  *  *  *  *  *  *  *  *  *  *  *
KFM65460.1_kunitz-type_serine_protease_inhibitor  CVPGCFCDKGLVKAIDGSCIKPESCPSQAKPLVQNCEDKPERGMCLAYIPSYYYDKETGT 173
Kunitz-5-Pverdolaga  CVFSLFCG-----ICFAN-----HNVPDTCPSLPPDAGMCYAYFPMFFYDAPSGA 96
                        *  *  *  *  *  *  *  *  *  *  *  *  *  *  *  *  *  *  *  *  *  *
KFM65460.1_kunitz-type_serine_protease_inhibitor  CKKFIYGGCGGNGNRYATEEECKEKKGVTLAQTKSDDVCELPVATGPRCALFHRY--- 230
Kunitz-5-Pverdolaga  CINFIYGGCGGNANRFWTEEECMNRCAGVGGTKEPADEEKGPFLGPVDEGKGTISQKP 156
                        *  *  *  *  *  *  *  *  *  *  *  *  *  *  *  *  *  *  *  *  *  *
KFM65460.1_kunitz-type_serine_protease_inhibitor  -----FDSASGQCKKFIYGGCGGNENN--FKT-----LKECERTCGAGGVLGLA 272
Kunitz-5-Pverdolaga  IDEGKEVIIQKPVDEGKGAIYPQPTGGGKGVIFQPPVAGGKGVIFQPPVGGGKGVTVQHA 216
                        :  *  *  *  *  *  *  *  *  *  *  *  *  *  *  *  *  *  *  *  *  *  *
KFM65460.1_kunitz-type_serine_protease_inhibitor  LDRPDCAPETGVCRAIRRFYDQKEGMCKTFIYGGCGGNRNRFVTEECYNKCGALA 332
Kunitz-5-Pverdolaga  PQADICNQEKPQGNCSQIIRYFFDKDSKKCDTFMYSGCGKNDNNFNKYFECERTCSGEH 276
                        :  *  *  *  *  *  *  *  *  *  *  *  *  *  *  *  *  *  *  *  *  *  *
KFM65460.1_kunitz-type_serine_protease_inhibitor  S-MSACQQKEKGTGPKAAFRFYFNKQTGECEPFIYGGCGGNSNFFLDKEDCEAVCKA-- 389
Kunitz-5-Pverdolaga  DIGDTCNFKQDSGCPRAFFPRFYFSGESGQCEQFIYGGCGGNHNNFKTEECLEQCTSGK 336
                        .  *  *  *  *  *  *  *  *  *  *  *  *  *  *  *  *  *  *  *  *  *  *
KFM65460.1_kunitz-type_serine_protease_inhibitor  ----- 389
Kunitz-5-Pverdolaga  GSPLP 341

```

**Kunitz-6-Pverdolaga:**

VISVFTVLLALTFPPLFSADHHLDI CELPADSGT CFVRLHRWYFNGESC TKFLYRG CGGNENHF  
MTEVE CMAK CGGA

CLUSTAL O(1.2.4) multiple sequence alignment

```

B2ZBB6_Kunitz-type-theraphotoxin-Hs1b      MGIARILSAVLFLSVLFVWTFPALLSADHHDGRIDTCRLPSDRGRCKASFERWYFNGRTC 60
Kunitz-6-Pverdolaga                        -----VISVFTVLLALTFPPLFSADHH---LDICELPADSGTCFVRLHRWYFNGESC 49
                                         . . . * . . . * . . . * . . . * . . . * . . . * . . . * . . . *
                                         . . . * . . . * . . . * . . . * . . . * . . . * . . . * . . . *

B2ZBB6_Kunitz-type-theraphotoxin-Hs1b      AKFIYGGCGGNGNKFPTEACMKRCGKA 88
Kunitz-6-Pverdolaga                        TKFLYRGCGGNENHFMTVEECMAKCGGA 77
                                         . * . * . * . * . * . * . * . * . * . * . * . * . * . * . *
                                         . * . * . * . * . * . * . * . * . * . * . * . * . * . * . *

```

**Kunitz-7-Pverdolaga:**

XTSC KGIKES CTLDRAEAK EICMMPKEIG PCRGYFHRWYFDVNTLT C VTFVYGG C RGNNNNF  
EFQRDC VRT CEPLFKASGNEDPSNVSTHDVAQGNSPID CMVTPWX

CLUSTAL O(1.2.4) multiple sequence alignment

```

XP_002435922.1_secreted_protein_Kunitz_domain_(Partial)  -----FPEICLLPKDIGPCRGYFPRWYDSTKRMCLQFVYGGCRGNRN 43
Kunitz-7-Pverdolaga  XTSC KGIKESCTLDRAEAK EICMMPKEIGPCRGYFHRWYFDVNTLT C VTFVYGGCRGNNN 60
                                         . * . * . * . * . * . * . * . * . * . * . * . * . * . * . *
                                         . * . * . * . * . * . * . * . * . * . * . * . * . * . * . *

XP_002435922.1_secreted_protein_Kunitz_domain_(Partial)  RFERYECNKMCEVTISR----- 61
Kunitz-7-Pverdolaga  NFEFQRDCVRTCEPLFKASGNEDPSNVSTHDVAQGNSPIDCMVTPWX 107
                                         . * . * . * . * . * . * . * . * . * . * . * . * . * . * . *
                                         . * . * . * . * . * . * . * . * . * . * . * . * . * . * . *

```

**Kunitz-8-Pverdolaga:**

DAGTC FASIPRWYFTGSK CRSFIYGG CGGNANNFDTELXMPKEMWKEMKRVTSHFTTETGT A  
QNPSSGYLEVFEVRIV

CLUSTAL O(1.2.4) multiple sequence alignment

```

B2ZBB6_Kunitz-type-theraphotoxin-Hs1b      MGIARILSAVLFLSVLFVWTFPALLSADHHDGRIDTCRLPSDRGRCKASFERWYFNGRTC 60
Kunitz-8-Pverdolaga                        -----DAGTCFASIPRWYFTGSKC 19
                                         . * . * . * . * . * . * . * . * . * . * . * . * . * . * . *

B2ZBB6_Kunitz-type-theraphotoxin-Hs1b      AKFIYGGCGGNGNKFPTEACMKRCGKA----- 88
Kunitz-8-Pverdolaga                        RSFIYGGCGGNANNFDTELXMPKEMWKEMKRVTSHFTTETGT A QNPSSGYLEVFEVRIV 79
                                         . * . * . * . * . * . * . * . * . * . * . * . * . * . * . *
                                         . * . * . * . * . * . * . * . * . * . * . * . * . * . * . *

```

**Kunitz-9-Pverdolaga:**

QVATLHPPEAEKENLRNYVQRFP TGVMKSSLGV CELEKNSGP CAKSYKRWYYDAISKD CLP  
FSYGG CLGNENRFRTKAACEET CKN

CLUSTAL O(1.2.4) multiple sequence alignment

```

XP_011135446.1_kunitz-type_serine_protease_inhibitor  -----MGLKSCLLFTLIIVGILSHEIVAKPSSICQLPKVVGPCASLKRYRYD 48
Kunitz-9-Pverdolaga  QVATLHPPEAEKENLRN-----YVQRFPTGVVMKSSLGVCELEKNSGP C AKSYKRWYYD 54
                                         . * . * . * . * . * . * . * . * . * . * . * . * . * . * . *

XP_011135446.1_kunitz-type_serine_protease_inhibitor  STTGQCEEFYGGCKGNENNFITREVCQENCINN 82
Kunitz-9-Pverdolaga  AISKDCLPF SYGGCLGNENRFRTKAACEETCKN- 87
                                         . * . * . * . * . * . * . * . * . * . * . * . * . * . * . *
                                         . * . * . * . * . * . * . * . * . * . * . * . * . * . * . *

```

**Kunitz-10-Pverdolaga:**

XLKLPPKMMKLLWVNLLLLVLAT CLC SEKTDKTNNGIC NQRMDSGNGNQ RITHFYDYDTGRQ  
K CHFPYPYSGRGGNKNNFSTMQE CKKRM P

CLUSTAL O(1.2.4) multiple sequence alignment

```

XP_012273912.1_kappaPI-actitoxin-Avd3d  -----MIANFVLPLVLLACLCAAPSKTAPTVCLEPMVKGNCRALMPRYRYDSRA  50
Kunitz-10-Pverdolaga                    XLKLPPKMKLLWVNLNLLVLATCLCEKTDKTNNGICNQRMDSGNGNQRIHFYDITGR  60
                                         ::  *  ***  :***:  *  *  *  *  *  *  *  *  *  *  *  *  *  *  *  *  *
XP_012273912.1_kappaPI-actitoxin-Avd3d  KDCLPFNYGGCGGNRNINFLSREQCMETCKGV  81
Kunitz-10-Pverdolaga                    QKCHFPYPSGRGGNKNFESTMQECKRMP--  89
                                         :. *  *  *  *  *  *  *  *  *  *  *  *  *  *  *  *  *

```

**Kunitz-11-Pverdolaga:** MRKSIMGTQVQGFRSSSPGALMSRVMASSTTLFFSGKVYLQA

CLUSTAL O(1.2.4) multiple sequence alignment

```

B2ZBB6_Kunitz-type-theraphotoxin-Hs1b  -----MG-----IARILSAVLFSLVLFVTFPALLSADHHDGRIDTCRLPSDRGRCKASF  50
Kunitz-11-Pverdolaga                    MRKSIMGTQVQGFRSSSPGALM-----SRVMAST  29
                                         **  :  .  *  :
B2ZBB6_Kunitz-type-theraphotoxin-Hs1b  ERWYFNGRTCAKFIYGGCGGNNGKFPQTQECMKRCGKA  88
Kunitz-11-Pverdolaga                    TLCFFSGKVYLQA-----  42
                                         :*  *  *  :

```

**Kunitz-12-Pverdolaga:**

MLLRNDVSRRRIMIKVSRQRFSLTFDLEDFCTAKDENNTDCQTLPA GDPTCY YDNC PMFY YD  
TSSSTCMNVEYGGCGGKANRFWTEKECTDQCKNKEDDVANGAASEYSIGVSWLKV KYPFL

CLUSTAL O(1.2.4) multiple sequence alignment

```

W4VSH9_Kunitz-type_U19-barytoxin-T11a  -----MNFELIYVSSLLLGICLANQADVPSDC-NLPAD-AGMCYAY  40
Kunitz-12-Pverdolaga                    MLLRNDVSRRRIMIKVSRQRFSLTFDLEDFCTAKDEN-NTDCQTLPA GDPTCY YD  56
                                         *  *  *  *  *  *  *  *  *  *  *  *  *  *  *  *  *
W4VSH9_Kunitz-type_U19-barytoxin-T11a  FPMFFYDASSRKCLNFIYGGCGGNANRFWEAECEKCGGGGGGGSSDGSQKTAKMLNL  100
Kunitz-12-Pverdolaga                    CPMFY YDTSSSTCMNVEYGGCGGKANRFWTEKECTDQCKNKEDDVANGAASEYSIGV-  113
                                         ***  *  *  *  *  *  *  *  *  *  *  *  *  *  *  *  *  *
W4VSH9_Kunitz-type_U19-barytoxin-T11a  DLGDISCLSEKKVGPCKAHMPRYFNRGTGLCEEFIYGGCSGNHNNFQTKEQCSFCAPGN  160
Kunitz-12-Pverdolaga                    -----SWLKV KYPFL-----  124
                                         *  *  *  *
W4VSH9_Kunitz-type_U19-barytoxin-T11a  SPRPEETTRKRTKQSY  176
Kunitz-12-Pverdolaga                    -----  124

```

**Kunitz-13-Pverdolaga:**

MGIARIFSVVSLFVFLALTFPPLFSADHHEGTDICYLPPERGVCKAYSEQWHFNGRRCAKFVF  
GGCGGNANRFPTKDECI RRCRKA

CLUSTAL O(1.2.4) multiple sequence alignment

```

P68425_Kunitz-type-theraphotoxin-Hs1a  MGIARILSAVLFSLVLFVTFPALLSADHHDGRIDTCRLPSDRGRCKASFERWYFNGRTC  60
Kunitz-13-Pverdolaga                    MGIARIFSVVSLFVFLALTFPPLFSADHHEG-TDICYLPPERGVCKAYSEQWHFNGRR  59
                                         *****  *  :  *  *  *  *  *  *  *  *  *  *  *  *  *  *  *  *  *
P68425_Kunitz-type-theraphotoxin-Hs1a  AKFIYGGCGGNNGKFPQTQECMKRCAKA  88
Kunitz-13-Pverdolaga                    AKFVFGGCGGNANRFPTKDECI RRCRKA  87
                                         ***  *  *  *  *  *  *  *  *  *  *  *  *  *  *  *  *

```

**Amino acid sequences of Hyaluronidases translated from *Pamphobeteus verdolaga*.** Residues highlighted in grey indicate the signal peptide, while magenta blue highlighted residues, indicates the propeptide according to Spider|ProHMM from the arachnoserver. Yellow highlighted residues indicate



the cysteine position on hyaluronidase-like sequence (Cys17, Cys176, Cys183, Cys196, Cys218, Cys307, Cys332, Cys337, Cys343, Cys372, Cys374 and Cys383).

#### Hyaluronidase-1-Pverdolaga:

PRMYQSKLLQGLFPNSKDLPSVLLLDSEGA VKVIGH SRLSRVLEDNRG CWIASVIISKEKRG  
QGLGKFLMMKTEEYAKVLGLTTAYLNTRDKQGFYEHLGYSY NPVSPHKGSFSMNGVGHL  
NFHRQVLRRC EEGETNHSGSPVGD PKIAKSSSVSSAKTSTPPLPPPPPPSSSNVKTD CFTSATG  
HNWMKKYL

#### Hyaluronidase-2-Pverdolaga:

MSVTLFLLLLLP CYTRQAEDPTVFTVRWNVPTIQ CRKTYGMDFVPLLKSYGILVNSGDEFKGEV  
NTIFYESQLGLYPHLDQSGQRVNGGIPQLGDLPEHLKNAREDINKAIPDINFNGLGIIDWESWR  
PVWNFNW GALKKYQDES FQEAL KQHPGWTND SLWQLAQQEWETSAKNFMLET LRLAQTM  
RPN SLW CYLFPD CYN YNGQTPREFR CPSIVVTGNNQLSWLWHESKAV CPSLYVADGYLQKY  
TFEQRTWYVDGRLKEALRVAPNSQLYPYIGYGYGVTPGAMVPEDDFWRILAQVASAGSSGTVI  
WGASATLR SKDN CQLLQKYVKDILGPSVTIVKENAER CAKTM CNGKGR CTWLNDPNVIAWR  
VYLDNRNHPFQRSEIT CH CVEGYSGRY CDVQRRVINQTKLRVSFKLSLDLYTLRRLLDN

#### Amino acid sequences of Lycotoxin translated from *Pamphobeteus verdolaga*.

Residues highlighted in grey indicate the signal peptide, while magenta blue highlighted residues, indicates the propeptide according to Spider|ProHMM from the arachnoserver. Yellow highlighted residues indicate the cysteine disposition commonly described in the ICK peptides.

#### Lycotoxin-1-Pverdolaga:

MEGR TKLLFLIAVFSIMHVITAELY CPQRLRIY CYVRTDR CCS DSDCGGGTIC CEENC GNTC RTP  
RIIQSGGTRVDP SQI CKIG

#### Lycotoxin-2-Pverdolaga:

MDRLLMLFVTLAVLA QVLIVSPFMATSDADREILADYPDVTRYLYYNRKRS CIKRGGS CDHR  
PND CCYNSS CRC NLWGTN CRC QRMGLFQKWGK

#### Lycotoxin-3-Pverdolaga:

MGKITEVLLIFLI CVLAIALVISAEVY CPAKSSII CKRSITK CCS DQDCPRGRI CCQEN CGNQ CNIP  
SSVQTNGSKVLSDT CKIGQF

#### Lycotoxin-4-Pverdolaga:

XNARARSMDFLDADNREATLPPENKLGSGQGRVKSEHELRIERSLQNL TIPDWYKQSPW  
SKKPKEGFILRRX

**Amino acid sequences of CRISP proteins translated from *Pamphobeteus verdolaga*.** Residues highlighted in grey indicate the signal peptide, while magenta blue highlighted residues, indicates the propeptide according to

Spider|ProHMM from the arachnoserver. Red highlighted residues indicate the cysteine disposition commonly described in the ICK peptides.

#### CRISP-1- Pverdolaga:

MNHVLLVLLAVTIC<sub>1</sub>YAVPRLSRPKIYGNAIPYRDLDTN<sub>2</sub>GATKKKIVLMHNFFRSRVQPSAS  
DMLAMSWHEGAAEDAQRWAES<sub>3</sub>Q<sub>4</sub>LLLDHNTTGRWTQDFGT<sub>5</sub>CGQ<sub>6</sub>NIFVANVQVPWF<sub>7</sub>FAAK  
VWFLERDNFTY<sub>8</sub>GKNVNDPDVVG<sub>9</sub>HYTQMVWYSTHRVGC<sub>10</sub>GFHYCGPDVTKVPYYSYV<sub>11</sub>C<sub>12</sub>NY<sub>13</sub>CP  
IGNHPERFDRPYTRGKPC<sub>14</sub>SAC<sub>15</sub>PGQ<sub>16</sub>CKFKKLC<sub>17</sub>TNT<sub>18</sub>CPHADTWIN<sub>19</sub>CRELNETWHDWL<sub>20</sub>CGNEQN  
EGHQA<sub>21</sub>CKAT<sub>22</sub>C<sub>23</sub>CEGAIR

#### CRISP-2- Pverdolaga:

MRIRVILMLSWLWLGVS<sub>1</sub>DGSCPALYRRYSKAHTYCLPPKSSSTILKSGISKSDIETIVRVHNELRS  
KVATGEETYSMPKASNM<sub>2</sub>RQMVWDSELA<sub>3</sub>AVAQKHANQCLFKHDCNNCRKVKNFDV<sub>4</sub>GQN  
LFKRNPFVPPQPTWAQAVTDWYSEVNVFDQ<sub>5</sub>QGIDGFIDGEGPPQTGHFTQDIWAESWRVGC  
GYSVCEE<sub>6</sub>GNVLELYTCNYGPAGNGENDPIYERGD<sub>7</sub>PCTNCPLNSCCGSSCSGGTSYPGLCRISG  
ENAPQYNRPEGLTFYCSFNNEHDCAKTVTGHNKWQVSKTL<sub>8</sub>SGSYIGIVLNGGESSTLSFKNPA  
KVPQKPLCFIINYRTGPQVDGEEVSGTANVIFKAGGSTF<sub>9</sub>SELNSNGFQSF<sub>10</sub>TKFSITLGWNMPT  
MIDISISVPEGSSRYLEIKDMSATKESARTMALSSLLSGHYARTMELSSLLSGHYARTMELSSLL  
SGHYARTMX

#### CRISP-3- Pverdolaga:

MLEMSWHKEAQESAQRWAE<sub>1</sub>EC<sub>2</sub>QILTYDGILGKYVEDYGS<sub>3</sub>CGQ<sub>4</sub>NIFVSNEKVPWTFVGEAWF  
AERYDFSYSYNSVSEVGHYTQMVWNGSHRLG<sub>5</sub>GFHYCAKDVKKPFYNYV<sub>6</sub>C<sub>7</sub>NY<sub>8</sub>CPMGND  
PKRLGMPYSSGKPC<sub>9</sub>SECIKHCKYKKLC<sub>10</sub>TNT<sub>11</sub>CPYADLWVNCAQLNVTWNDWL<sub>12</sub>CSNPEHQRH  
RG<sub>13</sub>CRATCLCPGKVI

**Amino acid sequences of Hephaestin-like protein translated from *Pamphobeteus verdolaga*.** Residues highlighted in grey indicate the signal peptide, while magenta blue highlighted residues, indicates the propeptide according to Spider|ProHMM from the arachnoserver. Red highlighted residues indicate the cysteine disposition commonly described in the ICK peptides.

#### Hephaestin-1- Pverdolaga:

MPTNLKIAIALTA<sub>1</sub>AVMALVTAVILAVVLTS<sub>2</sub>AKSVKTEAQQNVRTFYFAAE<sub>3</sub>EVLWDYAPRETD  
LLKERREDAGSSLEES<sub>4</sub>EDPLRLGKRYKKA<sub>5</sub>VFREYTDSTYSEAKSHPEWL<sub>6</sub>GILGPLIETEVGDIVKI  
NVYNNATHPVSLH<sub>7</sub>THGARYLKHHEGAFYQDNT<sub>8</sub>PKRDDKVFPGENYTYTWQISENRGP<sub>9</sub>TES  
DTPCMLWAYHSHVSGDEDIHTG<sub>10</sub>LLGPLLI<sub>11</sub>CRQGYLDTMYEHSEFSGRRHFVLLFLIFDENQSW  
YLDENIAVKRTNTTQGNTEEIKENEQFQESNLMYSVNGLMYDNLKGLRM<sub>12</sub>CHGSQVTWYLMG  
MGNEADIIHAIT<sub>13</sub>PGHPLL<sub>14</sub>VREHRTDVVHL<sub>15</sub>FPK<sub>16</sub>FESALMTSNREGSWPIK<sub>17</sub>CEVGDAHIVGME  
ARFSVRQCGNRNTSEMSSQTGQVREFFIAAEETVWNYAPTGIN<sub>18</sub>KMN<sub>19</sub>GIPL<sub>20</sub>NDSEAAPFFERG  
ENRIGGTYKKVVYRGYMDQH<sub>21</sub>FTEPLHHPAHLG<sub>22</sub>LLGPTIRAEVGETVRVHFFNKATKAYAFQL  
TAFV<sub>23</sub>CSDCEMAGQNKSVAPSGNRTYSFVIREDLGSPKDPQCIPWRYFSAVEHLKDIYGG<sub>24</sub>LNG  
VLLI<sub>25</sub>CRPGTLKADGTQKNVDKEFTLMFAVMDENKSPYIDENIAEYTTSGDNVDKEDEDFVESN  
LMHSINGLMYGHLDGLE<sub>26</sub>MC<sub>27</sub>VNDNVSWNLFAIGAVVDMHVVYFSGNTILRDGLYRDTVDVM  
PSGHQIVSMNPDLLGKWPMT<sub>28</sub>CRTNDHLRGGMKARYEVKS<sub>29</sub>C<sub>30</sub>NHNGDVLSGGSQDLTADDKI  
RKYFIAAVDEEWDYAPFDYHIVTGENLTENENSRI<sub>31</sub>FVTRDATHIGSKYMK<sub>32</sub>TLYREFTDSSFSQR  
KTRTP<sub>33</sub>EEHLG<sub>34</sub>LLGPV<sub>35</sub>IKAEVGETIQV<sub>36</sub>FRNKAS<sub>37</sub>RKFNI<sub>38</sub>HTHGLPENSSQLYGV<sub>39</sub>EPGGTQTYIW

KVPQRSGPTPGSFNCSSWMYYSAVDSIKDINTGLVGPLIICNPGILTNSGSRTDVDKEFSVLFTVF  
DENESWYLEENVNNYCFEPEKVDVEDEDFKESNLKHSLNGLLYGALRGLGGTVGDTVAVWL  
MGLGNEIDIHTAHFHGMSFVEKDDPLAGPKGHKADVTDLFPGFRTVEMTFDTPGTWLFHCH  
VDDHLKGGMIALVTVNDRNATTLH

#### Hephaestin-2- Pverdolaga:

XGSKGTAFMRLSCPGRIPEASGQRPLHYSVNGRIYGTLEGLVAKNGTKTAWYLLGMGSEDDL  
HTAHFHGQTFLQRTDTRRGDVVDLFPGYFDTVEMINDNPGTWILHCHVDDHMRYGMAAL  
FTVTP

**Amino acid sequences of venom metalloproteinase translated from *Pamphobeteus verdolaga*.** Residues highlighted in grey indicate the signal peptide, while magenta blue highlighted residues, indicates the propeptide according to Spider|ProHMM from the arachnoserver. Red highlighted residues indicate the cysteine disposition commonly described in the ICK peptides.

#### Metalloproteinase-1- Pverdolaga:

XGKHVVYKRKFPIVKGLPTDYVTMDSEKMLNNTKHRSKRQAVPDTVWPEVLLVVDYETFIL  
HGGNSRDVKRYFISFFNGVDLRYKLLHHPVRISLAGMIVAKDRDATPYLERNRLRPPNADAV  
DAAGALTDMGKYLYREHRLPTYDLAVVITKLDMCRRRFPGGRCNRGTAGFAYVGGACVNV  
KRLEKVNVAIIEDSGGFSGIIVAAHEIGHLLGVHDGSPPPSYLGGPGATHCPWEDGFIMSDL  
RHTERGFKWSSCSVEQFKHFLHGETATCLYNFPHENDLLVRVLPGTMLTLDEQCKRDRGTTA  
CFKDARVCAQLFCFDTASGYCVSYRPAAEGSPCGDGQVCKNGRCLAEIENIIPDFSHVTETYVE  
AEERMDRSEEEITKSTDTTTFPSRRARIRRLYRGPNSRLRSTVPKENLPTISTGFPPKNDPSRNMK  
TRL

**Section S2.** Full-length translated sequences for putative protein ORFs corresponding to proteins matching housekeeping and cellular process proteins.

#### Amino acid sequences of contig c6436\_g1\_i1 translated from *Pamphobeteus verdolaga*.

MCDDDDVAALVVDNGSGMCKAGFAGDDAPRAVFPISVGRPRHQGVMVGMGQKDSYVGDEA  
QSKRGILTLKYPIEHGIVTNWDDMEKIW

#### Amino acid sequences of contig c62193\_g1\_i1 translated from *Pamphobeteus verdolaga*.

TQIMFETFNTPAMYVAIQAVLSLYASGRRTGIVLDSGDGVSHTVPIYEGYALPHAILRLDLAGR  
DLTDYLMKILTERGYSFTTTAEREIVRDIKEKLCYVALDFEQEMATAASSSSLEKSYELPDGQVIT  
IGNERFRCPEALFQPSFLGMESCGIHETTYNSIMKCDVDIRKDLANTVLSGGTTMYPGIADRM  
QKEITALAPSTMKIKIIPPERKYSVW

#### Amino acid sequences of contig c13011\_g1\_i1 translated from *Pamphobeteus verdolaga*.

XEKIWHHTFYNELRVAPEEHPVLLTEAPLNPKANREKMTQIMFETFNTPAMYVAIQAVLSLYA  
SGRTTGIVLDSGDGVSHTVPIYEGYALPHAILRLDLAGRDLTDYLMKILTERGYSFTTTAEREIV  
RDIKEKLCYVALDFEQEMATAASSSSLEKSYELPDGQVITIGNERFRCPEAMFQPSFLGMESCGI  
HETTYNSIMKCDVDIRKDLYANTVLSGGTMYPGIADRMQKEITALAPSTMKIKIIPPERKYS  
VWIGGSILASLSTFQX

**Amino acid sequences of contig c15096\_g1\_i3 translated from *Pamphobeteus verdolaga*.**

MEASHVTEDHINDESRSSESTNSMSHSRKYRATQHRVFNRSLSHLEKIKFFGFDMDYTLAQYN  
SPEYEALQFRLMVGRMISIGYPAELKDFEYDPTFPIRGLWFDTTYGNLLKVDAYGNILVCCHGF  
QFLKTSEIYNLYPNKFIQHDESRIYILNTLNLPEAYLLACLVDFFSNPQYTPSKTGKTNIFMS  
YKSIFQDVRDAIDWVHMQGSLEKEETVNNIDKYVNKEDRLPMLFDRIHEVGKKTFLTNSTDYD  
YTAKIMSYLEFDHPKSGGRDWKSYFDYILVDARKPLFFGGGTTLRQVDTGTGALRIGIHVGPLH  
PGQVYSGGSCDVFTSLIGAKGKDVLYVGDIHYGDILKSKKTRGWRTFLIVPELQREVHVWTSK  
WQLFNRLQELDIQLGDTYKDLDSCKDEPDISELMAIREVSHELDMSYGILGSTFRSGSRQTF  
ANQICHYADLYACTFLNLMYYPFSYMFAPPMLMPHESTVEHDEGSIVNGEAYELEEEQVQE  
PMRRRSRLEHSESSVPHLFAETPEAVTHHHDTDDEDEDTKSGEH

**Amino acid sequences of contig c27174\_g1\_i1 translated from *Pamphobeteus verdolaga*.**

MAKVPAIGIDLGTYSYCVGVFQHGKVEIANDQGNRTTPSYVAFTDTERLIGDAAKNQVAMN  
PSNTVFDKRLIGRRFEDPSVQSDMKHWPFDVVS DSGPKIQVEYKGETKTFYPEEISSMVLTK  
MKEIAEAYLGKTVTNVAVVTPAYFNDSQRQATKDAGTIAGLNVLRINEPTAAAIAYGLDKK  
GQGERNVLIFDLGGGTFDVSILTIEDGIFEVKSTAGDTHLGGEDFDNRMVNHVQEFKRKHKK  
DLTTNKRALRRLRTACERAKRTLSSSTQASIEIDSLFEGVDFYSTITRARFEELNADLFRSTLEPVE  
KALRDAKLDKAQVHDIVLVGGSTRIPKIQKLLQDFFNGKDLNKSINPDEAVAYGA AVQAAIL  
NGDKSEQVQDLLLLDVTPSLGIETAGGVMTVLIKRNTPITRQTQTFTTYSNQPVGVLIVQVE  
GERAMTKDNNLLGKFELTGIPAPRGVPQIEVTFDIDANGILNVSAVDKSTGKENKITITNDKG  
RLSKEEIERMVKDAEKYKDEDDKQKCRISKSNSLESYAFNVKSTVEDDKLKEKISEDDKKKVL  
KVNETLRWLDSNQLADKEEYEHKQKELEGVCTPIITKLYQGAGGAPGMPGFPGAGAAPGG  
GGTGSGGPTIEVD

**Amino acid sequences of contig c15743\_g1\_i1 translated from *Pamphobeteus verdolaga*.**

MPAIGIDLGTYSYCVGVFQHGQVEIANDQGNRTTPSYVAFTDTERLIGDPAKSQVVLNPENTV  
FDKRLIGRKHDDPKIASDLKHWPQVCDAGGPKISVMYKGEKKLFNPEEISAMVLTCKMKE  
TAEMYLGKVTAEVITVPAYFNDSQRQATKDAGIAGLNVLRINEPTAAALAYGLDKNLQGE  
KNVLIFDLGGGTFDVSILTIDEGSLFEVRATAGDTHLGGEDFDNRMVNHFIIEFKRMHKKDL  
QGNARALRRLRTACERAKRTLSSGTEASIEIDALYQGIDFYSKITRARFEELCMDLFRSTLEPVEK  
ALTDKMDKNSIHVVVLVGGSTRIPKIQKLLRDFNGKELCMSINPDEAVAYGA AVQA AVL  
GDKSEKIRDVLLVDVAPLSLGIETAGGVMKIVQRNSRIPCKTSQIFTTYSNQPVGVTIQVFEGE  
RAMTKDNNHLLGKFDLSGIPPAQRGVPQIEVTFNLDANGILQVSACDKGTGKLQSIQITNDKGR  
LTKEEIERMLAEAEKYQDEKQREKVSARNSLESYVYSVKQAASSVDNNRLSETDKKKVNDT  
CDDVIRWLDNNTLAEKEEIEYKMKEVQSQLSPIMTKLHQAGGSPNNYSENSSATSSGPTVEEV  
D

**Amino acid sequences of contig c10792\_g1\_i2 translated from *Pamphobeteus verdolaga*.**

MAKVPAIGIDLGTTYSCVGVFQHGKVEIANDQGNRTTPSYVAFTDTERLIGDAAKNQVAMN  
PSNTVFDKRLIGRRX

**Amino acid sequences of contig c2143\_g1\_i2 translated from *Pamphobeteus verdolaga*.**

MARTKQTARKSTGGKAPRKQLATKAARKSAPSTGGVKKPHRYRPGTVALREIRRYQKSTELLI  
RKLPFQRLVREIAQDFKTDLRFSAAIGALQEASE

**Amino acid sequences of contig c16774\_g1\_i2 translated from *Pamphobeteus verdolaga*.**

XGKQLEDGRMLSDYNIQKESTLHLVLRRLRGGMQIFVKTLTGKTITLEVEPSDTIENVKAKIQDK  
EGIPPDQQRLIFAGKQLEDGRTLSDYNIQKESTLHLVLRRLRGGMQIFVKTLTGKTITLEVEPSDTI  
ENVKAKI

**Amino acid sequences of contig c17180\_g4\_i1 translated from *Pamphobeteus verdolaga*.**

MCDDIAALVVDNGSGMCKAGFAGDDAPRAVFPISVGRPRHQGMVMVGMGQKDSYVGDEA  
QSKRGILSLKYPIEHGIITNWDDMEKIWHHTFYNELRVAPEEHPILLTEAPLNPKANREKMTQI  
MFETFNAPAMYVAIQAVLSLYASGRITGIVLDSGDGVSHTVPIYEGYALPHAILRLDLAGRDLT  
DYLKILTERGYSFVTTAEREIVRDIKEKLCYVALDFEQEMATAASSSTVEKSYELPDGQVITIG  
NERFRCPETLFQPSFIGMESVGIHETTFNSIQKCDIDIRKDLANTVLSGGTMYPGIADRMQKE  
ITALAPSTMKIKIIPPERKYSVWIGGSILASLSTFQQMWISKQEYDESGPSIVHRKCF

**Amino acid sequences of contig c16820\_g1\_i1 translated from *Pamphobeteus verdolaga*.**

AAAIAYGLDKKGQGERNVLIFDLGGGTFDVSILTIEDGIFEVKSTAGDTHLGGEDFDNRMVNH  
FVQEFKRKHKKDLTTNKRSLRRLRTACERAKRTLSSSTQASIEIDSLFEGVDFYSTITRARFEELN  
ADLFRGTLEPVEKALRDAKLDKAQIHDLVLVGGSTRIPKIQKLLQDFNKGDLNKSINPDEAVA  
YGA AVQAAILNGDKSEQVQDLLLLDVTPSLGIETA

**Amino acid sequences of contig c9831\_g1\_i1 translated from *Pamphobeteus verdolaga*.**

XLNGSPIPLPCADSRKFLPLLVEASHSRVTYVLSGVLYNLLYNPAVQLIKSNMPAIGIDLGTTY  
SCVGVFQHGKVEIANDQGNRTTPSYVAFTDVERLIGDPAKSQAAMNPENTVFDKRLIGRRY  
DDPKIAADIKNWPFEVCNVGGKPKVGVLYKGENKMFNPPEISAMVLTCKMKETAEMYLGKLV  
TDAVVTVPAYFNDSQRQATKDAGAIAGLTVLRINEPTAAALAYGLDKNLKGEKVLIFDLGG  
GTFDVSILTIDEGSLFEVKATAGDTHLGGEDFDNRMVNYFVEEFHRKHKKDLRSPRAIRRLRT  
ACERAKRTLSSSTEAGIEVDAIFEGIDLYSKISRARFEELCIDLFRSTLEPVERALSDAKMNKASIH  
DVVLVGGSTRIPKIQKLLRDFNKGELCMSINPDEAVAYGA AVQA AVLSGDTSKNIRDVLLVD  
VIPLSLGIETAGGVMTKIVGRNSRIPCKTSQDFTTYSNQTSTVTVQVYEGERAMTKDNHLLGKF  
NLGIPVPVPRGVPRIEVTFNLDNGLHVS AVEKSSGKSQSIRITNDKGRLSKQEIDRMLEDADK  
YQREDEIQREKVAARNLTESYLYSVKQGADSANYSSLSPSDKAKVNNICEDAIRWLDNNSLAE  
KEEILYKNKEVQAQLSPIMTKLHQRSSSGPIIEVD

**Amino acid sequences of contig c16774\_g1\_i2 translated from *Pamphobeteus verdolaga*.**

XGKQLEDGRMLSDYNIQKESTLHLVLRLRGGMQIFVKTLTGKTITLEVEPSDTIENVKAKIQDK  
EGIPPDQQRLLIFAGKQLEDGRTLSDYNIQKESTLHLVLRLRGGMQIFVKTLTGKTITLEVEPSDTI  
ENVKAKI

**Amino acid sequences of contig c14336\_g1\_i1 translated from *Pamphobeteus verdolaga*.**

XGIETAGGVMTVLIKRNTTIPTRQTQTFTTYSNQPGLVLIQVYEGERAMTKDNNLLGKFELTGI  
PPAPRGVPQIEVTFDIDA

**Amino acid sequences of contig c51913\_g1\_i1 translated from *Pamphobeteus verdolaga*.**

DIKEKLCYVALDFEQEMATAASSSSLEKSYELPDGQVITIGNERFRCPEALFQPSFLGMESCGIH  
ETTYNSIMKCDVDIRKDLANTVLSGGTTMYPGIADRMQKEITALAPSTMKIKIAPPERKYSV  
WIGGSILASLTFQQMWSKQYDESGPSIVHRKCF

**Amino acid sequences of contig c2143\_g1\_i2 translated from *Pamphobeteus verdolaga*.**

MARTKQTARKSTGGKAPRKQLATKAARKSAPSTGGVKKPHRYRPGTVLREIRRYQKSTELLI  
RKLPFQRLVREIAQDFKTDLRFQSAAGALQEASE

**Amino acid sequences of contig c4667\_g1\_i1 translated from *Pamphobeteus verdolaga*.**

MARTKQTARKSTGGKAPRKQLATKAARKSAPSTGGVKKPHRYRPGTVLREIRRYQKSTELLI  
RKLPFQRLVREIAQDFKTDLRFQSAAGALQEASEAYLVGLFEDTNLCAIHAKRVTIMPKDIQL  
ARRIRGERA

**Amino acid sequences of contig c15300\_g1\_i1 translated from *Pamphobeteus verdolaga*.**

MFLKLPDVAQLCHAXTEENSAVKHRGHFRKWLTNPVRKLSHGRLDRSSSDNPKTSVKKPCPD  
PTKVVNSKEEMGNKSSSPGPIKHAEGDIEPEVTVENTAPEVSPEAPDVNGESTDATSTCPVIP  
SSSEAEGNSSAAVNLEPEGEPEEQVEQSSSEDNCPLTEQSNESKFLEHEEIEKALQKRKFVLQELVT  
TEKQYVKDLGSLVEGYIELMKSGEITMPEDLKNKGDKIVFGNIEAIYEWHRDLFCAELEKCLEE  
PERLGLLFRRYERRLNMYVVYCQNKPKSEYIVSEYLDTFEERQKLGHKLQLPDLLIKPVQRI  
MKYQLLLKDILKYTEKAGIEEEAQNLRKAVHIMHVVPKAANDMMNVGRLQGFDGKITGQG  
KLLQQGILFISDPSTGGKMKERQVFLFEQIIIFSDSVGPKTQFSNPVYIYKNHLQVNKMSLEERSE  
ESDPTKFLKSKDPMQQGLTFVIQASQEERDEWVANIRAILDTQLDFLRALQSPIAYQKELTK  
DISAPELGSLWNPSLRKTLSHPAAHKTVKSGSATTGPSLTSKSLRHPGRDKKVRADVTKPKS  
VSAGTSGENLKEQTDGLVKECRAHSLAVPPLTLGDQSSDSESCNKNNGNSTPDVTS DGQRK  
HSLPIEKRSNLAQQSPKSKRNFFEGFRNTLRPKSKTDSVLSGSGESTAVLSSSHLSDSASAAQG  
KQDLSLNNKSDSMIRRWSETNPSRSVKGRRDMRWPHLTPRLSPALCSATEDYSASQSDEIPLS  
KGD TVHLISKH SR CFVKKYSEDDDDNGTTEGWVPSYVIGQDVRKNRSFRLRLGLSMERLGH  
KWTSGGD KKTETPKLND SKNLQTPNDLPDSVVSND EKKSLIFIESVSNMEVPEGEDATLAGRV  
APADCLVVKWTL PDN SEIESK SIESDELSDSQFSPSTSPDSPMFDIKVQAFVFS DGGFSLTIRNCA  
NSYSGQYVCTVNSPFGKIQTTC HLTVLGKPTPPGRPYVVERCGDSVCLQWSPPLCTGNLQLI



### Amino acid sequences of contig c34105\_g1\_i1 translated from *Pamphobeteus verdolaga*.

CSQLSCSFPGISSLPNFYHEVGEQHQHVGNPIVFRGKDSVSFSALSQVPPATSFSSSTTTVGHMNS  
HTQEWSSSHQGKAGGVLRRSSKSVSDLHSLPQLEDSSSFPTSVRSHTPPPNIANQVLDNEKGLKK  
DSSRENDASASLPDPYFELEESERQFVDSVTDMGFPRGQVARTVKHLGTDDKKVVEHLCQIQTL  
EESGYDSLEAEAAHLHDYNSDEARKYLDLLIKIQLGFDKTARS

### Amino acid sequences of contig c5964\_g1\_i2 translated from *Pamphobeteus verdolaga*.

XHLVPFSPLSDRDRGLRHPFGKAQYCRGVSLQPRAGKSKIAQRAPAAGESVTAIVHSQYNSPA  
AMYSMNAIADTLSAHAEMIAPGVMGINFMKPEKPINTMSEVYKLVQEEEQMKGDRTSPAA  
PSQKKPYFGSLKVAQATSPTPPSSTPPVRQVRVSAPPVKTPPPVAPKPVLPVLPVAPPAPAA  
PTSPGVTPPQANCSDCGRFIAGIFVRLNDRTLHEECFRCSTCGTSLKNMGYVNISNKLYCDIHA  
KLAAKIIPPEDVSPTPPVNNAPAAPAPAFTPAPAFTPAPPPAPAPAQVPPPLPMPAAVAPK  
VTQTAPSPFSPQLQQLTGGDLGNLPHTPSSSGGLPFRSISPQPFRAAGDYHKVIAPMSPTTGS  
TAAPYFPQSGPLPFEMTPYMPPEVPVSSVFSSSSQQTQVSQTSQQTQITQQTQTSQTSQFSVDYRK  
VIAQQSGRTGTFKIWPFPKPGAPVLESNTMPPTYPNTQHYSPLAMQSTPSSLSQTLFSR  
SVQPPVPAPPAPSAAPPAPAPPAPAPLPFVPPPLSSFTKPAEPEPPKQEPKSEPQATEAAPEQ  
KETSKEPPPPQPLPLPTSAPSGPSAPGFAPVLAPVVDPSSEPKPSAPQSGVPTGAGSRPAPKRG  
RGQLKEQTPGSRIPICAVCGSPIRGPFVLTALGKTWCPDHFHCNNVHCKAPLQDIGFVEEHGQL  
YCENCYEAFLAPICNKCTVRIKGDCLNALDKQWHPECFICAYCSKPFGNTSFYLEDGLPYCEK  
DWNELFTTKCVGCGYPIEAGDRWVEALNNNYHSQCFCSCICNKNLEGQSFYAKGGRPFCKA  
HAR

### Amino acid sequences of contig c14908\_g1\_i2 translated from *Pamphobeteus verdolaga*.

MSYGSSYGSGRYGSGYGSSSYGSGSRRTGGSSYTPSTISSSYVPYRRSNGGSSYGLMQSKSASYIS  
PTSSPRSSISSASGTTYLSSRIPSSNSYRNSTSYDPSYGSSKGVYKTLDSKKSDYVPDTEERCKLT  
ASRSTGSVDQDDVSDSSKEEEDDEEEEDDDISERAKQKYGSSTSLPDTSSSEVSSRGETPSRYSS  
VSSSRSSLIEDSNKDYKKLYEETKKENERLREKLKXSEDELERVKQQLQKSTQNNNTRNSISET  
KKERRALERRISEMEMEEVKTLTKLKAENEKLAENRALSRRVCKLSK

### Amino acid sequences of contig c4688\_g1\_i1 translated from *Pamphobeteus verdolaga*.

XLRELNECVGEEQSFKPVSSSEVDAIRSQQDEFKHYHQDRLEPLGKQIDGMNKMGGGLIQSAAP  
GVSTSVLECDLDVLNDRWNSLKQRMNERERRLDVAFLQSGKFQEAMAGVQKWLEDTEEMV  
ANQKPPSADYKVVKAQLQEQLKFLNKLDRQSSMSSMTMGTEIMNNMEPMERIQLEAQLS  
DLMQRFDELMNGAQERTDALERTIPVAKDFQDRMSPLVEWLEQTEKKLAGMATIPTDQEKIR  
QRMVEHEALHEDIMDHKEAFEELTEIAQMLMGLVGDDEAQVVVEKLQEVTDFHAKVVEDSE  
HIGQLLAAYQGMGSFTVNYEDLMAWIDEMASRLSRFHVLSVYVEKLQEQLDELVELSEEIAD  
HQQQVDDVASAGQDIMKHASGDDVIRMKEKLDLSVKFTDLTSRAADRLRQAQDSLPLVQN  
FHSSHEKVTAWMDSAERQLKSLNVGLTSQETSIQKLEAEIQEYRPMVDTLNHLGPQLCQMSF  
GEGAAVIETQVSRVNRFDACEQVQRKAERIDLSKQRNVEVIGDIEDLLDWFHEVEKQMMQ  
AEPLSADPDSL TALLKEQKILNEEVSSQKGRVRDILVAAKKLMRESSGDDLAEVRDKADELKD  
VTNAVASLCAADRLAALPLAEHFFETHADLCQWLDEIESEAELEAPALNANQIKKQQE  
RNKALMQSVNDHKALVDKLNKTGEALKKLTPEEASRVQDVMDSDNSRYSSLKDILDRQN  
ALEEALQATSQFSKLDGMLNALSNTADQLNNAEPVSAHPEKIEEQIDENKAVLKDLDKRSN  
ALEAVKRAADDVIVKAGGARDPAVKDIKQLDKLNDLWDNIQKLARNRGRSLEDALAAAE  
RFWDELTTVMKALKDLQDSLAAQEPPAIEPNAIQQQQEVLEI

**Amino acid sequences of contig c14491\_g1\_i2 translated from *Pamphobeteus verdolaga*.**

MEFPALGKHCFEKSNCMLDFLPMKCDACGNVFCKDHIHYIKHSCERAYQKDIQVPVCPLCN  
KPVPSKRSEPPDIAVGEHIDRDCQSDPAVAKRKIYTNRCVKSCKRKEVIPLSCDNCRKNFCLK  
HRHSADHECRDIKTSHELSPSGAAALVRMQASNKCTSKTSSKQSFSNAVMTANLPGSVIETE  
KSVRSASACMSEDEALALALQKSLSDCNKAPPLPKDVQEEEDRLLAQAALAAEIDQRTAVSGV  
QRHNXGQELYSVLA AVL SMLLN

**Amino acid sequences of contig c9864\_g1\_i1 translated from *Pamphobeteus verdolaga*.**

MSYRNQYSGSPWQQGGPPFGVGGYGQSYGGYGLNDQYAMMNSGYRSRQGGYGSMYSSG  
MSQMRSMGYGGPSPSRHYLNDRMGGRQSGRGQMQRKRLPQRSPAGGPRSKRPNLDESRRN  
RSKPRRRRDSRGSGSKGRRDHSDDEKGDPEYNPAEPTDDASDINYDDYESWKSSSDDENETKEV  
TQNGEEQPAIDGEETKTTEKTDES DAKAKVD AKKPLICHVCKITCSNPERFRKHTISRTHRSKM  
DTLLALQREKKQVLEASMKASQQVESRDSSKKS RKP GNWCTVCECSFSGNFLAHRRTKEHR  
KKRDKKYPKCRPCR VGFSSSEYKEHCKKEDHKLKSAEFHYLKNLASGSDDDEAAIEPIAEYIE  
AEDETKKDAEMKEEKEGSEEKKEEQEKMD EAKDGEETTDEKKDKKDDGKDSKSSKQKDS  
KESKEPKAIGQSFVVS VQGYCKLCHKFFKDVTVAKVKHCRSIMHNGAFKKAMEEAMEQEEE  
RQKLADQQEKIEREIAEAARLAADIAAVEKAAKEAAKREAAEKKAAQAKDSETKESVDQN  
ENAAVEKMETDVANGEKEEMEVTETKESGEETKGKTEPQPPAPVAAAEEEEKPAETAQSDS  
QGDEEVEEEPEKAKEEPTSSPATRRGRGRGRGQSRGKGKRR

**Amino acid sequences of contig c62910\_g1\_i1 translated from *Pamphobeteus verdolaga*.**

MFRMQNNTTVVDLLHPDLLSTTVLQEILVERKIGEEHINGASREQLLSLYSKVILPLPQREFRKNR  
RGAYLSKKCGRNALQEKSTESQVEVKAKSTSPVPCPETQSRLPATKNKIVGLHATEPQSRLKPP  
PISTESGKIIKLSRATNGDSIISPKRSMSPPGDSKRPKLIRLNRTLPPQNNKSKDDHCEETDTPSP  
PKKKHKPILWP

**Amino acid sequences of contig c29740\_g1\_i1 translated from *Pamphobeteus verdolaga*.**

MIQTAMPGVDVWRISPEVKAKYDEQFFQLKPINGYVTGDQAKNLFQSGLPQILAQIWALA  
DRNADGKMDSFEFAIAMHLIQMKLKGAE LPKILPSSMQVAAPQSVAIAPGFRPPVAVGPPVP  
AVPTSTMAPL TAGFIRPASP VDAKLQRSGSVSSQDSPTGVPPPLIEWAVPQQSKLKYTQLFNSY  
DRTRTGFLTGAQARNILVQTGLSHVILAQIWSLADIDADGRLSCEEFLAMHLTDCVKAGDTL  
PPALPPDLIPPSHRRKRSTSIQSNVSISSHSNIGDMLLLGDLKEEDKLKGLPATFEDKRRENFEG  
QAE LERRRLALLESQRKEQEERERKEREEQERRERIRQEERRRQLELEKQLAKQRELEQEE  
QRRKALEQREAA REMERQRQLEWEKQRQ QE LLSQRQKEQETVCHLKNVNKNLTFELEELA  
GKIKDLNEKISETRKGVTAMKSSIDDMRNERDSKLKEIADVKSKEFNDRLLV

**Amino acid sequences of contig c11572\_g1\_i1 translated from *Pamphobeteus verdolaga*.**

MVLVSAEGSERRPPMDAPENPVLLPKQSTWTKGDEH MVYLDNARAKREQSKQPTSMY GQLV  
TQDQLVAISTR TQGSQNDLVALQSPTPYKCRDPSSAPLRKLSVDLIKTYKHINEVYYAKKKRA  
QQTQGGDTSHKKERKIFNDGYDDDNHDYIIRNGEKFLDRYEIDSLIGKGSFGQVVKAYDHED  
QCHVAIKIIKNKKPFLNQAQIEVKLLEMMNNHDSGSCYPVGQDKIVKLKGFHFMWRNHLCL  
VFELLSYNLYDLLRNTNFRGVSLNLTRKFAQQMCTALMFLSSDLNIIHCDLKPENILL CNPKR

SAIKIVDFGSSCQLGQRIYQYIQSRFYRSPEVLLGIPYDMAIDMWSLGCILVEMHTGEPLFSGAN  
 EVDQMNKIVEVLGMPPKHILDQAHKSRKYFDRLPDGTFVLKKTGDGKKYKSPGTRKLHDILG  
 VETGGPGGRRLGEPGHTVSDYLFKDLILRMLDYDPKTRISPYHALQHSFFKRTSDESTNTSHS  
 ASTSPAMEQGSVGNTNTGAGGAGSGSSSGSSSCAPPQVAGRARSDPTHQHHPFGQLQHSYTQ  
 TGSYSMQFGTQVSITTAATAAALSAMECESPITSAGAGIFRSSQKIHAWSALGAAGTPTTLTPA  
 IGAFTGTVTVGQHSHTSAPTSTRVGSHSHHSHNHSYRRHLHHQTQSSASGQTSASTSHAMNAV  
 SFDPLQSFQPPATFSVVSSSRNQACSSSSVASSQLMPMDINSSNNLFASLDCTQTGSLNIQLGSSY  
 QPLLYTGTVYSGQTTVPSYLGNTNFSQLGIHPSTPTTQPSSVVSPDVVSQKQSTDRDESPMVGVC  
 VEQSPVASH

**Amino acid sequences of contig c5016\_g1\_i1 translated from *Pamphobeteus verdolaga*.**

KEYYEDDESIPKNTSVIVARVPVWSCNKKSWERSDLPLPVDDDELSGQINFDKVVKSADLVN  
 ANVSEEDKVKAMISQSSQEYDPSKYLKCRSMTGPLPPSYTCFRCGKQGHWIKNCPTNNVDIKR  
 STGIPRSFMVPVDGPEHKGALLTSSGEYAVPLIDHVAAYKEVKREKPPFVNVPEPEVEPEAQIPEE  
 LLCMVCRDLLQDAVLIPCCGNSFCDECVRQVLLDSDNHECPLCHETGISPDVIPNRFLRTAVL  
 NFRNETGYTRVKRMPSIPFPQPSHMDSPQSPDSTVENQAAPPEPVPEEAATVEDGTAVPITTV  
 PEPENVEPECNETTESTPQPPDPPVQEETEETVEPGNEDLQPGTPLADEPPVHNVPEPELAENE  
 QYPSHNQYDEENKFSYSHYYNENMDSDSRDEGHVSSSEINQISTIETITTRLNYKSRSDRPSHS  
 FSQQRPVHHGHTRDPDSSSLPSRRGGSSHTYRSKPQEWPKGSLTVLVERDYNHDRLDYRDRYD  
 RRNRDRPTNTSRFPQRSHNRYERPRETRYNQSDYHSENRCEYRDYSNNSELREDVNYEIRTNS  
 GESTHSHAQRYNSPPASEHTQNKINVAAPPPPPPX

**Amino acid sequences of contig c17992\_g1\_i1 translated from *Pamphobeteus verdolaga*.**

MAYLXIVISDNGPQYASAEFHNFFVQQYDFQHITSSPGYPQANREVERMVRAVKDLLKRYPLP  
 LILPQYAWSDWCLTSTVLYGSQASNEXCLLIIVNSSLGQIFDSTRRKITTLKSSNKSIGITAVTQP  
 DLFQFSTPEITLPRFGYIRDCPQFLYYSPIQSHYRQGHSEKELPPPGETTPAICWDITPCSLLE  
 PKPMPATASQVLPTHASEADNTMSDKPLEPASPAARTEIXVTDENQQRDHEASKVPQSESEG  
 DVVVLTQ

**Section S3.** Raw material of proteomic reports.

Header -----

Search title Sebastian-AS-pep-5600 (\\nucleus.ecn.purdue.edu\vhedrick\My Documents\Mascot Daemon\Sebastian\_AS-peptides\_5600.par), submitted from Daemon on 1212-B119PC12

Timestamp 2015-08-20T14:01:03Z

User

Email

Report URI

[http://mascot.bbc.purdue.edu/mascot/cgi/master\\_results.pl?file=../data/20150820/F020650.dat](http://mascot.bbc.purdue.edu/mascot/cgi/master_results.pl?file=../data/20150820/F020650.dat)

Peak list data path C:\ProgramData\Matrix Science\Mascot Daemon\MGF\833 Sebastian-AS-pep-5600\mascot\_daemon\_merge.mgf

Peak list format Mascot generic

Search type MIS

Mascot version 2.5.1

Database AS\_peptides\_081915

Fasta file AS\_peptides\_081915\_20150819.fasta

Total sequences 1834

Total residues 175871

Sequences after taxonomy filter 1834

Number of queries 271399

Decoy -----

Number of matches above identity threshold in search of real database 78

Number of matches above identity threshold in search of decoy database 25

Number of matches above homology threshold in search of real database 78

Number of matches above homology threshold in search of decoy database 25

Fixed modifications-----

Identifier Name Delta Neutral loss

1      Ethanolyl (C)      44,026215

Variable modifications -----

Identifier      Name Delta      Neutral loss(es)

1      Acetyl (K)      42,010565

2      Oxidation (M)      15,994915      0      63,998285

Search Parameters -----

Taxonomy filter      All entries

Enzyme      Trypsin

Maximum Missed Cleavages      1

Fixed modifications Ethanolyl (C)

Variable modifications      Acetyl (K),Oxidation (M)

Peptide Mass Tolerance      0,05

Peptide Mass Tolerance Units      Da

Fragment Mass Tolerance 0,2

Fragment Mass Tolerance Units      Da

Mass values      Monoisotopic

Instrument type      ESI-QUAD-TOF

Decoy database also searched      1

Format parameters -----

Significance threshold      0,05

Max. number of hits      0

Use MudPIT protein scoring      1

Ions score cut-off      0

Include same-set proteins      0

Include sub-set proteins      1

Include unassigned      0

Require bold red      0

Use homology threshold      1

Group protein families      1

Re-score using Percolator 0

Show duplicate peptides 1

Protein hits -----

| prot_hit_num | prot_family_member | prot_acc | prot_score | prot_mass | prot_matches | prot_matches_sig | prot_sequences | prot_sequences_sig | prot_cover | pep_query | pep_rank | pep_isbold | pep_isunique | pep_exp_mz | pep_exp_mr | pep_exp_z | pep_calc_mr | pep_delta | pep_miss | pep_score | pep_expect | pep_res_before | pep_seq | pep_res_after | pep_var_mod | pep_var_mod_pos | pep_summed_mod_pos | pep_local_mod_pos |
|--------------|--------------------|----------|------------|-----------|--------------|------------------|----------------|--------------------|------------|-----------|----------|------------|--------------|------------|------------|-----------|-------------|-----------|----------|-----------|------------|----------------|---------|---------------|-------------|-----------------|--------------------|-------------------|
|--------------|--------------------|----------|------------|-----------|--------------|------------------|----------------|--------------------|------------|-----------|----------|------------|--------------|------------|------------|-----------|-------------|-----------|----------|-----------|------------|----------------|---------|---------------|-------------|-----------------|--------------------|-------------------|

4 1 >Hyaluronidase-1-Loxosceles intermedia|sp:R4J7Z9|1899  
 Hyaluronidase from the venom of the spider Loxosceles intermedia 22  
 46697 18 4 4 1 12,8 87360 1 1 1  
 536,2918 2141,138 4 2141,1595 -0,0214 1 2,09  
 0,62 K YGMK FVPLLEQYSILV NK E

6 1 >U16-lycotoxin-Ls1a|sp:B6DD52|1075 Toxin from venom of the  
 spider Lycosa singoriensis with unknown molecular target and function 15  
 2174 1 2 1 18005 1 1 1 421,7672  
 841,5198 2 841,5385 -0,0187 1 1,37 0,73 K  
 GIIRTIK D Acetyl (K) 0.0000001.0

6 1 >U16-lycotoxin-Ls1a|sp:B6DD52|1075 Toxin from venom of the  
 spider Lycosa singoriensis with unknown molecular target and function 15  
 2174 1 2 1 63948 1 1 1 498,2414  
 994,4682 2 994,5124 -0,0441 1 2,99 0,5 R  
 TIKDWYK G Acetyl (K) 0.0010000.0

7 1 >SphingomyelinaseD(LISicTox-alphaIII1i)|sp:Q8I914|132  
 Sphingomyelinase D (EC 3.1.4.41; LISicTox-alphaIII1i) from the spider  
 Loxosceles laeta 14 34985 45 3 2 1 5,1 3983 1  
 1 1 406,695 811,3755 2 811,3348 0,0407 0  
 5,38 0,29 K ESGYNDK Y

7 1 >SphingomyelinaseD(LISicTox-alphaIII1i)|sp:Q8I914|132  
 Sphingomyelinase D (EC 3.1.4.41; LISicTox-alphaIII1i) from the spider  
 Loxosceles laeta 14 34985 45 3 2 1 5,1 67559 1  
 1 1 504,2342 1006,4539 2 1006,472 -0,018 0  
 0,06 1,7 R DSANGFINK I Acetyl (K)  
 0.000000001.0



8 1 >CRISP-2-Grammostola rosea|sp:M5WW7 |1844 Translation of a  
cysteine rich secretory protein (CRISP) from the spider Grammostola rosea

13 46078 40 1 5 1 11,5 61364 1 1 1  
493,2478 984,481 2 984,524 -0,043 1 0,01 3,3  
R TGPQVKGEK S Acetyl (K) 0.000001000.0

8 1 >CRISP-2-Grammostola rosea|sp:M5WW7 |1844 Translation of a  
cysteine rich secretory protein (CRISP) from the spider Grammostola rosea

13 46078 40 1 5 1 11,5 85926 2 0 1  
533,2644 1064,5143 2 1064,5178 -0,0035 1 1,14  
0,77 K DWYKEIK D 2 Acetyl (K) 0.0001001.0

8 1 >CRISP-2-Grammostola rosea|sp:M5WW7 |1844 Translation of a  
cysteine rich secretory protein (CRISP) from the spider Grammostola rosea

13 46078 40 1 5 1 11,5 152184 1 1  
1 728,3399 1454,6653 2 1454,7075 -0,0423 1  
9,26 0,12 K VATGKETQYSMPK A Oxidation (M)  
0.0000000000200.0

8 1 >CRISP-2-Grammostola rosea|sp:M5WW7 |1844 Translation of a  
cysteine rich secretory protein (CRISP) from the spider Grammostola rosea

13 46078 40 1 5 1 11,5 67400 1 1 1  
503,7584 2011,0045 4 2010,9973 0,0072 1 0,4 2,8  
K SFPTVLTSSSMSFTKFTK K Oxidation (M)  
0.000000000020000000.0

## Section S4. Gen Ontology terms using the Panther database of the different proteins with catalytic activity.

### Oxidoreductase Activity

|                                   |       |                                                                                              |                                                                                         |                                                                                                 |                     |
|-----------------------------------|-------|----------------------------------------------------------------------------------------------|-----------------------------------------------------------------------------------------|-------------------------------------------------------------------------------------------------|---------------------|
| HUMAN HGNC=3482 UniProtKB=P38117  | ETFB  | Electron transfer flavoprotein subunit beta;ETFB;ortholog                                    | ELECTRON TRANSFER FLAVOPROTEIN SUBUNIT BETA (PTHR21294:SF8)                             | hydroxylase(PC00122)                                                                            | <i>Homo sapiens</i> |
| HUMAN HGNC=7695 UniProtKB=O75438  | NDUB1 | NADH dehydrogenase [ubiquinone] 1 beta subcomplex subunit 1;NDUB1;ortholog                   | NADH DEHYDROGENASE [UBIQUINONE] 1 BETA SUBCOMPLEX SUBUNIT 1 (PTHR15222:SF4)             | dehydrogenase(PC00092);mitochondrial carrier protein(PC00158);transfer/carrier protein(PC00219) | <i>Homo sapiens</i> |
| HUMAN HGNC=15987 UniProtKB=O76003 | GLRX3 | Glutaredoxin-3;GLRX3;ortholog                                                                | GLUTAREDOXIN-3 (PTHR10293:SF40)                                                         | reductase(PC00198)                                                                              | <i>Homo sapiens</i> |
| HUMAN HGNC=11180 UniProtKB=P04179 | SODM  | Superoxide dismutase [Mn], mitochondrial;SOD2;ortholog                                       | SUPEROXIDE DISMUTASE [MN], MITOCHONDRIAL (PTHR11404:SF35)                               | oxidoreductase(PC00176)                                                                         | <i>Homo sapiens</i> |
| HUMAN HGNC=6052 UniProtKB=P20839  | IMDH1 | Inosine-5'-monophosphate dehydrogenase 1;IMPDH1;ortholog                                     | INOSINE-5'-MONOPHOSPHATE DEHYDROGENASE 1 (PTHR11911:SF74)                               | dehydrogenase(PC00092);metalloprotease(PC00153);reductase(PC00198)                              | <i>Homo sapiens</i> |
| HUMAN HGNC=10683 UniProtKB=O14521 | DHSD  | Succinate dehydrogenase [ubiquinone] cytochrome b small subunit, mitochondrial;SDHD;ortholog | SUCCINATE DEHYDROGENASE [UBIQUINONE] CYTOCHROME B SMALL SUBUNIT-RELATED (PTHR13337:SF6) | transfer/carrier protein(PC00219)                                                               | <i>Homo sapiens</i> |
| HUMAN HGNC=30231 UniProtKB=O75663 | TIPRL | TIP41-like protein;TIPRL;ortholog                                                            | TIP41-LIKE PROTEIN (PTHR21021:SF16)                                                     |                                                                                                 | <i>Homo sapiens</i> |
| HUMAN HGNC=1334 UniProtKB=Q96IV6  | FXDC2 | Fatty acid hydroxylase domain-containing protein 2;FAXDC2;ortholog                           | FATTY ACID HYDROXYLASE DOMAIN-CONTAINING PROTEIN 2 (PTHR11863:SF26)                     | hydroxylase(PC00122);oxidase(PC00175)                                                           | <i>Homo sapiens</i> |

|                                   |       |                                                                                       |                                                                                     |                         |                     |
|-----------------------------------|-------|---------------------------------------------------------------------------------------|-------------------------------------------------------------------------------------|-------------------------|---------------------|
| HUMAN HGNC=29836 UniProtKB=Q9NRX3 | NUA4L | NADH dehydrogenase [ubiquinone] 1 alpha subcomplex subunit 4-like 2;NDUFA4L2;ortholog | NADH DEHYDROGENASE [UBIQUINONE] 1 ALPHA SUBCOMPLEX SUBUNIT 4-LIKE 2 (PTHR14256:SF5) | oxidoreductase(PC00176) | <i>Homo sapiens</i> |
| HUMAN HGNC=23287 UniProtKB=O95571 | ETHE1 | Persulfide dioxygenase ETHE1, mitochondrial;ETHE1;ortholog                            | PERSULFIDE DIOXYGENASE ETHE1, MITOCHONDRIAL (PTHR43084:SF4)                         | hydrolase(PC00121)      | <i>Homo sapiens</i> |
| HUMAN HGNC=2638 UniProtKB=P20815  | CP3A5 | Cytochrome P450 3A5;CYP3A5;ortholog                                                   | CYTOCHROME P450 3A5 (PTHR24302:SF20)                                                | oxygenase(PC00177)      | <i>Homo sapiens</i> |
| HUMAN HGNC=12009 UniProtKB=P60174 | TPIS  | Triosephosphate isomerase;TPI1;ortholog                                               | TRIOSEPHOSPHATE ISOMERASE (PTHR21139:SF22)                                          | isomerase(PC00135)      | <i>Homo sapiens</i> |
| HUMAN HGNC=2861 UniProtKB=P00374  | DYR   | Dihydrofolate reductase;DHFR;ortholog                                                 | DIHYDROFOLATE REDUCTASE (PTHR22778:SF46)                                            | reductase(PC00198)      | <i>Homo sapiens</i> |
| HUMAN HGNC=7699 UniProtKB=O95168  | NDUB4 | NADH dehydrogenase [ubiquinone] 1 beta subcomplex subunit 4;NDUFB4;ortholog           | NADH DEHYDROGENASE [UBIQUINONE] 1 BETA SUBCOMPLEX SUBUNIT 4 (PTHR15469:SF1)         | reductase(PC00198)      | <i>Homo sapiens</i> |
| HUMAN HGNC=2570 UniProtKB=P00167  | CYB5  | Cytochrome b5;CYB5A;ortholog                                                          | CYTOCHROME B5 (PTHR19359:SF78)                                                      | oxidase(PC00175)        | <i>Homo sapiens</i> |
| HUMAN HGNC=12587 UniProtKB=P47985 | UCRI  | Cytochrome b-c1 complex subunit Rieske, mitochondrial;UQCRFS1;ortholog                | CYTOCHROME B-C1 COMPLEX SUBUNIT RIESKE, MITOCHONDRIAL-RELATED (PTHR10134:SF1)       |                         | <i>Homo sapiens</i> |
| HUMAN HGNC=382 UniProtKB=O60218   | AK1BA | Aldo-keto reductase family 1 member B10;AKR1B10;ortholog                              | ALDO-KETO REDUCTASE FAMILY 1 MEMBER B10 (PTHR11732:SF278)                           | reductase(PC00198)      | <i>Homo sapiens</i> |
| HUMAN HGNC=4866 UniProtKB=Q9BQS7  | HEPH  | Hephaestin;HEPH;ortholog                                                              | HEPHAESTIN (PTHR11709:SF221)                                                        | oxidase(PC00175)        | <i>Homo sapiens</i> |

|                                   |        |                                                                                |                                                                               |                                                                             |                     |
|-----------------------------------|--------|--------------------------------------------------------------------------------|-------------------------------------------------------------------------------|-----------------------------------------------------------------------------|---------------------|
| HUMAN HGNC=2898 UniProtKB=P09622  | DLDH   | Dihydrolipoyl dehydrogenase, mitochondrial;DLD;ortholog                        | DIHYDROLIPOYL DEHYDROGENASE, MITOCHONDRIAL (PTHR22912:SF151)                  | dehydrogenase(PC00092);oxidase(PC00175);reductase(PC00198)                  | <i>Homo sapiens</i> |
| HUMAN HGNC=30862 UniProtKB=O14957 | QCR10  | Cytochrome b-c1 complex subunit 10;UQCR11;ortholog                             | CYTOCHROME B-C1 COMPLEX SUBUNIT 10 (PTHR15420:SF2)                            |                                                                             | <i>Homo sapiens</i> |
| HUMAN HGNC=17194 UniProtKB=Q9P0J0 | NDUAD  | NADH dehydrogenase [ubiquinone] 1 alpha subcomplex subunit 13;NDUFA13;ortholog | NADH DEHYDROGENASE [UBIQUINONE] 1 ALPHA SUBCOMPLEX SUBUNIT 13 (PTHR12966:SF0) | dehydrogenase(PC00092)                                                      | <i>Homo sapiens</i> |
| HUMAN HGNC=17366 UniProtKB=Q9UDR5 | SDHAAS | Alpha-aminoadipic semialdehyde synthase, mitochondrial;AAS;ortholog            | ALPHA-AMINOADIPIC SEMIALDEHYDE SYNTHASE, MITOCHONDRIAL (PTHR11133:SF18)       |                                                                             | <i>Homo sapiens</i> |
| HUMAN HGNC=7422 UniProtKB=P00414  | COX3   | Cytochrome c oxidase subunit 3;MT-CO3;ortholog                                 | CYTOCHROME C OXIDASE SUBUNIT 3 (PTHR11403:SF7)                                | oxidase(PC00175)                                                            | <i>Homo sapiens</i> |
| HUMAN HGNC=11476 UniProtKB=O15260 | SURF4  | Surfeit locus protein 4;SURF4;ortholog                                         | SURFEIT LOCUS PROTEIN 4 (PTHR23427:SF1)                                       | oxidase(PC00175);transmembrane receptor regulatory/adaptor protein(PC00226) | <i>Homo sapiens</i> |
| HUMAN HGNC=4313 UniProtKB=P23378  | GCDP   | Glycine dehydrogenase (decarboxylating), mitochondrial;GLDC;ortholog           | GLYCINE DEHYDROGENASE (DECARBOXYLATING), MITOCHONDRIAL (PTHR11773:SF1)        | dehydrogenase(PC00092)                                                      | <i>Homo sapiens</i> |
| HUMAN HGNC=29079 UniProtKB=O60341 | KDM1A  | Lysine-specific histone demethylase 1A;KDM1A;ortholog                          | LYSINE-SPECIFIC HISTONE DEMETHYLASE 1A (PTHR10742:SF350)                      | DNA methyltransferase(PC00013);oxidase(PC00175)                             | <i>Homo sapiens</i> |
| HUMAN HGNC=5385 UniProtKB=O43837  | IDH3B  | Isocitrate dehydrogenase [NAD] subunit beta, mitochondrial;IDH3B;ortholog      | ISOCITRATE DEHYDROGENASE [NAD] SUBUNIT BETA, MITOCHONDRIAL (PTHR11835:SF42)   | dehydrogenase(PC00092)                                                      | <i>Homo sapiens</i> |

|                                   |        |                                                                                |                                                                              |                                                                       |                     |
|-----------------------------------|--------|--------------------------------------------------------------------------------|------------------------------------------------------------------------------|-----------------------------------------------------------------------|---------------------|
| HUMAN HGNC=4455 UniProtKB=P21695  | GPD A  | Glycerol-3-phosphate dehydrogenase [NAD(+)], cytoplasmic;GPD1;ortholog         | GLYCEROL-3-PHOSPHATE DEHYDROGENASE [NAD(+)], CYTOPLASMIC (PTHR11728:SF32)    | dehydrogenase(PC00092)                                                | <i>Homo sapiens</i> |
| HUMAN HGNC=4801 UniProtKB=P40939  | ECH A  | Trifunctional enzyme subunit alpha, mitochondrial;HADHA;ortholog               | TRIFUNCTIONAL ENZYME SUBUNIT ALPHA, MITOCHONDRIAL (PTHR43612:SF5)            | dehydrogenase(PC00092);epimerase/racemase(PC00096);hydratase(PC00120) | <i>Homo sapiens</i> |
| HUMAN HGNC=2640 UniProtKB=P24462  | CP3 A7 | Cytochrome P450 3A7;CYP3A7;ortholog                                            | CYP3A7-CYP3A51P READTHROUGH-RELATED (PTHR24302:SF31)                         | oxygenase(PC00177)                                                    | <i>Homo sapiens</i> |
| HUMAN HGNC=17450 UniProtKB=Q9HB55 | CP34 3 | Cytochrome P450 3A43;CYP3A43;ortholog                                          | CYTOCHROME P450 3A43 (PTHR24302:SF6)                                         | oxygenase(PC00177)                                                    | <i>Homo sapiens</i> |
| HUMAN HGNC=2269 UniProtKB=P10606  | COX 5B | Cytochrome c oxidase subunit 5B, mitochondrial;COX5B;ortholog                  | CYTOCHROME C OXIDASE SUBUNIT 5B, MITOCHONDRIAL (PTHR10122:SF0)               | oxidase(PC00175)                                                      | <i>Homo sapiens</i> |
| HUMAN HGNC=19691 UniProtKB=Q9BV79 | MEC R  | Enoyl-[acyl-carrier-protein] reductase, mitochondrial;MECR;ortholog            | ENOYL-[ACYL-CARRIER-PROTEIN] REDUCTASE, MITOCHONDRIAL (PTHR43981:SF2)        |                                                                       | <i>Homo sapiens</i> |
| HUMAN HGNC=29958 UniProtKB=Q8NEX9 | DR9 C7 | Short-chain dehydrogenase/reductase family 9C member 7;SDR9C7;ortholog         | SHORT-CHAIN DEHYDROGENASE/REDUCTASE FAMILY 9C MEMBER 7 (PTHR43313:SF5)       | dehydrogenase(PC00092);reductase(PC00198)                             | <i>Homo sapiens</i> |
| HUMAN HGNC=410 UniProtKB=P43353   | AL3 B1 | Aldehyde dehydrogenase family 3 member B1;ALDH3B1;ortholog                     | ALDEHYDE DEHYDROGENASE FAMILY 3 MEMBER B1 (PTHR43570:SF2)                    |                                                                       | <i>Homo sapiens</i> |
| HUMAN HGNC=976 UniProtKB=P54687   | BCA T1 | Branched-chain-amino-acid aminotransferase, cytosolic;BCAT1;ortholog           | BRANCHED-CHAIN-AMINO-ACID AMINOTRANSFERASE, CYTOSOLIC (PTHR11825:SF70)       | transaminase(PC00216)                                                 | <i>Homo sapiens</i> |
| HUMAN HGNC=21492 UniProtKB=Q8N0U8 | VKO RL | Vitamin K epoxide reductase complex subunit 1-like protein 1;VKORC1L1;ortholog | VITAMIN K EPOXIDE REDUCTASE COMPLEX SUBUNIT 1-LIKE PROTEIN 1 (PTHR14519:SF5) | oxidoreductase(PC00176)                                               | <i>Homo sapiens</i> |

|                                   |        |                                                                              |                                                                              |                                           |                     |
|-----------------------------------|--------|------------------------------------------------------------------------------|------------------------------------------------------------------------------|-------------------------------------------|---------------------|
| HUMAN HGNC=7690 UniProtKB=P56556  | NDU A6 | NADH dehydrogenase [ubiquinone] 1 alpha subcomplex subunit 6;NDUFA6;ortholog | NADH DEHYDROGENASE [UBIQUINONE] 1 ALPHA SUBCOMPLEX SUBUNIT 6 (PTHR12964:SF2) | dehydrogenase(PC00092)                    | <i>Homo sapiens</i> |
| HUMAN HGNC=18503 UniProtKB=Q9BYV7 | BCD O2 | Beta,beta-carotene 9',10'-oxygenase;BCO2;ortholog                            | BETA,BETA-CAROTENE 9',10'-OXYGENASE (PTHR10543:SF61)                         | oxygenase(PC00177)                        | <i>Homo sapiens</i> |
| HUMAN HGNC=9353 UniProtKB=P32119  | PRD X2 | Peroxioredoxin-2;PRDX2;ortholog                                              | PEROXIREDOXIN-2 (PTHR10681:SF151)                                            | peroxidase(PC00180)                       | <i>Homo sapiens</i> |
| HUMAN HGNC=5384 UniProtKB=P50213  | IDH3 A | Isocitrate dehydrogenase [NAD] subunit alpha, mitochondrial;IDH3A;ortholog   | ISOCITRATE DEHYDROGENASE [NAD] SUBUNIT ALPHA, MITOCHONDRIAL (PTHR11835:SF34) | dehydrogenase(PC00092)                    | <i>Homo sapiens</i> |
| HUMAN HGNC=9752 UniProtKB=P09417  | DHP R  | Dihydropteridine reductase;QDPR;ortholog                                     | DIHYDROPTERIDINE REDUCTASE (PTHR15104:SF0)                                   | dehydrogenase(PC00092);reductase(PC00198) | <i>Homo sapiens</i> |
| HUMAN HGNC=2277 UniProtKB=P12074  | CX6 A1 | Cytochrome c oxidase subunit 6A1, mitochondrial;COX6A1;ortholog              | CYTOCHROME C OXIDASE SUBUNIT 6A1, MITOCHONDRIAL (PTHR11504:SF4)              | oxidase(PC00175)                          | <i>Homo sapiens</i> |
| HUMAN HGNC=380 UniProtKB=P14550   | ALR    | Alcohol dehydrogenase [NADP(+)];AKR1A1;ortholog                              | ALCOHOL DEHYDROGENASE [NADP(+)] (PTHR11732:SF401)                            | reductase(PC00198)                        | <i>Homo sapiens</i> |
| HUMAN HGNC=30086 UniProtKB=Q6P1R4 | DUS 1L | tRNA-dihydrouridine(16/17) synthase [NAD(P)(+)]-like;DUS1L;ortholog          | TRNA-DIHYDROURIDINE(16/17) SYNTHASE [NAD(P)(+)]-LIKE (PTHR11082:SF5)         |                                           | <i>Homo sapiens</i> |
| HUMAN HGNC=4795 UniProtKB=O95479  | 6PG L  | GDH/6PGL endoplasmic bifunctional protein;H6PD;ortholog                      | GDH/6PGL ENDOPLASMIC BIFUNCTIONAL PROTEIN (PTHR23429:SF7)                    | dehydrogenase(PC00092)                    | <i>Homo sapiens</i> |
| HUMAN HGNC=10451 UniProtKB=P23921 | RIR1   | Ribonucleoside-diphosphate reductase large subunit;RRM1;ortholog             | RIBONUCLEOSIDE-DIPHOSPHATE REDUCTASE LARGE SUBUNIT (PTHR11573:SF6)           | reductase(PC00198)                        | <i>Homo sapiens</i> |

|                                       |        |                                                                                                   |                                                                                                    |                                           |                     |
|---------------------------------------|--------|---------------------------------------------------------------------------------------------------|----------------------------------------------------------------------------------------------------|-------------------------------------------|---------------------|
| HUMAN HGNC=25996 UniProtKB=Q6P6C2     | ALK B5 | RNA demethylase<br>ALKBH5;ALKBH5;ortholog                                                         | RNA DEMETHYLASE ALKBH5<br>(PTHR32074:SF2)                                                          |                                           | <i>Homo sapiens</i> |
| HUMAN HGNC=15472 UniProtKB=O94788     | AL1 A2 | Retinal dehydrogenase<br>2;ALDH1A2;ortholog                                                       | RETINAL DEHYDROGENASE 2<br>(PTHR11699:SF102)                                                       | dehydrogenase(PC00092)                    | <i>Homo sapiens</i> |
| HUMAN HGNC=4555 UniProtKB=P22352      | GPX 3  | Glutathione peroxidase<br>3;GPX3;ortholog                                                         | GLUTATHIONE PEROXIDASE 3<br>(PTHR11592:SF32)                                                       | peroxidase(PC00180)                       | <i>Homo sapiens</i> |
| HUMAN HGNC=4923 UniProtKB=P52789      | HXK 2  | Hexokinase-2;HK2;ortholog                                                                         | HEXOKINASE-2 (PTHR19443:SF4)                                                                       |                                           | <i>Homo sapiens</i> |
| HUMAN HGNC=15814 UniProtKB=Q9NR19     | ACS A  | Acetyl-coenzyme A synthetase,<br>cytoplasmic;ACSS2;ortholog                                       | ACETYL-COENZYME A SYNTHETASE,<br>CYTOPLASMIC (PTHR24095:SF126)                                     | dehydrogenase(PC00092);ligase(PC00142)    | <i>Homo sapiens</i> |
| HUMAN HGNC=964 UniProtKB=O75936       | BOD G  | Gamma-butyrobetaine<br>dioxygenase;BBOX1;ortholog                                                 | GAMMA-BUTYROBETAINE DIOXYGENASE<br>(PTHR10696:SF33)                                                | hydroxylase(PC00122);oxygenase(PC00177)   | <i>Homo sapiens</i> |
| HUMAN HGNC=7693 UniProtKB=Q16795      | NDU A9 | NADH dehydrogenase [ubiquinone] 1<br>alpha subcomplex subunit 9,<br>mitochondrial;NDUFA9;ortholog | NADH DEHYDROGENASE [UBIQUINONE] 1<br>ALPHA SUBCOMPLEX SUBUNIT 9,<br>MITOCHONDRIAL (PTHR12126:SF10) | dehydrogenase(PC00092);reductase(PC00198) | <i>Homo sapiens</i> |
| HUMAN HGNC=16631 UniProtKB=RT36P82909 |        | 28S ribosomal protein S36,<br>mitochondrial;MRPS36;ortholog                                       | 28S RIBOSOMAL PROTEIN S36,<br>MITOCHONDRIAL (PTHR31601:SF3)                                        |                                           | <i>Homo sapiens</i> |
| HUMAN HGNC=6666 UniProtKB=Q9Y4K0      | LOX L2 | Lysyl oxidase homolog<br>2;LOXL2;ortholog                                                         | LYSYL OXIDASE HOMOLOG 2<br>(PTHR45817:SF1)                                                         |                                           | <i>Homo sapiens</i> |
| HUMAN HGNC=1063 UniProtKB=P30043      | BLV RB | Flavin reductase<br>(NADPH);BLVRB;ortholog                                                        | FLAVIN REDUCTASE (NADPH)<br>(PTHR43355:SF2)                                                        | reductase(PC00198)                        | <i>Homo sapiens</i> |



|                                   |       |                                                                                 |                                                                                   |                                                                       |                     |
|-----------------------------------|-------|---------------------------------------------------------------------------------|-----------------------------------------------------------------------------------|-----------------------------------------------------------------------|---------------------|
| HUMAN HGNC=25598 UniProtKB=Q9NV66 | TYW1  | S-adenosyl-L-methionine-dependent tRNA 4-demethylwyosine synthase;TYW1;ortholog | S-ADENOSYL-L-METHIONINE-DEPENDENT TRNA 4-DEMETHYLWYOSINE SYNTHASE (PTHR13930:SF0) | oxidoreductase(PC00176);trans porter(PC00227)                         | <i>Homo sapiens</i> |
| HUMAN HGNC=24288 UniProtKB=Q8NE62 | CHDH  | Choline dehydrogenase, mitochondrial;CHDH;ortholog                              | CHOLINE DEHYDROGENASE, MITOCHONDRIAL (PTHR11552:SF147)                            | dehydrogenase(PC00092)                                                | <i>Homo sapiens</i> |
| HUMAN HGNC=7459 UniProtKB=P03905  | NU4M  | NADH-ubiquinone oxidoreductase chain 4;MT-ND4;ortholog                          | NADH-UBIQUINONE OXIDOREDUCTASE CHAIN 4 (PTHR43507:SF1)                            | dehydrogenase(PC00092);reductase(PC00198)                             | <i>Homo sapiens</i> |
| HUMAN HGNC=19331 UniProtKB=Q96EY8 | MMAB  | Cob(I)yrinic acid a,c-diamide adenosyltransferase, mitochondrial;MMAB;ortholog  | COB(I)YRINIC ACID A,C-DIAMIDE ADENOSYLTRANSFERASE, MITOCHONDRIAL (PTHR12213:SF0)  | dehydrogenase(PC00092)                                                | <i>Homo sapiens</i> |
| HUMAN HGNC=12582 UniProtKB=P14927 | QCR7  | Cytochrome b-c1 complex subunit 7;UQCRB;ortholog                                | CYTOCHROME B-C1 COMPLEX SUBUNIT 7 (PTHR12022:SF2)                                 | reductase(PC00198)                                                    | <i>Homo sapiens</i> |
| HUMAN HGNC=6971 UniProtKB=P40926  | MDHM  | Malate dehydrogenase, mitochondrial;MDH2;ortholog                               | MALATE DEHYDROGENASE, MITOCHONDRIAL (PTHR11540:SF16)                              | dehydrogenase(PC00092)                                                | <i>Homo sapiens</i> |
| HUMAN HGNC=4335 UniProtKB=P00367  | DHE3  | Glutamate dehydrogenase 1, mitochondrial;GLUD1;ortholog                         | GLUTAMATE DEHYDROGENASE 1, MITOCHONDRIAL (PTHR11606:SF25)                         | dehydrogenase(PC00092)                                                | <i>Homo sapiens</i> |
| HUMAN HGNC=19086 UniProtKB=Q96DB2 | HDA11 | Histone deacetylase 11;HDAC11;ortholog                                          | HISTONE DEACETYLASE 11 (PTHR43497:SF2)                                            | deacetylase(PC00087);nucleic acid binding(PC00171);reductase(PC00198) | <i>Homo sapiens</i> |
| HUMAN HGNC=10603 UniProtKB=O75880 | SCO1  | Protein SCO1 homolog, mitochondrial;SCO1;ortholog                               | PROTEIN SCO1 HOMOLOG, MITOCHONDRIAL (PTHR12151:SF4)                               | oxidase(PC00175)                                                      | <i>Homo sapiens</i> |

|                                   |       |                                                                          |                                                                          |                                                                     |                     |
|-----------------------------------|-------|--------------------------------------------------------------------------|--------------------------------------------------------------------------|---------------------------------------------------------------------|---------------------|
| HUMAN HGNC=21298 UniProtKB=Q86V21 | AACS  | Acetoacetyl-CoA synthetase;AACS;ortholog                                 | ACETOACETYL-COA SYNTHETASE (PTHR42921:SF1)                               | dehydrogenase(PC00092);ligase(PC00142)                              | <i>Homo sapiens</i> |
| HUMAN HGNC=20837 UniProtKB=Q6QHF9 | PAOX  | Peroxisomal N(1)-acetyl-spermine/spermidine oxidase;PAOX;ortholog        | PEROXISOMAL N(1)-ACETYL-SPERMINE/SPERMIDINE OXIDASE (PTHR10742:SF43)     | DNA methyltransferase(PC00013);oxidase(PC00175)                     | <i>Homo sapiens</i> |
| HUMAN HGNC=2571 UniProtKB=P49447  | CY561 | Cytochrome b561;CYB561;ortholog                                          | CYTOCHROME B561 (PTHR10106:SF14)                                         | reductase(PC00198)                                                  | <i>Homo sapiens</i> |
| HUMAN HGNC=18685 UniProtKB=Q7Z5P4 | DHB13 | 17-beta-hydroxysteroid dehydrogenase 13;HSD17B13;ortholog                | 17-BETA-HYDROXYSTEROID DEHYDROGENASE 13 (PTHR24322:SF499)                |                                                                     | <i>Homo sapiens</i> |
| HUMAN HGNC=14966 UniProtKB=Q92626 | PXD N | Peroxidasin homolog;PXD N;ortholog                                       | PEROXIDASIN HOMOLOG (PTHR11475:SF75)                                     | peroxidase(PC00180)                                                 | <i>Homo sapiens</i> |
| HUMAN HGNC=6053 UniProtKB=P12268  | IMDH2 | Inosine-5'-monophosphate dehydrogenase 2;IMPDH2;ortholog                 | INOSINE-5'-MONOPHOSPHATE DEHYDROGENASE 2 (PTHR11911:SF121)               | dehydrogenase(PC00092);metallopeptidase(PC00153);reductase(PC00198) | <i>Homo sapiens</i> |
| HUMAN HGNC=17169 UniProtKB=Q13162 | PRDX4 | Peroxiredoxin-4;PRDX4;ortholog                                           | PEROXIREDOXIN-4 (PTHR10681:SF128)                                        | peroxidase(PC00180)                                                 | <i>Homo sapiens</i> |
| HUMAN HGNC=13280 UniProtKB=Q96HE7 | ERO1L | ERO1-like protein alpha;ERO1A;ortholog                                   | ERO1-LIKE PROTEIN ALPHA (PTHR12613:SF1)                                  | oxidoreductase(PC00176)                                             | <i>Homo sapiens</i> |
| HUMAN HGNC=15862 UniProtKB=Q9NWM0 | SMOX  | Spermine oxidase;SMOX;ortholog                                           | SPERMINE OXIDASE (PTHR10742:SF347)                                       | DNA methyltransferase(PC00013);oxidase(PC00175)                     | <i>Homo sapiens</i> |
| HUMAN HGNC=30141 UniProtKB=Q96Q83 | ALKB3 | Alpha-ketoglutarate-dependent dioxygenase alkB homolog 3;ALKBH3;ortholog | ALPHA-KETOGLUTARATE-DEPENDENT DIOXYGENASE ALKB HOMOLOG 3 (PTHR31212:SF4) |                                                                     | <i>Homo sapiens</i> |

|                                   |           |                                                                           |                                                                             |                                                                    |                     |
|-----------------------------------|-----------|---------------------------------------------------------------------------|-----------------------------------------------------------------------------|--------------------------------------------------------------------|---------------------|
| HUMAN HGNC=11474 UniProtKB=Q15526 | SURF1     | Surfeit locus protein 1;SURF1;ortholog                                    | SURFEIT LOCUS PROTEIN 1 (PTHR23427:SF2)                                     | oxidase(PC00175)                                                   | <i>Homo sapiens</i> |
| HUMAN HGNC=4458 UniProtKB=P06744  | G6PI      | Glucose-6-phosphate isomerase;GPI;ortholog                                | GLUCOSE-6-PHOSPHATE ISOMERASE (PTHR11469:SF4)                               | isomerase(PC00135)                                                 | <i>Homo sapiens</i> |
| HUMAN HGNC=8891 UniProtKB=P52209  | 6PGD,PGDH | 6-phosphogluconate dehydrogenase, decarboxylating;PGD;ortholog            | 6-PHOSPHOGLUCONATE DEHYDROGENASE, DECARBOXYLATING (PTHR11811:SF53)          | dehydrogenase(PC00092)                                             | <i>Homo sapiens</i> |
| HUMAN HGNC=6041 UniProtKB=A1L0T0  | ILVBL     | Acetolactate synthase-like protein;ILVBL;ortholog                         | ACETOLACTATE SYNTHASE-LIKE PROTEIN (PTHR18968:SF155)                        | decarboxylase(PC00089);dehydrogenase(PC00092);transferase(PC00220) | <i>Homo sapiens</i> |
| HUMAN HGNC=3481 UniProtKB=P13804  | ETFA      | Electron transfer flavoprotein subunit alpha, mitochondrial;ETFA;ortholog | ELECTRON TRANSFER FLAVOPROTEIN SUBUNIT ALPHA, MITOCHONDRIAL (PTHR43153:SF1) | dehydrogenase(PC00092);oxidase(PC00175);transferase(PC00220)       | <i>Homo sapiens</i> |
| HUMAN HGNC=4623 UniProtKB=P00390  | GSHR      | Glutathione reductase, mitochondrial;GSR;ortholog                         | GLUTATHIONE REDUCTASE, MITOCHONDRIAL (PTHR42737:SF2)                        | dehydrogenase(PC00092);oxidase(PC00175);reductase(PC00198)         | <i>Homo sapiens</i> |
| HUMAN HGNC=2494 UniProtKB=Q13363  | CTBP      | C-terminal-binding protein 1;CTBP1;ortholog                               | C-TERMINAL-BINDING PROTEIN 1 (PTHR46029:SF2)                                | transcription cofactor(PC00217)                                    | <i>Homo sapiens</i> |
| HUMAN HGNC=2596 UniProtKB=P05177  | CP1A2     | Cytochrome P450 1A2;CYP1A2;ortholog                                       | CYTOCHROME P450 1A2 (PTHR24299:SF7)                                         | oxygenase(PC00177)                                                 | <i>Homo sapiens</i> |
| HUMAN HGNC=3773 UniProtKB=P49326  | FMO5      | Dimethylaniline monooxygenase [N-oxide-forming] 5;FMO5;ortholog           | DIMETHYLANILINE MONOOXYGENASE [N-OXIDE-FORMING] 5 (PTHR23023:SF78)          | oxygenase(PC00177)                                                 | <i>Homo sapiens</i> |
| HUMAN HGNC=7432 UniProtKB=P11586  | C1TC      | C-1-tetrahydrofolate synthase, cytoplasmic;MTHFD1;ortholog                | C-1-TETRAHYDROFOLATE SYNTHASE, CYTOPLASMIC (PTHR43274:SF2)                  | ligase(PC00142)                                                    | <i>Homo sapiens</i> |

|                                          |                                                                            |                                                                              |                                                                        |                     |
|------------------------------------------|----------------------------------------------------------------------------|------------------------------------------------------------------------------|------------------------------------------------------------------------|---------------------|
| HUMAN HGNC=23198 UniProtKB=CP4 V2 Q6ZWL3 | Cytochrome P450 4V2;CYP4V2;ortholog                                        | CYTOCHROME P450 4V2 (PTHR24291:SF56)                                         | oxygenase(PC00177)                                                     | <i>Homo sapiens</i> |
| HUMAN HGNC=5386 UniProtKB=IDH3 G P51553  | Isocitrate dehydrogenase [NAD] subunit gamma, mitochondrial;IDH3G;ortholog | ISOCITRATE DEHYDROGENASE [NAD] SUBUNIT GAMMA, MITOCHONDRIAL (PTHR11835:SF60) | dehydrogenase(PC00092)                                                 | <i>Homo sapiens</i> |
| HUMAN HGNC=32487 UniProtKB=ALK B2 Q6NS38 | DNA oxidative demethylase ALKBH2;ALKBH2;ortholog                           | DNA OXIDATIVE DEMETHYLASE ALKBH2 (PTHR31573:SF1)                             |                                                                        | <i>Homo sapiens</i> |
| HUMAN HGNC=7473 UniProtKB=MTR R Q9UBK8   | Methionine synthase reductase;MTRR;ortholog                                | METHIONINE SYNTHASE REDUCTASE (PTHR19384:SF84)                               |                                                                        | <i>Homo sapiens</i> |
| HUMAN HGNC=18985 UniProtKB=DCX R Q7Z4W1  | L-xylulose reductase;DCXR;ortholog                                         | L-XYLULOSE REDUCTASE (PTHR44252:SF2)                                         |                                                                        | <i>Homo sapiens</i> |
| HUMAN HGNC=4892 UniProtKB=HGD Q93099     | Homogentisate 1,2-dioxygenase;HGD;ortholog                                 | HOMOGENTISATE 1,2-DIOXYGENASE (PTHR11056:SF0)                                | oxygenase(PC00177)                                                     | <i>Homo sapiens</i> |
| HUMAN HGNC=11179 UniProtKB=SOD C P00441  | Superoxide dismutase [Cu-Zn];SOD1;ortholog                                 | SUPEROXIDE DISMUTASE [CU-ZN] (PTHR10003:SF58)                                | oxidoreductase(PC00176)                                                | <i>Homo sapiens</i> |
| HUMAN HGNC=6983 UniProtKB=MA OX P48163   | NADP-dependent malic enzyme;ME1;ortholog                                   | NADP-DEPENDENT MALIC ENZYME (PTHR23406:SF17)                                 | acyltransferase(PC00042);decarboxylase(PC00089);dehydrogenase(PC00092) | <i>Homo sapiens</i> |
| HUMAN HGNC=10293 UniProtKB=RPE Q96AT9    | Ribulose-phosphate 3-epimerase;RPE;ortholog                                | RIBULOSE-PHOSPHATE 3-EPIMERASE-RELATED (PTHR11749:SF9)                       |                                                                        | <i>Homo sapiens</i> |
| HUMAN HGNC=28242 UniProtKB=HPD L Q96IR7  | 4-hydroxyphenylpyruvate dioxygenase-like protein;HPDL;ortholog             | 4-HYDROXYPHENYLPYRUVATE DIOXYGENASE-LIKE PROTEIN (PTHR11959:SF10)            | oxygenase(PC00177)                                                     | <i>Homo sapiens</i> |

|                                   |        |                                                                             |                                                                             |                                                              |                     |
|-----------------------------------|--------|-----------------------------------------------------------------------------|-----------------------------------------------------------------------------|--------------------------------------------------------------|---------------------|
| HUMAN HGNC=26222 UniProtKB=Q8WVX9 | FAC R1 | Fatty acyl-CoA reductase 1;FAR1;ortholog                                    | FATTY ACYL-COA REDUCTASE 1 (PTHR11011:SF45)                                 |                                                              | <i>Homo sapiens</i> |
| HUMAN HGNC=7891 UniProtKB=Q9NPH5  | NOX 4  | NADPH oxidase 4;NOX4;ortholog                                               | NADPH OXIDASE 4 (PTHR11972:SF78)                                            | oxidase(PC00175)                                             | <i>Homo sapiens</i> |
| HUMAN HGNC=28697 UniProtKB=Q8N4Q0 | PTG R3 | Prostaglandin reductase 3;ZADH2;ortholog                                    | PROSTAGLANDIN REDUCTASE 3 (PTHR43677:SF3)                                   | dehydrogenase(PC00092);reductase(PC00198)                    | <i>Homo sapiens</i> |
| HUMAN HGNC=987 UniProtKB=P21953   | ODB B  | 2-oxoisovalerate dehydrogenase subunit beta, mitochondrial;BCKDHB;ortholog  | 2-OXOISOVALERATE DEHYDROGENASE SUBUNIT BETA, MITOCHONDRIAL (PTHR42980:SF1)  | dehydrogenase(PC00092);lyase(PC00144);transketolase(PC00221) | <i>Homo sapiens</i> |
| HUMAN HGNC=4829 UniProtKB=P02042  | HBD    | Hemoglobin subunit delta;HBD;ortholog                                       | HEMOGLOBIN SUBUNIT DELTA (PTHR11442:SF50)                                   |                                                              | <i>Homo sapiens</i> |
| HUMAN HGNC=4803 UniProtKB=P55084  | ECH B  | Trifunctional enzyme subunit beta, mitochondrial;HADHB;ortholog             | TRIFUNCTIONAL ENZYME SUBUNIT BETA, MITOCHONDRIAL (PTHR18919:SF141)          | acetyltransferase(PC00038)                                   | <i>Homo sapiens</i> |
| HUMAN HGNC=2577 UniProtKB=P13498  | CY24 A | Cytochrome b-245 light chain;CYBA;ortholog                                  | CYTOCHROME B-245 LIGHT CHAIN (PTHR15168:SF0)                                |                                                              | <i>Homo sapiens</i> |
| HUMAN HGNC=3951 UniProtKB=Q16595  | FRD A  | Frataxin, mitochondrial;FXN;ortholog                                        | FRATAXIN, MITOCHONDRIAL (PTHR16821:SF4)                                     | cation transporter(PC00068);kinase(PC00137)                  | <i>Homo sapiens</i> |
| HUMAN HGNC=7702 UniProtKB=P17568  | NDU B7 | NADH dehydrogenase [ubiquinone] 1 beta subcomplex subunit 7;NDUFB7;ortholog | NADH DEHYDROGENASE [UBIQUINONE] 1 BETA SUBCOMPLEX SUBUNIT 7 (PTHR20900:SF0) | dehydrogenase(PC00092)                                       | <i>Homo sapiens</i> |
| HUMAN HGNC=404 UniProtKB=P05091   | ALD H2 | Aldehyde dehydrogenase, mitochondrial;ALDH2;ortholog                        | ALDEHYDE DEHYDROGENASE, MITOCHONDRIAL (PTHR11699:SF233)                     | dehydrogenase(PC00092)                                       | <i>Homo sapiens</i> |

|                                   |       |                                                                                      |                                                                                       |                                         |                     |
|-----------------------------------|-------|--------------------------------------------------------------------------------------|---------------------------------------------------------------------------------------|-----------------------------------------|---------------------|
| HUMAN HGNC=4057 UniProtKB=P11413  | G6PD  | Glucose-6-phosphate 1-dehydrogenase;G6PD;ortholog                                    | GLUCOSE-6-PHOSPHATE 1-DEHYDROGENASE (PTHR23429:SF0)                                   | dehydrogenase(PC00092)                  | <i>Homo sapiens</i> |
| HUMAN HGNC=7715 UniProtKB=O00217  | NDUS8 | NADH dehydrogenase [ubiquinone] iron-sulfur protein 8, mitochondrial;NDUFS8;ortholog | NADH DEHYDROGENASE [UBIQUINONE] IRON-SULFUR PROTEIN 8, MITOCHONDRIAL (PTHR10849:SF24) | Homo sapiens                            |                     |
| HUMAN HGNC=9083 UniProtKB=O60568  | PLOD3 | Procollagen-lysine,2-oxoglutarate 5-dioxygenase 3;PLOD3;ortholog                     | PROCOLLAGEN-LYSINE,2-OXOGLUTARATE 5-DIOXYGENASE 3 (PTHR10730:SF7)                     | oxygenase(PC00177)                      | <i>Homo sapiens</i> |
| HUMAN HGNC=29838 UniProtKB=Q9UHB4 | NDOR1 | NADPH-dependent diflavin oxidoreductase 1;NDOR1;ortholog                             | NADPH-DEPENDENT DIFLAVIN OXIDOREDUCTASE 1 (PTHR19384:SF10)                            |                                         | <i>Homo sapiens</i> |
| HUMAN HGNC=26927 UniProtKB=Q96CU9 | FXRD1 | FAD-dependent oxidoreductase domain-containing protein 1;FOXRED1;ortholog            | FAD-DEPENDENT OXIDOREDUCTASE DOMAIN-CONTAINING PROTEIN 1 (PTHR13847:SF44)             | dehydrogenase(PC00092);oxidase(PC00175) | <i>Homo sapiens</i> |
| HUMAN HGNC=18308 UniProtKB=Q9NVH6 | TMLH  | Trimethyllysine dioxygenase, mitochondrial;TMLHE;ortholog                            | TRIMETHYLLYSINE DIOXYGENASE, MITOCHONDRIAL (PTHR10696:SF3)                            |                                         | <i>Homo sapiens</i> |
| HUMAN HGNC=4570 UniProtKB=Q9UBQ7  | GRHPR | Glyoxylate reductase/hydroxypyruvate reductase;GRHPR;ortholog                        | GLYOXYLATE REDUCTASE/HYDROXYPYRUVATE REDUCTASE (PTHR10996:SF137)                      | dehydrogenase(PC00092)                  | <i>Homo sapiens</i> |
| HUMAN HGNC=24475 UniProtKB=Q9UI17 | DMGDH | Dimethylglycine dehydrogenase, mitochondrial;DMGDH;ortholog                          | DIMETHYLGLYCINE DEHYDROGENASE, MITOCHONDRIAL (PTHR13847:SF187)                        | dehydrogenase(PC00092);oxidase(PC00175) | <i>Homo sapiens</i> |
| HUMAN HGNC=4907 UniProtKB=P31937  | 3HIDH | 3-hydroxyisobutyrate dehydrogenase, mitochondrial;HIBADH;ortholog                    | 3-HYDROXYISOBUTYRATE DEHYDROGENASE, MITOCHONDRIAL (PTHR22981:SF7)                     | dehydrogenase(PC00092)                  | <i>Homo sapiens</i> |
| HUMAN HGNC=7863 UniProtKB=Q13423  | NNTM  | NAD(P) transhydrogenase, mitochondrial;NNT;ortholog                                  | NAD(P) TRANSHYDROGENASE, MITOCHONDRIAL (PTHR10160:SF22)                               | dehydrogenase(PC00092)                  | <i>Homo sapiens</i> |

|                                   |           |                                                                                       |                                                                                      |                                           |                     |
|-----------------------------------|-----------|---------------------------------------------------------------------------------------|--------------------------------------------------------------------------------------|-------------------------------------------|---------------------|
| HUMAN HGNC=408 UniProtKB=P51649   | SSD<br>H  | Succinate-semialdehyde dehydrogenase, mitochondrial;ALDH5A1;ortholog                  | SUCCINATE-SEMIALDEHYDE DEHYDROGENASE, MITOCHONDRIAL (PTHR43353:SF5)                  | dehydrogenase(PC00092)                    | <i>Homo sapiens</i> |
| HUMAN HGNC=253 UniProtKB=P11766   | ADH<br>X  | Alcohol dehydrogenase class-3;ADH5;ortholog                                           | ALCOHOL DEHYDROGENASE CLASS-3 (PTHR43880:SF4)                                        | dehydrogenase(PC00092);reductase(PC00198) | <i>Homo sapiens</i> |
| HUMAN HGNC=7706 UniProtKB=O95298  | NDU<br>C2 | NADH dehydrogenase [ubiquinone] 1 subunit C2;NDUFC2;ortholog                          | NADH DEHYDROGENASE [UBIQUINONE] 1 SUBUNIT C2-RELATED (PTHR13099:SF0)                 | oxidoreductase(PC00176)                   | <i>Homo sapiens</i> |
| HUMAN HGNC=1516 UniProtKB=P04040  | CAT<br>A  | Catalase;CAT;ortholog                                                                 | CATALASE (PTHR11465:SF9)                                                             | peroxidase(PC00180)                       | <i>Homo sapiens</i> |
| HUMAN HGNC=16232 UniProtKB=Q96KJ9 | COX<br>42 | Cytochrome c oxidase subunit 4 isoform 2, mitochondrial;COX4I2;ortholog               | CYTOCHROME C OXIDASE SUBUNIT 4 ISOFORM 2, MITOCHONDRIAL (PTHR10707:SF11)             |                                           | <i>Homo sapiens</i> |
| HUMAN HGNC=7179 UniProtKB=Q02252  | MMS<br>A  | Methylmalonate-semialdehyde dehydrogenase [acylating], mitochondrial;ALDH6A1;ortholog | METHYLMALONATE-SEMIALDEHYDE DEHYDROGENASE [ACYLATING], MITOCHONDRIAL (PTHR43866:SF3) | dehydrogenase(PC00092)                    | <i>Homo sapiens</i> |
| HUMAN HGNC=10452 UniProtKB=P31350 | RIR2      | Ribonucleoside-diphosphate reductase subunit M2;RRM2;ortholog                         | RIBONUCLEOSIDE-DIPHOSPHATE REDUCTASE SUBUNIT M2 (PTHR23409:SF20)                     | reductase(PC00198)                        | <i>Homo sapiens</i> |
| HUMAN HGNC=7873 UniProtKB=P35228  | NOS<br>2  | Nitric oxide synthase, inducible;NOS2;ortholog                                        | NITRIC OXIDE SYNTHASE, INDUCIBLE (PTHR19384:SF56)                                    |                                           | <i>Homo sapiens</i> |
| HUMAN HGNC=8923 UniProtKB=O43175  | SER<br>A  | D-3-phosphoglycerate dehydrogenase;PHGDH;ortholog                                     | D-3-PHOSPHOGLYCERATE DEHYDROGENASE (PTHR42938:SF9)                                   | dehydrogenase(PC00092)                    | <i>Homo sapiens</i> |
| HUMAN HGNC=7455 UniProtKB=P03886  | NU1<br>M  | NADH-ubiquinone oxidoreductase chain 1;MT-ND1;ortholog                                | NADH-UBIQUINONE OXIDOREDUCTASE CHAIN 1 (PTHR11432:SF3)                               | dehydrogenase(PC00092);reductase(PC00198) | <i>Homo sapiens</i> |



|                                          |                                                                              |                                                                              |                                                               |                     |
|------------------------------------------|------------------------------------------------------------------------------|------------------------------------------------------------------------------|---------------------------------------------------------------|---------------------|
| HUMAN HGNC=10297 UniProtKB=RPIA P49247   | Ribose-5-phosphate isomerase;RPIA;ortholog                                   | RIBOSE-5-PHOSPHATE ISOMERASE (PTHR11934:SF0)                                 |                                                               | <i>Homo sapiens</i> |
| HUMAN HGNC=2689 UniProtKB=DOP O P09172   | Dopamine beta-hydroxylase;DBH;ortholog                                       | DOPAMINE BETA-HYDROXYLASE (PTHR10157:SF29)                                   |                                                               | <i>Homo sapiens</i> |
| HUMAN HGNC=5398 UniProtKB=GILT P13284    | Gamma-interferon-inducible lysosomal thiol reductase;IFI30;ortholog          | GAMMA-INTERFERON-INDUCIBLE LYOSOMAL THIOL REDUCTASE (PTHR13234:SF8)          | reductase(PC00198)                                            | <i>Homo sapiens</i> |
| HUMAN HGNC=17822 UniProtKB=PGE S2 Q9H7Z7 | Prostaglandin E synthase 2;PTGES2;ortholog                                   | PROSTAGLANDIN E SYNTHASE 2 (PTHR12782:SF5)                                   | reductase(PC00198)                                            | <i>Homo sapiens</i> |
| HUMAN HGNC=4195 UniProtKB=GCK P35557     | Glucokinase;GCK;ortholog                                                     | GLUCOKINASE (PTHR19443:SF3)                                                  |                                                               | <i>Homo sapiens</i> |
| HUMAN HGNC=9081 UniProtKB=PLO D Q02809   | Procollagen-lysine,2-oxoglutarate 5-dioxygenase 1;PLOD1;ortholog             | PROCOLLAGEN-LYSINE,2-OXOGLUTARATE 5-DIOXYGENASE 1 (PTHR10730:SF5)            | oxygenase(PC00177)                                            | <i>Homo sapiens</i> |
| HUMAN HGNC=11834 UniProtKB=TKT P29401    | Transketolase;TKT;ortholog                                                   | TRANSKETOLASE (PTHR43195:SF3)                                                | dehydrogenase(PC00092);lyase (PC00144);transketolase(PC00221) | <i>Homo sapiens</i> |
| HUMAN HGNC=412 UniProtKB=AL9 A1 P49189   | 4-trimethylaminobutyraldehyde dehydrogenase;ALDH9A1;ortholog                 | 4-TRIMETHYLAMINO BUTYRALDEHYDE DEHYDROGENASE (PTHR11699:SF228)               | dehydrogenase(PC00092)                                        | <i>Homo sapiens</i> |
| HUMAN HGNC=7688 UniProtKB=NDU A5 Q16718  | NADH dehydrogenase [ubiquinone] 1 alpha subcomplex subunit 5;NDUFA5;ortholog | NADH DEHYDROGENASE [UBIQUINONE] 1 ALPHA SUBCOMPLEX SUBUNIT 5 (PTHR12653:SF0) | oxidoreductase(PC00176)                                       | <i>Homo sapiens</i> |
| HUMAN HGNC=23316 UniProtKB=H17B 6 O14756 | 17-beta-hydroxysteroid dehydrogenase type 6;HSD17B6;ortholog                 | 17-BETA-HYDROXYSTEROID DEHYDROGENASE TYPE 6 (PTHR43313:SF4)                  | dehydrogenase(PC00092);reductase(PC00198)                     | <i>Homo sapiens</i> |

|                                   |        |                                                                   |                                                                    |                                                            |                     |
|-----------------------------------|--------|-------------------------------------------------------------------|--------------------------------------------------------------------|------------------------------------------------------------|---------------------|
| HUMAN HGNC=8768 UniProtKB=O95831  | AIF M1 | Apoptosis-inducing factor 1, mitochondrial;AIFM1;ortholog         | APOPTOSIS-INDUCING FACTOR 1, MITOCHONDRIAL (PTHR43557:SF4)         | dehydrogenase(PC00092);oxidase(PC00175);reductase(PC00198) | <i>Homo sapiens</i> |
| HUMAN HGNC=26101 UniProtKB=Q96CM8 | ACS F2 | Acyl-CoA synthetase family member 2, mitochondrial;ACSF2;ortholog | ACYL-COA SYNTHETASE FAMILY MEMBER 2, MITOCHONDRIAL (PTHR43201:SF9) | dehydrogenase(PC00092);ligase(PC00142)                     | <i>Homo sapiens</i> |
| HUMAN HGNC=28218 UniProtKB=Q9BRA2 | TXD 17 | Thioredoxin domain-containing protein 17;TXNDC17;ortholog         | THIOREDOXIN DOMAIN-CONTAINING PROTEIN 17 (PTHR12452:SF0)           | transporter(PC00227)                                       | <i>Homo sapiens</i> |
| HUMAN HGNC=26920 UniProtKB=Q96G46 | DUS 3L | tRNA-dihydrouridine(47) synthase [NAD(P)(+)]-like;DUS3L;ortholog  | TRNA-DIHYDROURIDINE(47) SYNTHASE [NAD(P)(+)]-LIKE (PTHR45846:SF1)  |                                                            | <i>Homo sapiens</i> |
| HUMAN HGNC=20499 UniProtKB=Q9H9P8 | L2H DH | L-2-hydroxyglutarate dehydrogenase, mitochondrial;L2HGDH;ortholog | L-2-HYDROXYGLUTARATE DEHYDROGENASE, MITOCHONDRIAL (PTHR43104:SF2)  | dehydrogenase(PC00092);oxidase(PC00175)                    | <i>Homo sapiens</i> |
| HUMAN HGNC=12590 UniProtKB=P07919 | QCR 6  | Cytochrome b-c1 complex subunit 6, mitochondrial;UQCRH;ortholog   | CYTOCHROME B-C1 COMPLEX SUBUNIT 6, MITOCHONDRIAL (PTHR15336:SF3)   | reductase(PC00198)                                         | <i>Homo sapiens</i> |
| HUMAN HGNC=20667 UniProtKB=Q86VQ6 | TRX R3 | Thioredoxin reductase 3;TXNRD3;ortholog                           | THIOREDOXIN REDUCTASE 3 (PTHR43256:SF7)                            | dehydrogenase(PC00092);oxidase(PC00175);reductase(PC00198) | <i>Homo sapiens</i> |
| HUMAN HGNC=11184 UniProtKB=Q00796 | DHS O  | Sorbitol dehydrogenase;SORD;ortholog                              | SORBITOL DEHYDROGENASE (PTHR43161:SF9)                             | dehydrogenase(PC00092);reductase(PC00198)                  | <i>Homo sapiens</i> |
| HUMAN HGNC=9722 UniProtKB=P54886  | P5CS   | Delta-1-pyrroline-5-carboxylate synthase;ALDH18A1;ortholog        | DELTA-1-PYRROLINE-5-CARBOXYLATE SYNTHASE (PTHR11063:SF8)           | amino acid kinase(PC00045);dehydrogenase(PC00092)          | <i>Homo sapiens</i> |
| HUMAN HGNC=3012 UniProtKB=Q12882  | DPY D  | Dihydropyrimidine dehydrogenase [NADP(+)];DPYD;ortholog           | DIHYDROPYRIMIDINE DEHYDROGENASE [NADP(+)] (PTHR43073:SF2)          | dehydrogenase(PC00092);reductase(PC00198)                  | <i>Homo sapiens</i> |

|                                   |        |                                                                                    |                                                                                        |                                                                          |                     |
|-----------------------------------|--------|------------------------------------------------------------------------------------|----------------------------------------------------------------------------------------|--------------------------------------------------------------------------|---------------------|
| HUMAN HGNC=23396 UniProtKB=Q5SRE7 | PHY D1 | Phytanoyl-CoA dioxygenase domain-containing protein 1;PHYHD1;ortholog              | PHYTANOYL-COA DIOXYGENASE DOMAIN-CONTAINING PROTEIN 1 (PTHR20883:SF15)                 | oxidoreductase(PC00176)                                                  | <i>Homo sapiens</i> |
| HUMAN HGNC=26506 UniProtKB=Q96MI6 | PPM1E  | Protein phosphatase 1M;PPM1M;ortholog                                              | PROTEIN PHOSPHATASE 1M (PTHR13832:SF236)                                               | kinase inhibitor(PC00139);protein phosphatase(PC00195)                   | <i>Homo sapiens</i> |
| HUMAN HGNC=20797 UniProtKB=Q53TN4 | CYBR1  | Cytochrome b reductase 1;CYBRD1;ortholog                                           | CYTOCHROME B REDUCTASE 1 (PTHR10106:SF12)                                              | reductase(PC00198)                                                       | <i>Homo sapiens</i> |
| HUMAN HGNC=30264 UniProtKB=Q8NCN5 | PDP R  | Pyruvate dehydrogenase phosphatase regulatory subunit, mitochondrial;PDPR;ortholog | PYRUVATE DEHYDROGENASE PHOSPHATASE REGULATORY SUBUNIT, MITOCHONDRIAL (PTHR13847:SF193) | dehydrogenase(PC00092);oxidase(PC00175)                                  | <i>Homo sapiens</i> |
| HUMAN HGNC=1613 UniProtKB=O14618  | CCS    | Copper chaperone for superoxide dismutase;CCS;ortholog                             | COPPER CHAPERONE FOR SUPEROXIDE DISMUTASE (PTHR10003:SF27)                             | oxidoreductase(PC00176)                                                  | <i>Homo sapiens</i> |
| HUMAN HGNC=26398 UniProtKB=Q96NN9 | AIF M3 | Apoptosis-inducing factor 3;AIFM3;ortholog                                         | APOPTOSIS-INDUCING FACTOR 3 (PTHR43557:SF8)                                            | dehydrogenase(PC00092);oxidase(PC00175);reductase(PC00198)               | <i>Homo sapiens</i> |
| HUMAN HGNC=4236 UniProtKB=P55789  | ALR    | FAD-linked sulfhydryl oxidase ALR;GFER;ortholog                                    | FAD-LINKED SULFHYDRYL OXIDASE ALR (PTHR12645:SF0)                                      | oxidase(PC00175)                                                         | <i>Homo sapiens</i> |
| HUMAN HGNC=12390 UniProtKB=Q13630 | FCL    | GDP-L-fucose synthase;TSTA3;ortholog                                               | GDP-L-FUCOSE SYNTHASE (PTHR43238:SF1)                                                  | dehydratase(PC00091);epimerase/racemase(PC00096);oxidoreductase(PC00176) | <i>Homo sapiens</i> |
| HUMAN HGNC=7419 UniProtKB=P00395  | COX 1  | Cytochrome c oxidase subunit 1;MT-CO1;ortholog                                     | CYTOCHROME C OXIDASE SUBUNIT 1 (PTHR10422:SF18)                                        | oxidase(PC00175)                                                         | <i>Homo sapiens</i> |
| HUMAN HGNC=1548 UniProtKB=P16152  | CBR 1  | Carbonyl reductase [NADPH] 1;CBR1;ortholog                                         | CARBONYL REDUCTASE [NADPH] 1 (PTHR43963:SF2)                                           |                                                                          | <i>Homo sapiens</i> |

|                                   |        |                                                                                      |                                                                                       |                                                        |                     |
|-----------------------------------|--------|--------------------------------------------------------------------------------------|---------------------------------------------------------------------------------------|--------------------------------------------------------|---------------------|
| HUMAN HGNC=20390 UniProtKB=Q9Y6N5 | SQOR   | Sulfide:quinone oxidoreductase, mitochondrial;SQOR;ortholog                          | SULFIDE:QUINONE OXIDOREDUCTASE, MITOCHONDRIAL (PTHR10632:SF2)                         |                                                        | <i>Homo sapiens</i> |
| HUMAN HGNC=2593 UniProtKB=P05093  | CP17A  | Steroid 17-alpha-hydroxylase/17,20 lyase;CYP17A1;ortholog                            | STEROID 17-ALPHA-HYDROXYLASE/17,20 LYASE (PTHR24289:SF1)                              |                                                        | <i>Homo sapiens</i> |
| HUMAN HGNC=25812 UniProtKB=Q9H8P0 | POR ED | Polyprenol reductase;SRD5A3;ortholog                                                 | POLYPRENOL REDUCTASE (PTHR14624:SF0)                                                  |                                                        | <i>Homo sapiens</i> |
| HUMAN HGNC=7377 UniProtKB=Q9UJ68  | MSRA   | Mitochondrial peptide methionine sulfoxide reductase;MSRA;ortholog                   | MITOCHONDRIAL PEPTIDE METHIONINE SULFOXIDE REDUCTASE (PTHR42799:SF2)                  | reductase(PC00198)                                     | <i>Homo sapiens</i> |
| HUMAN HGNC=7714 UniProtKB=O75251  | NDU S7 | NADH dehydrogenase [ubiquinone] iron-sulfur protein 7, mitochondrial;NDUFS7;ortholog | NADH DEHYDROGENASE [UBIQUINONE] IRON-SULFUR PROTEIN 7, MITOCHONDRIAL (PTHR11995:SF22) | dehydrogenase(PC00092);reductase(PC00198)              | <i>Homo sapiens</i> |
| HUMAN HGNC=2321 UniProtKB=P36551  | HEM 6  | Oxygen-dependent coproporphyrinogen-III oxidase, mitochondrial;CPOX;ortholog         | OXYGEN-DEPENDENT COPROPORPHYRINOGEN-III OXIDASE, MITOCHONDRIAL (PTHR10755:SF0)        | oxidase(PC00175)                                       | <i>Homo sapiens</i> |
| HUMAN HGNC=2267 UniProtKB=P20674  | COX 5A | Cytochrome c oxidase subunit 5A, mitochondrial;COX5A;ortholog                        | CYTOCHROME C OXIDASE SUBUNIT 5A, MITOCHONDRIAL (PTHR14200:SF13)                       | oxidase(PC00175)                                       | <i>Homo sapiens</i> |
| HUMAN HGNC=7872 UniProtKB=P29475  | NOS 1  | Nitric oxide synthase, brain;NOS1;ortholog                                           | NITRIC OXIDE SYNTHASE, BRAIN (PTHR19384:SF63)                                         |                                                        | <i>Homo sapiens</i> |
| HUMAN HGNC=18583 UniProtKB=Q9ULR3 | PPM 1H | Protein phosphatase 1H;PPM1H;ortholog                                                | PROTEIN PHOSPHATASE 1H (PTHR13832:SF287)                                              | kinase inhibitor(PC00139);protein phosphatase(PC00195) | <i>Homo sapiens</i> |
| HUMAN HGNC=17772 UniProtKB=Q99757 | THI OM | Thioredoxin, mitochondrial;TXN2;ortholog                                             | THIOREDOXIN, MITOCHONDRIAL (PTHR43601:SF3)                                            | oxidoreductase(PC00176)                                | <i>Homo sapiens</i> |

|                                   |        |                                                                                              |                                                                                             |                                           |                     |
|-----------------------------------|--------|----------------------------------------------------------------------------------------------|---------------------------------------------------------------------------------------------|-------------------------------------------|---------------------|
| HUMAN HGNC=7421 UniProtKB=P00403  | COX 2  | Cytochrome c oxidase subunit 2;MT-CO2;ortholog                                               | CYTOCHROME C OXIDASE SUBUNIT 2 (PTHR22888:SF9)                                              | oxidoreductase(PC00176)                   | <i>Homo sapiens</i> |
| HUMAN HGNC=20372 UniProtKB=Q9NX14 | NDU BB | NADH dehydrogenase [ubiquinone] 1 beta subcomplex subunit 11, mitochondrial;NDUFB11;ortholog | NADH DEHYDROGENASE [UBIQUINONE] 1 BETA SUBCOMPLEX SUBUNIT 11, MITOCHONDRIAL (PTHR13327:SF0) | oxidoreductase(PC00176)                   | <i>Homo sapiens</i> |
| HUMAN HGNC=30576 UniProtKB=Q9BV57 | MTN D  | 1,2-dihydroxy-3-keto-5-methylthiopentene dioxygenase;ADI1;ortholog                           | 1,2-DIHYDROXY-3-KETO-5-METHYLTHIOPENTENE DIOXYGENASE (PTHR23418:SF0)                        | oxidoreductase(PC00176)                   | <i>Homo sapiens</i> |
| HUMAN HGNC=7700 UniProtKB=O43674  | NDU B5 | NADH dehydrogenase [ubiquinone] 1 beta subcomplex subunit 5, mitochondrial;NDUFB5;ortholog   | NADH DEHYDROGENASE [UBIQUINONE] 1 BETA SUBCOMPLEX SUBUNIT 5, MITOCHONDRIAL (PTHR13178:SF0)  | oxidoreductase(PC00176)                   | <i>Homo sapiens</i> |
| HUMAN HGNC=9021 UniProtKB=P14618  | KPY M  | Pyruvate kinase PKM;PKM;ortholog                                                             | PYRUVATE KINASE PKM (PTHR11817:SF15)                                                        |                                           | <i>Homo sapiens</i> |
| HUMAN HGNC=406 UniProtKB=P30038   | AL4 A1 | Delta-1-pyrroline-5-carboxylate dehydrogenase, mitochondrial;ALDH4A1;ortholog                | DELTA-1-PYRROLINE-5-CARBOXYLATE DEHYDROGENASE, MITOCHONDRIAL (PTHR14516:SF3)                |                                           | <i>Homo sapiens</i> |
| HUMAN HGNC=10536 UniProtKB=Q9UL12 | SAR DH | Sarcosine dehydrogenase, mitochondrial;SARDH;ortholog                                        | SARCOSINE DEHYDROGENASE, MITOCHONDRIAL (PTHR13847:SF200)                                    | dehydrogenase(PC00092);oxidase(PC00175)   | <i>Homo sapiens</i> |
| HUMAN HGNC=30863 UniProtKB=Q9UDW1 | QCR 9  | Cytochrome b-c1 complex subunit 9;UQCR10;ortholog                                            | CYTOCHROME B-C1 COMPLEX SUBUNIT 9 (PTHR12980:SF0)                                           | reductase(PC00198)                        | <i>Homo sapiens</i> |
| HUMAN HGNC=13709 UniProtKB=O15121 | DEG S1 | Sphingolipid delta(4)-desaturase DES1;DEGS1;ortholog                                         | SPHINGOLIPID DELTA(4)-DESATURASE DES1 (PTHR12879:SF2)                                       |                                           | <i>Homo sapiens</i> |
| HUMAN HGNC=28639 UniProtKB=Q6UWP2 | DHR 11 | Dehydrogenase/reductase SDR family member 11;DHRS11;ortholog                                 | DEHYDROGENASE/REDUCTASE SDR FAMILY MEMBER 11 (PTHR43115:SF4)                                | dehydrogenase(PC00092);reductase(PC00198) | <i>Homo sapiens</i> |

|                                   |                 |                                                                         |                                                                           |                                                                       |                     |
|-----------------------------------|-----------------|-------------------------------------------------------------------------|---------------------------------------------------------------------------|-----------------------------------------------------------------------|---------------------|
| HUMAN HGNC=6229 UniProtKB=Q13303  | KCA<br>B2       | Voltage-gated potassium channel subunit beta-2;KCNA2;ortholog           | VOLTAGE-GATED POTASSIUM CHANNEL SUBUNIT BETA-2 (PTHR43150:SF1)            | reductase(PC00198);voltage-gated potassium channel(PC00242)           | <i>Homo sapiens</i> |
| HUMAN HGNC=877 UniProtKB=P49419   | AL7<br>A1       | Alpha-amino adipic semialdehyde dehydrogenase;ALDH7A1;ortholog          | ALPHA-AMINOADIPIC SEMIALDEHYDE DEHYDROGENASE (PTHR43521:SF5)              | dehydrogenase(PC00092)                                                | <i>Homo sapiens</i> |
| HUMAN HGNC=20134 UniProtKB=Q86SX6 | GLR<br>X5       | Glutaredoxin-related protein 5, mitochondrial;GLRX5;ortholog            | GLUTAREDOXIN-RELATED PROTEIN 5, MITOCHONDRIAL (PTHR10293:SF16)            | reductase(PC00198)                                                    | <i>Homo sapiens</i> |
| HUMAN HGNC=20233 UniProtKB=Q9Y2Z9 | COQ<br>6        | Ubiquinone biosynthesis monooxygenase COQ6, mitochondrial;COQ6;ortholog | UBIQUINONE BIOSYNTHESIS MONOOXYGENASE COQ6, MITOCHONDRIAL (PTHR43876:SF7) | oxygenase(PC00177)                                                    | <i>Homo sapiens</i> |
| HUMAN HGNC=29594 UniProtKB=O14949 | QCR<br>8        | Cytochrome b-c1 complex subunit 8;UQCRCQ;ortholog                       | CYTOCHROME B-C1 COMPLEX SUBUNIT 8 (PTHR12119:SF2)                         |                                                                       | <i>Homo sapiens</i> |
| HUMAN HGNC=21577 UniProtKB=Q8NB78 | KDM1B, L<br>SD2 | Lysine-specific histone demethylase 1B;KDM1B;ortholog                   | LYSINE-SPECIFIC HISTONE DEMETHYLASE 1B (PTHR10742:SF359)                  | DNA methyltransferase(PC00013);oxidase(PC00175)                       | <i>Homo sapiens</i> |
| HUMAN HGNC=21063 UniProtKB=Q6UVY6 | MOXD1           | DBH-like monooxygenase protein 1;MOXD1;ortholog                         | DBH-LIKE MONOOXYGENASE PROTEIN 1 (PTHR10157:SF28)                         |                                                                       | <i>Homo sapiens</i> |
| HUMAN HGNC=8903 UniProtKB=O95336  | 6PG<br>L        | 6-phosphogluconolactonase;PGLS;ortholog                                 | 6-PHOSPHOGLUCONOLACTONASE (PTHR11054:SF0)                                 | hydrolase(PC00121)                                                    | <i>Homo sapiens</i> |
| HUMAN HGNC=18246 UniProtKB=Q9Y2S2 | CRYL1           | Lambda-crystallin homolog;CRYL1;ortholog                                | LAMBDA-CRYSTALLIN HOMOLOG (PTHR43492:SF2)                                 | dehydrogenase(PC00092);epimerase/racemase(PC00096);hydratase(PC00120) | <i>Homo sapiens</i> |
| HUMAN HGNC=17804 UniProtKB=Q9P0Z9 | SOX             | Peroxisomal sarcosine oxidase;PIPOX;ortholog                            | PEROXISOMAL SARCOSINE OXIDASE (PTHR10961:SF7)                             | oxidase(PC00175)                                                      | <i>Homo sapiens</i> |

|                                   |           |                                                               |                                                                 |                                                              |                     |
|-----------------------------------|-----------|---------------------------------------------------------------|-----------------------------------------------------------------|--------------------------------------------------------------|---------------------|
| HUMAN HGNC=7064 UniProtKB=O14880  | MGS<br>T3 | Microsomal glutathione S-transferase 3;MGST3;ortholog         | MICROSOMAL GLUTATHIONE S-TRANSFERASE 3 (PTHR10250:SF17)         | transferase(PC00220)                                         | <i>Homo sapiens</i> |
| HUMAN HGNC=16753 UniProtKB=P30041 | PRD<br>X6 | Peroxiredoxin-6;PRDX6;ortholog                                | PEROXIREDOXIN-6 (PTHR43503:SF11)                                | peroxidase(PC00180)                                          | <i>Homo sapiens</i> |
| HUMAN HGNC=2595 UniProtKB=P04798  | CP1<br>A1 | Cytochrome P450 1A1;CYP1A1;ortholog                           | CYTOCHROME P450 1A1 (PTHR24299:SF8)                             | oxygenase(PC00177)                                           | <i>Homo sapiens</i> |
| HUMAN HGNC=19708 UniProtKB=Q86WU2 | LDH<br>D  | Probable D-lactate dehydrogenase, mitochondrial;LDHD;ortholog | D-LACTATE DEHYDROGENASE, MITOCHONDRIAL-RELATED (PTHR11748:SF35) | dehydrogenase(PC00092)                                       | <i>Homo sapiens</i> |
| HUMAN HGNC=9605 UniProtKB=P35354  | COX<br>2  | Prostaglandin G/H synthase 2;PTGS2;ortholog                   | PROSTAGLANDIN G/H SYNTHASE 2 (PTHR11903:SF8)                    | oxygenase(PC00177)                                           | <i>Homo sapiens</i> |
| HUMAN HGNC=6381 UniProtKB=O15229  | KMO<br>O  | Kynurenine 3-monooxygenase;KMO;ortholog                       | KYNURENINE 3-MONOOXYGENASE (PTHR46028:SF2)                      |                                                              | <i>Homo sapiens</i> |
| HUMAN HGNC=121 UniProtKB=O15254   | ACO<br>X3 | Peroxisomal acyl-coenzyme A oxidase 3;ACOX3;ortholog          | PEROXISOMAL ACYL-COENZYME A OXIDASE 3 (PTHR10909:SF315)         | dehydrogenase(PC00092);oxidase(PC00175);transferase(PC00220) | <i>Homo sapiens</i> |
| HUMAN HGNC=13815 UniProtKB=Q9HAY6 | BCD<br>O1 | Beta,beta-carotene 15,15'-dioxygenase;BCO1;ortholog           | BETA,BETA-CAROTENE 15,15'-DIOXYGENASE (PTHR10543:SF34)          | oxygenase(PC00177)                                           | <i>Homo sapiens</i> |
| HUMAN HGNC=8896 UniProtKB=P00558  | PGK<br>1  | Phosphoglycerate kinase 1;PGK1;ortholog                       | PHOSPHOGLYCERATE KINASE 1 (PTHR11406:SF14)                      | carbohydrate kinase(PC00065)                                 | <i>Homo sapiens</i> |
| HUMAN HGNC=14355 UniProtKB=Q86YB8 | ERO<br>1B | ERO1-like protein beta;ERO1B;ortholog                         | ERO1-LIKE PROTEIN BETA (PTHR12613:SF2)                          | oxidoreductase(PC00176)                                      | <i>Homo sapiens</i> |



|                                   |           |                                                                      |                                                                       |                                                              |                     |
|-----------------------------------|-----------|----------------------------------------------------------------------|-----------------------------------------------------------------------|--------------------------------------------------------------|---------------------|
| HUMAN HGNC=4551 UniProtKB=Q9NZ01  | TEC<br>R  | Very-long-chain enoyl-CoA reductase;TECR;ortholog                    | VERY-LONG-CHAIN ENOYL-COA REDUCTASE (PTHR10556:SF31)                  | dehydrogenase(PC00092)                                       | <i>Homo sapiens</i> |
| HUMAN HGNC=3976 UniProtKB=P02794  | FRIH      | Ferritin heavy chain;FTH1;ortholog                                   | FERRITIN HEAVY CHAIN (PTHR11431:SF37)                                 | storage protein(PC00210)                                     | <i>Homo sapiens</i> |
| HUMAN HGNC=20968 UniProtKB=Q9H6W3 | RIO<br>X1 | Ribosomal oxygenase 1;RIOX1;ortholog                                 | RIBOSOMAL OXYGENASE 1 (PTHR13096:SF4)                                 |                                                              | <i>Homo sapiens</i> |
| HUMAN HGNC=1027 UniProtKB=Q02338  | BDH       | D-beta-hydroxybutyrate dehydrogenase, mitochondrial;BDH1;ortholog    | D-BETA-HYDROXYBUTYRATE DEHYDROGENASE, MITOCHONDRIAL (PTHR43313:SF25)  | dehydrogenase(PC00092);reductase(PC00198)                    | <i>Homo sapiens</i> |
| HUMAN HGNC=5211 UniProtKB=P37059  | DHB<br>2  | Estradiol 17-beta-dehydrogenase 2;HSD17B2;ortholog                   | ESTRADIOL 17-BETA-DEHYDROGENASE 2 (PTHR43313:SF3)                     | dehydrogenase(PC00092);reductase(PC00198)                    | <i>Homo sapiens</i> |
| HUMAN HGNC=16354 UniProtKB=Q8IWW8 | HOT       | Hydroxyacid-oxoacid transhydrogenase, mitochondrial;ADHFE1;ortholog  | HYDROXYACID-OXOACID TRANSHYDROGENASE, MITOCHONDRIAL (PTHR11496:SF83)  |                                                              | <i>Homo sapiens</i> |
| HUMAN HGNC=21497 UniProtKB=Q9H845 | ACA<br>D9 | Acyl-CoA dehydrogenase family member 9, mitochondrial;ACAD9;ortholog | ACYL-COA DEHYDROGENASE FAMILY MEMBER 9, MITOCHONDRIAL (PTHR43884:SF9) | dehydrogenase(PC00092);oxidase(PC00175);transferase(PC00220) | <i>Homo sapiens</i> |
| HUMAN HGNC=3062 UniProtKB=Q9NRD9  | DUOX<br>X | Dual oxidase 1;DUOX1;ortholog                                        | DUAL OXIDASE 1 (PTHR11972:SF75)                                       | oxidase(PC00175)                                             | <i>Homo sapiens</i> |
| HUMAN HGNC=2418 UniProtKB=Q14894  | CRY<br>M  | Ketimine reductase mu-crystallin;CRYM;ortholog                       | KETIMINE REDUCTASE MU-CRYSTALLIN (PTHR13812:SF19)                     | lyase(PC00144)                                               | <i>Homo sapiens</i> |
| HUMAN HGNC=14874 UniProtKB=Q96PH1 | NOX<br>5  | NADPH oxidase 5;NOX5;ortholog                                        | NADPH OXIDASE 5 (PTHR11972:SF58)                                      | oxidase(PC00175)                                             | <i>Homo sapiens</i> |

|                                   |           |                                                                                      |                                                                                       |                                                 |                     |
|-----------------------------------|-----------|--------------------------------------------------------------------------------------|---------------------------------------------------------------------------------------|-------------------------------------------------|---------------------|
| HUMAN HGNC=6970 UniProtKB=P40925  | MD<br>HC  | Malate dehydrogenase, cytoplasmic;MDH1;ortholog                                      | MALATE DEHYDROGENASE, CYTOPLASMIC (PTHR23382:SF3)                                     | dehydrogenase(PC00092)                          | <i>Homo sapiens</i> |
| HUMAN HGNC=9280 UniProtKB=P50336  | PPO<br>X  | Protoporphyrinogen oxidase;PPOX;ortholog                                             | PROTOPORPHYRINOGEN OXIDASE (PTHR42923:SF3)                                            | DNA methyltransferase(PC00013);oxidase(PC00175) | <i>Homo sapiens</i> |
| HUMAN HGNC=2867 UniProtKB=Q02127  | PYR<br>D  | Dihydroorotate dehydrogenase (quinone), mitochondrial;DHODH;ortholog                 | DIHYDROOROTATE DEHYDROGENASE (QUINONE), MITOCHONDRIAL (PTHR43517:SF1)                 | dehydrogenase(PC00092);reductase(PC00198)       | <i>Homo sapiens</i> |
| HUMAN HGNC=13273 UniProtKB=Q9NRD8 | DUO<br>X2 | Dual oxidase 2;DUOX2;ortholog                                                        | DUAL OXIDASE 2 (PTHR11972:SF67)                                                       | oxidase(PC00175)                                | <i>Homo sapiens</i> |
| HUMAN HGNC=2265 UniProtKB=P13073  | COX<br>41 | Cytochrome c oxidase subunit 4 isoform 1, mitochondrial;COX4I1;ortholog              | CYTOCHROME C OXIDASE SUBUNIT 4 ISOFORM 1, MITOCHONDRIAL (PTHR10707:SF12)              |                                                 | <i>Homo sapiens</i> |
| HUMAN HGNC=20588 UniProtKB=Q9UHG3 | PCY<br>OX | Prenylcysteine oxidase 1;PCYOX1;ortholog                                             | PRENYLCYSTEINE OXIDASE 1 (PTHR15944:SF3)                                              |                                                 | <i>Homo sapiens</i> |
| HUMAN HGNC=17693 UniProtKB=O75911 | DHR<br>S3 | Short-chain dehydrogenase/reductase 3;DHRS3;ortholog                                 | SHORT-CHAIN DEHYDROGENASE/REDUCTASE 3 (PTHR24322:SF483)                               |                                                 | <i>Homo sapiens</i> |
| HUMAN HGNC=7708 UniProtKB=O75306  | NDU<br>S2 | NADH dehydrogenase [ubiquinone] iron-sulfur protein 2, mitochondrial;NDUFS2;ortholog | NADH DEHYDROGENASE [UBIQUINONE] IRON-SULFUR PROTEIN 2, MITOCHONDRIAL (PTHR11993:SF10) | dehydrogenase(PC00092);reductase(PC00198)       | <i>Homo sapiens</i> |

## Lipases

|                                   |         |                                                                        |                                                                         |                   |                     |
|-----------------------------------|---------|------------------------------------------------------------------------|-------------------------------------------------------------------------|-------------------|---------------------|
| HUMAN HGNC=24768 UniProtKB=Q6ZV29 | PL<br>7 | Patatin-like phospholipase domain-containing protein 7;PNPLA7;ortholog | PATATIN-LIKE PHOSPHOLIPASE DOMAIN-CONTAINING PROTEIN 7 (PTHR14226:SF23) | esterase(PC00097) | <i>Homo sapiens</i> |
|-----------------------------------|---------|------------------------------------------------------------------------|-------------------------------------------------------------------------|-------------------|---------------------|

|                                                 |                                                                                           |                                                                                            |                                                                                                                                           |                     |
|-------------------------------------------------|-------------------------------------------------------------------------------------------|--------------------------------------------------------------------------------------------|-------------------------------------------------------------------------------------------------------------------------------------------|---------------------|
| HUMAN HGNC=PL<br>16268 UniProtKB=PL<br>Q8IY17 6 | Neuropathy target<br>esterase;PNPLA6;ortholog                                             | NEUROPATHY TARGET ESTERASE<br>(PTHR14226:SF26)                                             | esterase(PC00097)                                                                                                                         | <i>Homo sapiens</i> |
| HUMAN HGNC=PL<br>9059 UniProtKB=CB<br>Q15147 4  | 1-phosphatidylinositol 4,5-<br>bisphosphate phosphodiesterase<br>beta-4;PLCB4;ortholog    | 1-PHOSPHATIDYLINOSITOL 4,5-<br>BISPHOSPHATE PHOSPHODIESTERASE<br>BETA-4 (PTHR10336:SF106)  | calcium-binding protein(PC00060);guanyl-<br>nucleotide exchange<br>factor(PC00113);phospholipase(PC00186);signali<br>ng molecule(PC00207) | <i>Homo sapiens</i> |
| HUMAN HGNC=PL<br>9062 UniProtKB=C<br>Q9BRC7 D4  | 1-phosphatidylinositol 4,5-<br>bisphosphate phosphodiesterase<br>delta-4;PLCD4;ortholog   | 1-PHOSPHATIDYLINOSITOL 4,5-<br>BISPHOSPHATE PHOSPHODIESTERASE<br>DELTA-4 (PTHR10336:SF31)  | guanyl-nucleotide exchange<br>factor(PC00113);signaling molecule(PC00207)                                                                 | <i>Homo sapiens</i> |
| HUMAN HGNC=G<br>4390 UniProtKB=NA<br>P50148 Q   | Guanine nucleotide-binding<br>protein G(q) subunit<br>alpha;GNAQ;ortholog                 | GUANINE NUCLEOTIDE-BINDING<br>PROTEIN G(Q) SUBUNIT ALPHA<br>(PTHR10218:SF318)              | heterotrimeric G-protein(PC00117)                                                                                                         | <i>Homo sapiens</i> |
| HUMAN HGNC=LI<br>18483 UniProtKB=PH<br>Q8WWY8   | Lipase member H;LIPH;ortholog                                                             | LIPASE MEMBER H (PTHR11610:SF12)                                                           | esterase(PC00097);lipase(PC00143);storage<br>protein(PC00210)                                                                             | <i>Homo sapiens</i> |
| HUMAN HGNC=5H<br>5293 UniProtKB=T2<br>P28223 A  | 5-hydroxytryptamine receptor<br>2A;HTR2A;ortholog                                         | 5-HYDROXYTRYPTAMINE RECEPTOR<br>2A (PTHR24247:SF30)                                        | G-protein coupled receptor(PC00021)                                                                                                       | <i>Homo sapiens</i> |
| HUMAN HGNC=PL<br>17175 UniProtKB=CE<br>Q9P212 1 | 1-phosphatidylinositol 4,5-<br>bisphosphate phosphodiesterase<br>epsilon-1;PLCE1;ortholog | 1-PHOSPHATIDYLINOSITOL 4,5-<br>BISPHOSPHATE PHOSPHODIESTERASE<br>EPSILON-1 (PTHR10336:SF6) | calcium-binding protein(PC00060);guanyl-<br>nucleotide exchange<br>factor(PC00113);phospholipase(PC00186);signali<br>ng molecule(PC00207) | <i>Homo sapiens</i> |
| HUMAN HGNC=A<br>277 UniProtKB=PA1<br>35348 A    | Alpha-1A adrenergic<br>receptor;ADRA1A;ortholog                                           | ALPHA-1A ADRENERGIC RECEPTOR<br>(PTHR24248:SF16)                                           | G-protein coupled receptor(PC00021)                                                                                                       | <i>Homo sapiens</i> |
| HUMAN HGNC=LI<br>9156 UniProtKB=PR<br>P54315 1  | Inactive pancreatic lipase-related<br>protein 1;PNLIPRP1;ortholog                         | INACTIVE PANCREATIC LIPASE-<br>RELATED PROTEIN 1<br>(PTHR11610:SF147)                      | esterase(PC00097);lipase(PC00143);storage<br>protein(PC00210)                                                                             | <i>Homo sapiens</i> |

|                                               |                                                          |                                                         |                                                               |                         |
|-----------------------------------------------|----------------------------------------------------------|---------------------------------------------------------|---------------------------------------------------------------|-------------------------|
| HUMAN HGNC=LI<br>6619 UniProtKB=PC<br>P11150  | Hepatic triacylglycerol<br>lipase;LIPC;ortholog          | HEPATIC TRIACYLGLYCEROL LIPASE<br>(PTHR11610:SF2)       | esterase(PC00097);lipase(PC00143);storage<br>protein(PC00210) | <i>Homo<br/>sapiens</i> |
| HUMAN HGNC=PA<br>17163 UniProtKB=G1<br>Q8NCC3 | Group XV phospholipase<br>A2;PLA2G15;ortholog            | GROUP XV PHOSPHOLIPASE A2<br>(PTHR11440:SF47)           | acyltransferase(PC00042);phospholipase(PC0018<br>6)           | <i>Homo<br/>sapiens</i> |
| HUMAN HGNC=S2<br>17018 UniProtKB=3I<br>Q9Y6Y8 | SEC23-interacting<br>protein;SEC23IP;ortholog            | SEC23-INTERACTING PROTEIN<br>(PTHR23509:SF4)            | membrane traffic<br>protein(PC00150);phospholipase(PC00186)   | <i>Homo<br/>sapiens</i> |
| HUMAN HGNC=LI<br>9155 UniProtKB=PP<br>P16233  | Pancreatic triacylglycerol<br>lipase;PNLIP;ortholog      | PANCREATIC TRIACYLGLYCEROL<br>LIPASE (PTHR11610:SF115)  | esterase(PC00097);lipase(PC00143);storage<br>protein(PC00210) | <i>Homo<br/>sapiens</i> |
| HUMAN HGNC=LI<br>9157 UniProtKB=PR<br>P54317  | Pancreatic lipase-related protein<br>2;PNLIPRP2;ortholog | PANCREATIC LIPASE-RELATED<br>PROTEIN 2 (PTHR11610:SF85) | esterase(PC00097);lipase(PC00143);storage<br>protein(PC00210) | <i>Homo<br/>sapiens</i> |
| HUMAN HGNC=LP<br>15520 UniProtKB=A<br>P43657  | Lysophosphatidic acid receptor<br>6;LPAR6;ortholog       | LYSOPHOSPHATIDIC ACID RECEPTOR<br>6 (PTHR24232:SF3)     |                                                               | <i>Homo<br/>sapiens</i> |
| HUMAN HGNC=AB<br>18718 UniProtKB=H<br>Q8WU67  | Phospholipase<br>ABHD3;ABHD3;ortholog                    | PHOSPHOLIPASE ABHD3<br>(PTHR10794:SF50)                 | serine protease(PC00203)                                      | <i>Homo<br/>sapiens</i> |
| HUMAN HGNC=A<br>278 UniProtKB=P<br>35368      | Alpha-1B adrenergic<br>receptor;ADRA1B;ortholog          | ALPHA-1B ADRENERGIC RECEPTOR<br>(PTHR24248:SF17)        | G-protein coupled receptor(PC00021)                           | <i>Homo<br/>sapiens</i> |

## Peptidase Activity

|                                   |           |                                                                               |                                                                                |                                                                                                        |                     |
|-----------------------------------|-----------|-------------------------------------------------------------------------------|--------------------------------------------------------------------------------|--------------------------------------------------------------------------------------------------------|---------------------|
| HUMAN HGNC=500 UniProtKB=P15144   | AMP<br>N  | Aminopeptidase<br>N;ANPEP;ortholog                                            | AMINOPEPTIDASE N (PTHR11533:SF172)                                             | metalloprotease(PC00153)                                                                               | <i>Homo sapiens</i> |
| HUMAN HGNC=2524 UniProtKB=P40313  | CTRL      | Chymotrypsin-like protease CTRL-1;CTRL;ortholog                               | CHYMOTRYPSIN-LIKE PROTEASE CTRL-1 (PTHR24250:SF28)                             | serine protease(PC00203)                                                                               | <i>Homo sapiens</i> |
| HUMAN HGNC=9509 UniProtKB=P49810  | PSN2      | Presenilin-2;PSEN2;ortholog                                                   | PRESENILIN-2 (PTHR10202:SF26)                                                  | aspartic protease(PC00053);calcium-binding protein(PC00060);membrane-bound signaling molecule(PC00152) | <i>Homo sapiens</i> |
| HUMAN HGNC=9344 UniProtKB=P42785  | PCP       | Lysosomal Pro-X<br>carboxypeptidase;PRCP;ortholog                             | LYSOSOMAL PRO-X CARBOXYPEPTIDASE (PTHR11010:SF38)                              | serine protease(PC00203)                                                                               | <i>Homo sapiens</i> |
| HUMAN HGNC=25679 UniProtKB=Q9BSB4 | ATG<br>A1 | Autophagy-related protein<br>101;ATG101;ortholog                              | AUTOPHAGY-RELATED PROTEIN 101 (PTHR13292:SF0)                                  |                                                                                                        | <i>Homo sapiens</i> |
| HUMAN HGNC=12623 UniProtKB=Q9UPU5 | UBP2<br>4 | Ubiquitin carboxyl-terminal<br>hydrolase 24;USP24;ortholog                    | UBIQUITIN CARBOXYL-TERMINAL<br>HYDROLASE 24 (PTHR24006:SF729)                  | cysteine protease(PC00081)                                                                             | <i>Homo sapiens</i> |
| HUMAN HGNC=25072 UniProtKB=Q5MNZ6 | WIPI3     | WD repeat domain<br>phosphoinositide-interacting<br>protein 3;WDR45B;ortholog | WD REPEAT DOMAIN<br>PHOSPHOINOSITIDE-INTERACTING<br>PROTEIN 3 (PTHR11227:SF18) |                                                                                                        | <i>Homo sapiens</i> |
| HUMAN HGNC=18173 UniProtKB=Q9NZ08 | ERAP<br>1 | Endoplasmic reticulum<br>aminopeptidase 1;ERAP1;ortholog                      | ENDOPLASMIC RETICULUM<br>AMINOPEPTIDASE 1 (PTHR11533:SF156)                    | metalloprotease(PC00153)                                                                               | <i>Homo sapiens</i> |
| HUMAN HGNC=589 UniProtKB=Q9H1Y0   | ATG5      | Autophagy protein<br>5;ATG5;ortholog                                          | AUTOPHAGY PROTEIN 5 (PTHR13040:SF2)                                            | membrane trafficking regulatory<br>protein(PC00151)                                                    | <i>Homo sapiens</i> |
| HUMAN HGNC=20635 UniProtKB=Q14997 | PSME<br>4 | Proteasome activator complex<br>subunit 4;PSME4;ortholog                      | PROTEASOME ACTIVATOR COMPLEX<br>SUBUNIT 4 (PTHR32170:SF3)                      |                                                                                                        | <i>Homo sapiens</i> |

|                                   |                                                                     |                                                                       |                            |                     |
|-----------------------------------|---------------------------------------------------------------------|-----------------------------------------------------------------------|----------------------------|---------------------|
| HUMAN HGNC=11280 UniProtKB=SQSTM1 | Sequestosome-1;SQSTM1;ortholog                                      | SEQUESTOSOME-1 (PTHR15090:SF0)                                        |                            | <i>Homo sapiens</i> |
| HUMAN HGNC=2301 UniProtKB=CBPD    | Carboxypeptidase D;CPD;ortholog                                     | CARBOXYPEPTIDASE D (PTHR11532:SF57)                                   | metalloprotease(PC00153)   | <i>Homo sapiens</i> |
| HUMAN HGNC=20068 UniProtKB=UBP4   | Ubiquitin carboxyl-terminal hydrolase 42;USP42;ortholog             | UBIQUITIN CARBOXYL-TERMINAL HYDROLASE 42 (PTHR24006:SF727)            | cysteine protease(PC00081) | <i>Homo sapiens</i> |
| HUMAN HGNC=12666 UniProtKB=TERA   | Transitional endoplasmic reticulum ATPase;VCP;ortholog              | TRANSITIONAL ENDOPLASMIC RETICULUM ATPASE (PTHR23077:SF69)            |                            | <i>Homo sapiens</i> |
| HUMAN HGNC=9532 UniProtKB=PSA3    | Proteasome subunit alpha type-3;PSMA3;ortholog                      | PROTEASOME SUBUNIT ALPHA TYPE-3 (PTHR11599:SF10)                      | protease(PC00190)          | <i>Homo sapiens</i> |
| HUMAN HGNC=12632 UniProtKB=USP9X  | Probable ubiquitin carboxyl-terminal hydrolase FAF-X;USP9X;ortholog | UBIQUITIN CARBOXYL-TERMINAL HYDROLASE FAF-X-RELATED (PTHR24006:SF732) | cysteine protease(PC00081) | <i>Homo sapiens</i> |
| HUMAN HGNC=588 UniProtKB=ATG1     | Ubiquitin-like protein ATG12;ATG12;ortholog                         | UBIQUITIN-LIKE PROTEIN ATG12 (PTHR13385:SF0)                          |                            | <i>Homo sapiens</i> |
| HUMAN HGNC=12624 UniProtKB=UBP2   | Ubiquitin carboxyl-terminal hydrolase 25;USP25;ortholog             | UBIQUITIN CARBOXYL-TERMINAL HYDROLASE 25 (PTHR24006:SF666)            | cysteine protease(PC00081) | <i>Homo sapiens</i> |
| HUMAN HGNC=29169 UniProtKB=TPPC   | Trafficking protein particle complex subunit 8;TRAPPC8;ortholog     | TRAFFICKING PROTEIN PARTICLE COMPLEX SUBUNIT 8 (PTHR12975:SF6)        |                            | <i>Homo sapiens</i> |
| HUMAN HGNC=1361 UniProtKB=AMP     | Aminopeptidase O;AOPEP;ortholog                                     | AMINOPEPTIDASE O (PTHR46627:SF1)                                      |                            | <i>Homo sapiens</i> |

|                                         |                                                     |                                                       |                                                          |                     |
|-----------------------------------------|-----------------------------------------------------|-------------------------------------------------------|----------------------------------------------------------|---------------------|
| HUMAN HGNC=9531 UniProtKB=PSA2 P25787   | Proteasome subunit alpha type-2;PSMA2;ortholog      | PROTEASOME SUBUNIT ALPHA TYPE-2 (PTHR11599:SF16)      | protease(PC00190)                                        | <i>Homo sapiens</i> |
| HUMAN HGNC=21498 UniProtKB=A16L1 Q676U5 | Autophagy-related protein 16-1;ATG16L1;ortholog     | AUTOPHAGY-RELATED PROTEIN 16-1 (PTHR19878:SF6)        |                                                          | <i>Homo sapiens</i> |
| HUMAN HGNC=20944 UniProtKB=SEN6 Q9GZR1  | Sentrin-specific protease 6;SEN6;ortholog           | SENTRIN-SPECIFIC PROTEASE 6 (PTHR46896:SF1)           | cysteine protease(PC00081)                               | <i>Homo sapiens</i> |
| HUMAN HGNC=30227 UniProtKB=SPP2A Q8TCT8 | Signal peptide peptidase-like 2A;SPPL2A;ortholog    | SIGNAL PEPTIDE PEPTIDASE-LIKE 2A (PTHR12174:SF34)     |                                                          | <i>Homo sapiens</i> |
| HUMAN HGNC=15859 UniProtKB=TASP1 Q9H6P5 | Threonine aspartase 1;TASP1;ortholog                | THREONINE ASPARTASE 1 (PTHR10188:SF8)                 | protease(PC00190)                                        | <i>Homo sapiens</i> |
| HUMAN HGNC=15991 UniProtKB=LMLN Q96KR4  | Leishmanolysin-like peptidase;LMLN;ortholog         | LEISHMANOLYSIN-LIKE PEPTIDASE (PTHR10942:SF0)         | cell adhesion molecule(PC00069);metalloprotease(PC00153) | <i>Homo sapiens</i> |
| HUMAN HGNC=28430 UniProtKB=EMC6 Q9BV81  | ER membrane protein complex subunit 6;EMC6;ortholog | ER MEMBRANE PROTEIN COMPLEX SUBUNIT 6 (PTHR20994:SF0) |                                                          | <i>Homo sapiens</i> |
| HUMAN HGNC=4248 UniProtKB=GGH Q92820    | Gamma-glutamyl hydrolase;GGH;ortholog               | GAMMA-GLUTAMYL HYDROLASE (PTHR11315:SF0)              | cysteine protease(PC00081)                               | <i>Homo sapiens</i> |
| HUMAN HGNC=16702 UniProtKB=CSN4 Q9BT78  | COP9 signalosome complex subunit 4;COPS4;ortholog   | COP9 SIGNALOSOME COMPLEX SUBUNIT 4 (PTHR10855:SF2)    |                                                          | <i>Homo sapiens</i> |
| HUMAN HGNC=586 UniProtKB=ACP H 13798    | Acylamino-acid-releasing enzyme;APEH;ortholog       | ACYLAMINO-ACID-RELEASING ENZYME (PTHR42776:SF4)       | serine protease(PC00203)                                 | <i>Homo sapiens</i> |



|                                   |                                                                                     |                                                                                     |                                                                                                        |                                                        |                     |
|-----------------------------------|-------------------------------------------------------------------------------------|-------------------------------------------------------------------------------------|--------------------------------------------------------------------------------------------------------|--------------------------------------------------------|---------------------|
| HUMAN HGNC=11820 UniProtKB=P01033 | TIMP1                                                                               | Metalloproteinase inhibitor 1;TIMP1;ortholog                                        | METALLOPROTEINASE INHIBITOR 1 (PTHR11844:SF20)                                                         | protease inhibitor(PC00191)                            | <i>Homo sapiens</i> |
| HUMAN HGNC=2240 UniProtKB=Q92905  | COP9 CSN5                                                                           | signalosome complex subunit 5;COP5;ortholog                                         | COP9 SIGNALOSOME COMPLEX SUBUNIT 5 (PTHR10410:SF6)                                                     | metalloprotease(PC00153);transcription factor(PC00218) | <i>Homo sapiens</i> |
| HUMAN HGNC=27912 UniProtKB=Q6ZMM2 | ADAMTS-like protein 5;ADAMTSL5;ortholog                                             | ADAMTS-LIKE PROTEIN 5 (PTHR13723:SF173)                                             | extracellular matrix glycoprotein(PC00100);metalloprotease(PC00153);serine protease inhibitor(PC00204) |                                                        | <i>Homo sapiens</i> |
| HUMAN HGNC=14348 UniProtKB=O43464 | HTRA2                                                                               | Serine protease HTRA2, mitochondrial;HTRA2;ortholog                                 | SERINE PROTEASE HTRA2, MITOCHONDRIAL (PTHR22939:SF109)                                                 | chaperone(PC00072);serine protease(PC00203)            | <i>Homo sapiens</i> |
| HUMAN HGNC=1499 UniProtKB=P29466  | CASP1                                                                               | Caspase-1;CASP1;ortholog                                                            | CASPASE-1 (PTHR10454:SF216)                                                                            | cysteine protease(PC00081);protease inhibitor(PC00191) | <i>Homo sapiens</i> |
| HUMAN HGNC=15722 UniProtKB=Q8WXQ8 | CBPA5                                                                               | Carboxypeptidase A5;CPA5;ortholog                                                   | CARBOXYPEPTIDASE A5 (PTHR11705:SF16)                                                                   | metalloprotease(PC00153)                               | <i>Homo sapiens</i> |
| HUMAN HGNC=14605 UniProtKB=P58397 | A disintegrin and metalloproteinase with thrombospondin motifs 12;ADAMTS12;ortholog | A DISINTEGRIN AND METALLOPROTEINASE WITH THROMBOSPONDIN MOTIFS 12 (PTHR13723:SF189) | extracellular matrix glycoprotein(PC00100);metalloprotease(PC00153);serine protease inhibitor(PC00204) |                                                        | <i>Homo sapiens</i> |
| HUMAN HGNC=6746 UniProtKB=Q14596  | NBR1                                                                                | Next to BRCA1 gene 1 protein;NBR1;ortholog                                          | NEXT TO BRCA1 GENE 1 PROTEIN (PTHR20930:SF2)                                                           |                                                        | <i>Homo sapiens</i> |
| HUMAN HGNC=24969 UniProtKB=Q8WTW4 | NPRL2                                                                               | GATOR complex protein NPRL2;NPRL2;ortholog                                          | GATOR COMPLEX PROTEIN NPRL2 (PTHR12991:SF10)                                                           | nuclease(PC00170);transcription factor(PC00218)        | <i>Homo sapiens</i> |

|                                   |           |                                                               |                                                                 |                                                                                                                |                     |
|-----------------------------------|-----------|---------------------------------------------------------------|-----------------------------------------------------------------|----------------------------------------------------------------------------------------------------------------|---------------------|
| HUMAN HGNC=20492 UniProtKB=Q96IL0 | APOP1     | Apoptogenic protein 1, mitochondrial;APOPT1;ortholog          | APOPTOGENIC PROTEIN 1, MITOCHONDRIAL (PTHR31107:SF2)            |                                                                                                                | <i>Homo sapiens</i> |
| HUMAN HGNC=14124 UniProtKB=Q12980 | NPRL3     | GATOR complex protein NPRL3;NPRL3;ortholog                    | GATOR COMPLEX PROTEIN NPRL3 (PTHR13153:SF5)                     |                                                                                                                | <i>Homo sapiens</i> |
| HUMAN HGNC=9530 UniProtKB=P25786  | PSA1      | Proteasome subunit alpha type-1;PSMA1;ortholog                | PROTEASOME SUBUNIT ALPHA TYPE-RELATED (PTHR11599:SF12)          | protease(PC00190)                                                                                              | <i>Homo sapiens</i> |
| HUMAN HGNC=3942 UniProtKB=P42345  | MTOR      | Serine/threonine-protein kinase mTOR;MTOR;ortholog            | SERINE/THREONINE-PROTEIN KINASE MTOR (PTHR11139:SF9)            | non-receptor serine/threonine protein kinase(PC00167);nucleic acid binding(PC00171);nucleotide kinase(PC00172) | <i>Homo sapiens</i> |
| HUMAN HGNC=3355 UniProtKB=Q07075  | AME       | Glutamyl aminopeptidase;ENPEP;ortholog                        | GLUTAMYL AMINOPEPTIDASE (PTHR11533:SF269)                       | metalloprotease(PC00153)                                                                                       | <i>Homo sapiens</i> |
| HUMAN HGNC=9533 UniProtKB=P25789  | PSA4      | Proteasome subunit alpha type-4;PSMA4;ortholog                | PROTEASOME SUBUNIT ALPHA TYPE-4 (PTHR11599:SF13)                | protease(PC00190)                                                                                              | <i>Homo sapiens</i> |
| HUMAN HGNC=9559 UniProtKB=Q13200  | PSMD2     | 26S proteasome non-ATPase regulatory subunit 2;PSMD2;ortholog | 26S PROTEASOME NON-ATPASE REGULATORY SUBUNIT 2 (PTHR10943:SF15) | enzyme modulator(PC00095)                                                                                      | <i>Homo sapiens</i> |
| HUMAN HGNC=590 UniProtKB=Q13490   | BIRC2     | Baculoviral IAP repeat-containing protein 2;BIRC2;ortholog    | BACULOVIRAL IAP REPEAT-CONTAINING PROTEIN 2 (PTHR10044:SF79)    | protease inhibitor(PC00191)                                                                                    | <i>Homo sapiens</i> |
| HUMAN HGNC=9358 UniProtKB=P48147  | PREP, PEP | Prolyl endopeptidase;PREP;ortholog                            | PROLYL ENDOPEPTIDASE (PTHR42881:SF2)                            | serine protease(PC00203)                                                                                       | <i>Homo sapiens</i> |

|                                        |        |                                                                        |                                                                          |                                                          |                     |
|----------------------------------------|--------|------------------------------------------------------------------------|--------------------------------------------------------------------------|----------------------------------------------------------|---------------------|
| HUMAN HGNC=7160 UniProtKB=P50281       | MMP14  | Matrix metalloproteinase-14;MMP14;ortholog                             | MATRIX METALLOPROTEINASE-14 (PTHR10201:SF24)                             | metalloprotease(PC00153)                                 | <i>Homo sapiens</i> |
| HUMAN HGNC=21408 UniProtKB=P20D2Q8IYS1 |        | Peptidase M20 domain-containing protein 2;PM20D2;ortholog              | PEPTIDASE M20 DOMAIN-CONTAINING PROTEIN 2 (PTHR30575:SF0)                | metalloprotease(PC00153);oxidoreductase(PC00176)         | <i>Homo sapiens</i> |
| HUMAN HGNC=3008 UniProtKB=Q9NY33       | DPP3   | Dipeptidyl peptidase 3;DPP3;ortholog                                   | DIPEPTIDYL PEPTIDASE 3 (PTHR23422:SF11)                                  | metalloprotease(PC00153)                                 | <i>Homo sapiens</i> |
| HUMAN HGNC=9119 UniProtKB=O75439       | MPPB   | Mitochondrial-processing peptidase subunit beta;PMPCB;ortholog         | MITOCHONDRIAL-PROCESSING PEPTIDASE SUBUNIT BETA (PTHR11851:SF103)        | metalloprotease(PC00153)                                 | <i>Homo sapiens</i> |
| HUMAN HGNC=10701 UniProtKB=Q15436      | SC23A  | Protein transport protein Sec23A;SEC23A;ortholog                       | PROTEIN TRANSPORT PROTEIN SEC23A (PTHR11141:SF7)                         | G-protein modulator(PC00022)                             | <i>Homo sapiens</i> |
| HUMAN HGNC=25402 UniProtKB=Q96G74      | OTU D5 | OTU domain-containing protein 5;OTUD5;ortholog                         | OTU DOMAIN-CONTAINING PROTEIN 5 (PTHR12419:SF4)                          | cysteine protease(PC00081);nucleic acid binding(PC00171) | <i>Homo sapiens</i> |
| HUMAN HGNC=29331 UniProtKB=Q9HCE0      | EPG5   | Ectopic P granules protein 5 homolog;EPG5;ortholog                     | ECTOPIC P GRANULES PROTEIN 5 HOMOLOG (PTHR31139:SF4)                     |                                                          | <i>Homo sapiens</i> |
| HUMAN HGNC=30627 UniProtKB=Q8TCT7      | SPP2B  | Signal peptide peptidase-like 2B;SPPL2B;ortholog                       | SIGNAL PEPTIDE PEPTIDASE-LIKE 2B (PTHR12174:SF39)                        |                                                          | <i>Homo sapiens</i> |
| HUMAN HGNC=28912 UniProtKB=Q9Y484      | WIPI4  | WD repeat domain phosphoinositide-interacting protein 4;WDR45;ortholog | WD REPEAT DOMAIN PHOSPHOINOSITIDE-INTERACTING PROTEIN 4 (PTHR11227:SF44) |                                                          | <i>Homo sapiens</i> |
| HUMAN HGNC=13557 UniProtKB=Q9BYF1      | ACE2   | Angiotensin-converting enzyme 2;ACE2;ortholog                          | ANGIOTENSIN-CONVERTING ENZYME 2 (PTHR10514:SF24)                         | metalloprotease(PC00153)                                 | <i>Homo sapiens</i> |

|                                                  |                                                                                       |                                                                                         |                                                          |                     |
|--------------------------------------------------|---------------------------------------------------------------------------------------|-----------------------------------------------------------------------------------------|----------------------------------------------------------|---------------------|
| HUMAN HGNC=20962 UniProtKB= ATG3 Q9NT62          | Ubiquitin-like-conjugating enzyme ATG3;ATG3;ortholog                                  | UBIQUITIN-LIKE-CONJUGATING ENZYME ATG3 (PTHR12866:SF2)                                  | ligase(PC00142)                                          | <i>Homo sapiens</i> |
| HUMAN HGNC=9540 UniProtKB= PSB3 P49720           | Proteasome subunit beta type-3;PSMB3;ortholog                                         | PROTEASOME SUBUNIT BETA TYPE-3 (PTHR11599:SF62)                                         | protease(PC00190)                                        | <i>Homo sapiens</i> |
| HUMAN HGNC=SPCS2 28962 UniProtKB= ,SPC2 Q15005 5 | Signal peptidase complex subunit 2;SPCS2;ortholog                                     | SIGNAL PEPTIDASE COMPLEX SUBUNIT 2 (PTHR13085:SF2)                                      | enzyme modulator(PC00095)                                | <i>Homo sapiens</i> |
| HUMAN HGNC=2482 UniProtKB= CYTB P04080           | Cystatin-B;CSTB;ortholog                                                              | CYSTATIN-B (PTHR11414:SF22)                                                             | cysteine protease inhibitor(PC00082)                     | <i>Homo sapiens</i> |
| HUMAN HGNC=2311 UniProtKB= CBPM P14384           | Carboxypeptidase M;CPM;ortholog                                                       | CARBOXYPEPTIDASE M (PTHR11532:SF84)                                                     | metalloprotease(PC00153)                                 | <i>Homo sapiens</i> |
| HUMAN HGNC=12628 UniProtKB= UBP5 P45974          | Ubiquitin carboxyl-terminal hydrolase 5;USP5;ortholog                                 | UBIQUITIN CARBOXYL-TERMINAL HYDROLASE 5 (PTHR24006:SF655)                               | cysteine protease(PC00081)                               | <i>Homo sapiens</i> |
| HUMAN HGNC=19962 UniProtKB= BAKO R Q6ZNE5        | Beclin 1-associated autophagy-related key regulator;ATG14;ortholog                    | BECLIN 1-ASSOCIATED AUTOPHAGY-RELATED KEY REGULATOR (PTHR13664:SF0)                     |                                                          | <i>Homo sapiens</i> |
| HUMAN HGNC=24281 UniProtKB= OTU6 B Q8N6M0        | OTU domain-containing protein 6B;OTUD6B;ortholog                                      | OTU DOMAIN-CONTAINING PROTEIN 6B (PTHR12419:SF21)                                       | cysteine protease(PC00081);nucleic acid binding(PC00171) | <i>Homo sapiens</i> |
| HUMAN HGNC=9472 UniProtKB= LGM N Q99538          | Legumain;LGMN;ortholog                                                                | LEGUMAIN (PTHR12000:SF38)                                                               | cysteine protease(PC00081)                               | <i>Homo sapiens</i> |
| HUMAN HGNC=2088 UniProtKB= CLPX O76031           | ATP-dependent Clp protease ATP-binding subunit clpX-like, mitochondrial;CLPX;ortholog | ATP-DEPENDENT CLP PROTEASE ATP-BINDING SUBUNIT CLPX-LIKE, MITOCHONDRIAL (PTHR11262:SF4) | chaperone(PC00072)                                       | <i>Homo sapiens</i> |

|                                        |            |                                                            |                                                            |                                                        |                     |
|----------------------------------------|------------|------------------------------------------------------------|------------------------------------------------------------|--------------------------------------------------------|---------------------|
| HUMAN HGNC=1509 UniProtKB=Q14790       | CASP8      | Caspase-8;CASP8;ortholog                                   | CASPASE-8 (PTHR10454:SF162)                                | cysteine protease(PC00081);protease inhibitor(PC00191) | <i>Homo sapiens</i> |
| HUMAN HGNC=9541 UniProtKB=P28070       | PSB4       | Proteasome subunit beta type-4;PSMB4;ortholog              | PROTEASOME SUBUNIT BETA TYPE-4 (PTHR11599:SF5)             | protease(PC00190)                                      | <i>Homo sapiens</i> |
| HUMAN HGNC=26212 UniProtKB=SPCS3P61009 | SPCS3      | Signal peptidase complex subunit 3;SPCS3;ortholog          | SIGNAL PEPTIDASE COMPLEX SUBUNIT 3 (PTHR12804:SF0)         | protease(PC00190)                                      | <i>Homo sapiens</i> |
| HUMAN HGNC=9251 UniProtKB=P10619       | PPGB       | Lysosomal protective protein;CTSA;ortholog                 | LYSOSOMAL PROTECTIVE PROTEIN (PTHR11802:SF293)             | serine protease(PC00203)                               | <i>Homo sapiens</i> |
| HUMAN HGNC=29507 UniProtKB=Q9HB40      | RISC, SCP1 | Retinoid-inducible serine carboxypeptidase;SCPEP1;ortholog | RETINOID-INDUCIBLE SERINE CARBOXYPEPTIDASE (PTHR11802:SF3) | serine protease(PC00203)                               | <i>Homo sapiens</i> |
| HUMAN HGNC=15912 UniProtKB=Q9UNZ2      | NSFL1 C    | NSFL1 cofactor p47;NSFL1C;ortholog                         | NSFL1 COFACTOR P47 (PTHR23333:SF24)                        | membrane trafficking regulatory protein(PC00151)       | <i>Homo sapiens</i> |
| HUMAN HGNC=2707 UniProtKB=P12821       | ACE        | Angiotensin-converting enzyme;ACE;ortholog                 | ANGIOTENSIN-CONVERTING ENZYME (PTHR10514:SF25)             | metalloprotease(PC00153)                               | <i>Homo sapiens</i> |
| HUMAN HGNC=18533 UniProtKB=Q86UV5      | UBP48      | Ubiquitin carboxyl-terminal hydrolase 48;USP48;ortholog    | UBIQUITIN CARBOXYL-TERMINAL HYDROLASE 48 (PTHR24006:SF722) |                                                        | <i>Homo sapiens</i> |
| HUMAN HGNC=1508 UniProtKB=P55210       | CASP7      | Caspase-7;CASP7;ortholog                                   | CASPASE-7 (PTHR10454:SF31)                                 | cysteine protease(PC00081);protease inhibitor(PC00191) | <i>Homo sapiens</i> |
| HUMAN HGNC=9534 UniProtKB=P28066       | PSA5       | Proteasome subunit alpha type-5;PSMA5;ortholog             | PROTEASOME SUBUNIT ALPHA TYPE-5 (PTHR11599:SF14)           | protease(PC00190)                                      | <i>Homo sapiens</i> |

|                                       |           |                                                                          |                                                                            |                                                                                      |                     |
|---------------------------------------|-----------|--------------------------------------------------------------------------|----------------------------------------------------------------------------|--------------------------------------------------------------------------------------|---------------------|
| HUMAN HGNC=8974 UniProtKB=Q8NEB9      | PK3C<br>3 | Phosphatidylinositol 3-kinase catalytic subunit type 3;PIK3C3;ortholog   | PHOSPHATIDYLINOSITOL 3-KINASE CATALYTIC SUBUNIT TYPE 3 (PTHR10048:SF7)     | kinase(PC00137)                                                                      | <i>Homo sapiens</i> |
| HUMAN HGNC=11345 UniProtKB=RECKO95980 |           | Reversion-inducing cysteine-rich protein with Kazal motifs;RECK;ortholog | REVERSION-INDUCING CYSTEINE-RICH PROTEIN WITH KAZAL MOTIFS (PTHR13487:SF3) | protease inhibitor(PC00191)                                                          | <i>Homo sapiens</i> |
| HUMAN HGNC=20066 UniProtKB=Q70CQ2     | UBP3<br>4 | Ubiquitin carboxyl-terminal hydrolase 34;USP34;ortholog                  | UBIQUITIN CARBOXYL-TERMINAL HYDROLASE 34 (PTHR24006:SF671)                 | cysteine protease(PC00081)                                                           | <i>Homo sapiens</i> |
| HUMAN HGNC=29028 UniProtKB=Q2TAZ0     | ATG2<br>A | Autophagy-related protein 2 homolog A;ATG2A;ortholog                     | AUTOPHAGY-RELATED PROTEIN 2 HOMOLOG A (PTHR13190:SF21)                     |                                                                                      | <i>Homo sapiens</i> |
| HUMAN HGNC=9537 UniProtKB=P20618      | PSB1      | Proteasome subunit beta type-1;PSMB1;ortholog                            | PROTEASOME SUBUNIT BETA TYPE-1 (PTHR11599:SF59)                            | protease(PC00190)                                                                    | <i>Homo sapiens</i> |
| HUMAN HGNC=30748 UniProtKB=Q9UKU6     | TRHD<br>E | Thyrotropin-releasing hormone-degrading ectoenzyme;TRHDE;ortholog        | THYROTROPIN-RELEASING HORMONE-DEGRADING ECTOENZYME (PTHR11533:SF40)        | metalloprotease(PC00153)                                                             | <i>Homo sapiens</i> |
| HUMAN HGNC=318 UniProtKB=P20933       | ASPG      | N(4)-(beta-N-acetylglucosaminyl)-L-asparaginase;AGA;ortholog             | N(4)-(BETA-N-ACETYLGLUCOSAMINYL)-L-ASPARAGINASE (PTHR10188:SF6)            | protease(PC00190)                                                                    | <i>Homo sapiens</i> |
| HUMAN HGNC=12822 UniProtKB=Q9NQW7     | XPP1      | Xaa-Pro aminopeptidase 1;XPNPEP1;ortholog                                | XAA-PRO AMINOPEPTIDASE 1 (PTHR43763:SF6)                                   | metalloprotease(PC00153);nucleic acid binding(PC00171);transcription factor(PC00218) | <i>Homo sapiens</i> |
| HUMAN HGNC=12608 UniProtKB=Q14694     | UBP1<br>0 | Ubiquitin carboxyl-terminal hydrolase 10;USP10;ortholog                  | UBIQUITIN CARBOXYL-TERMINAL HYDROLASE 10 (PTHR24006:SF687)                 | cysteine protease(PC00081)                                                           | <i>Homo sapiens</i> |
| HUMAN HGNC=3535 UniProtKB=P00734      | THRB      | Prothrombin;F2;ortholog                                                  | PROTHROMBIN (PTHR24254:SF10)                                               | serine protease(PC00203)                                                             | <i>Homo sapiens</i> |

|                                   |        |                                                                 |                                                                    |                            |                     |
|-----------------------------------|--------|-----------------------------------------------------------------|--------------------------------------------------------------------|----------------------------|---------------------|
| HUMAN HGNC=18667 UniProtKB=Q10713 | MPP A  | Mitochondrial-processing peptidase subunit alpha;PMPCA;ortholog | MITOCHONDRIAL-PROCESSING PEPTIDASE SUBUNIT ALPHA (PTHR11851:SF190) | metalloprotease(PC00153)   | <i>Homo sapiens</i> |
| HUMAN HGNC=15759 UniProtKB=Q16186 | ADR M1 | Proteasomal ubiquitin receptor ADRM1;ADRM1;ortholog             | PROTEASOMAL UBIQUITIN RECEPTOR ADRM1 (PTHR12225:SF0)               |                            | <i>Homo sapiens</i> |
| HUMAN HGNC=9544 UniProtKB=Q99436  | PSB7   | Proteasome subunit beta type-7;PSMB7;ortholog                   | PROTEASOME SUBUNIT BETA TYPE-7 (PTHR11599:SF42)                    | protease(PC00190)          | <i>Homo sapiens</i> |
| HUMAN HGNC=9758 UniProtKB=P62820  | RAB1 A | Ras-related protein Rab-1A;RAB1A;ortholog                       | RAS-RELATED PROTEIN RAB-1A (PTHR24073:SF999)                       |                            | <i>Homo sapiens</i> |
| HUMAN HGNC=20187 UniProtKB=Q96BY7 | ATG2 B | Autophagy-related protein 2 homolog B;ATG2B;ortholog            | AUTOPHAGY-RELATED PROTEIN 2 HOMOLOG B (PTHR13190:SF20)             |                            | <i>Homo sapiens</i> |
| HUMAN HGNC=7900 UniProtKB=P55786  | PSA    | Puromycin-sensitive aminopeptidase;NPEPPS;ortholog              | PUROMYCIN-SENSITIVE AMINOPEPTIDASE-RELATED (PTHR11533:SF261)       | metalloprotease(PC00153)   | <i>Homo sapiens</i> |
| HUMAN HGNC=20076 UniProtKB=Q96K76 | UBP4 7 | Ubiquitin carboxyl-terminal hydrolase 47;USP47;ortholog         | UBIQUITIN CARBOXYL-TERMINAL HYDROLASE 47 (PTHR24006:SF702)         | cysteine protease(PC00081) | <i>Homo sapiens</i> |
| HUMAN HGNC=9479 UniProtKB=P36776  | LON M  | Lon protease homolog, mitochondrial;LONP1;ortholog              | LON PROTEASE HOMOLOG, MITOCHONDRIAL (PTHR43718:SF2)                | serine protease(PC00203)   | <i>Homo sapiens</i> |
| HUMAN HGNC=9543 UniProtKB=P28072  | PSB6   | Proteasome subunit beta type-6;PSMB6;ortholog                   | PROTEASOME SUBUNIT BETA TYPE-6 (PTHR11599:SF46)                    | protease(PC00190)          | <i>Homo sapiens</i> |
| HUMAN HGNC=23080 UniProtKB=Q7RTY7 | OVC H1 | Ovochymase-1;OVCH1;ortholog                                     | OVOCHYMASE-1 (PTHR24251:SF21)                                      | serine protease(PC00203)   | <i>Homo sapiens</i> |

|                                         |                                                                     |                                                                      |                                                                                      |                     |
|-----------------------------------------|---------------------------------------------------------------------|----------------------------------------------------------------------|--------------------------------------------------------------------------------------|---------------------|
| HUMAN HGNC=16889 UniProtKB=PSDEO00487   | 26S proteasome non-ATPase regulatory subunit 14;PSMD14;ortholog     | 26S PROTEASOME NON-ATPASE REGULATORY SUBUNIT 14 (PTHR10410:SF5)      | metalloprotease(PC00153);transcription factor(PC00218)                               | <i>Homo sapiens</i> |
| HUMAN HGNC=22408 UniProtKB=ATG9A Q7Z3C6 | Autophagy-related protein 9A;ATG9A;ortholog                         | AUTOPHAGY-RELATED PROTEIN 9A (PTHR13038:SF13)                        |                                                                                      | <i>Homo sapiens</i> |
| HUMAN HGNC=24554 UniProtKB=PAMR1 Q6UXH9 | Inactive serine protease PAMR1;PAMR1;ortholog                       | INACTIVE SERINE PROTEASE PAMR1 (PTHR24254:SF9)                       | serine protease(PC00203)                                                             | <i>Homo sapiens</i> |
| HUMAN HGNC=20069 UniProtKB=UBP4 Q9NVE5  | Ubiquitin carboxyl-terminal hydrolase 40;USP40;ortholog             | UBIQUITIN CARBOXYL-TERMINAL HYDROLASE 40 (PTHR24006:SF704)           |                                                                                      | <i>Homo sapiens</i> |
| HUMAN HGNC=7162 UniProtKB=MMP16 P51512  | Matrix metalloproteinase-16;MMP16;ortholog                          | MATRIX METALLOPROTEINASE-16 (PTHR10201:SF26)                         | metalloprotease(PC00153)                                                             | <i>Homo sapiens</i> |
| HUMAN HGNC=32583 UniProtKB=MAP1 Q6UB28  | Methionine aminopeptidase 1D, mitochondrial;METAP1D;ortholog        | METHIONINE AMINOPEPTIDASE 1D, MITOCHONDRIAL (PTHR43330:SF8)          | metalloprotease(PC00153);nucleic acid binding(PC00171);transcription factor(PC00218) | <i>Homo sapiens</i> |
| HUMAN HGNC=16435 UniProtKB=HM13 Q8TCT9  | Minor histocompatibility antigen H13;HM13;ortholog                  | MINOR HISTOCOMPATIBILITY ANTIGEN H13 (PTHR12174:SF23)                | membrane-bound signaling molecule(PC00152)                                           | <i>Homo sapiens</i> |
| HUMAN HGNC=3273 UniProtKB=EIF3H O15372  | Eukaryotic translation initiation factor 3 subunit H;EIF3H;ortholog | EUKARYOTIC TRANSLATION INITIATION FACTOR 3 SUBUNIT H (PTHR10410:SF3) | metalloprotease(PC00153);transcription factor(PC00218)                               | <i>Homo sapiens</i> |
| HUMAN HGNC=19168 UniProtKB=TINA Q9GZM7  | Tubulointerstitial nephritis antigen-like;TINAGL1;ortholog          | TUBULOINTERSTITIAL NEPHRITIS ANTIGEN-LIKE (PTHR12411:SF270)          | cysteine protease(PC00081)                                                           | <i>Homo sapiens</i> |
| HUMAN HGNC=9570 UniProtKB=PSME3 P61289  | Proteasome activator complex subunit 3;PSME3;ortholog               | PROTEASOME ACTIVATOR COMPLEX SUBUNIT 3 (PTHR10660:SF4)               |                                                                                      | <i>Homo sapiens</i> |



|                                         |                                                               |                                                                |                                                                                                        |                     |
|-----------------------------------------|---------------------------------------------------------------|----------------------------------------------------------------|--------------------------------------------------------------------------------------------------------|---------------------|
| HUMAN HGNC=1480 UniProtKB=NCL1 P20807   | Calpain-3;CAPN3;ortholog                                      | CALPAIN-3 (PTHR10183:SF329)                                    | annexin(PC00050);calmodulin(PC00061);cysteine protease(PC00081)                                        | <i>Homo sapiens</i> |
| HUMAN HGNC=7157 UniProtKB=MMP11 P24347  | Stromelysin-3;MMP11;ortholog                                  | STROMELYSIN-3 (PTHR10201:SF20)                                 | metalloprotease(PC00153)                                                                               | <i>Homo sapiens</i> |
| HUMAN HGNC=16856 UniProtKB=ESPL1 Q14674 | Separin;ESPL1;ortholog                                        | SEPARIN (PTHR12792:SF0)                                        | cysteine protease(PC00081);nucleic acid binding(PC00171)                                               | <i>Homo sapiens</i> |
| HUMAN HGNC=19262 UniProtKB=PPN O95428   | Papilin;PAPLN;ortholog                                        | PAPILIN (PTHR13723:SF179)                                      | extracellular matrix glycoprotein(PC00100);metalloprotease(PC00153);serine protease inhibitor(PC00204) | <i>Homo sapiens</i> |
| HUMAN HGNC=9542 UniProtKB=PSB5 P28074   | Proteasome subunit beta type-5;PSMB5;ortholog                 | PROTEASOME SUBUNIT BETA TYPE-5 (PTHR11599:SF51)                | protease(PC00190)                                                                                      | <i>Homo sapiens</i> |
| HUMAN HGNC=9536 UniProtKB=PSA7 O14818   | Proteasome subunit alpha type-7;PSMA7;ortholog                | PROTEASOME SUBUNIT ALPHA TYPE-7 (PTHR11599:SF40)               | protease(PC00190)                                                                                      | <i>Homo sapiens</i> |
| HUMAN HGNC=29091 UniProtKB=ATG13 O75143 | Autophagy-related protein 13;ATG13;ortholog                   | AUTOPHAGY-RELATED PROTEIN 13 (PTHR13430:SF4)                   |                                                                                                        | <i>Homo sapiens</i> |
| HUMAN HGNC=19703 UniProtKB=ULK3 Q6PHR2  | Serine/threonine-protein kinase ULK3;ULK3;ortholog            | SERINE/THREONINE-PROTEIN KINASE ULK3 (PTHR24348:SF43)          | non-receptor serine/threonine protein kinase(PC00167)                                                  | <i>Homo sapiens</i> |
| HUMAN HGNC=9554 UniProtKB=PSMD1 Q99460  | 26S proteasome non-ATPase regulatory subunit 1;PSMD1;ortholog | 26S PROTEASOME NON-ATPASE REGULATORY SUBUNIT 1 (PTHR10943:SF2) | enzyme modulator(PC00095)                                                                              | <i>Homo sapiens</i> |

|                                          |                                                                        |                                                                          |                                                                                      |                     |
|------------------------------------------|------------------------------------------------------------------------|--------------------------------------------------------------------------|--------------------------------------------------------------------------------------|---------------------|
| HUMAN HGNC=32225 UniProtKB=WIPI2 Q9Y4P8  | WD repeat domain phosphoinositide-interacting protein 2;WIPI2;ortholog | WD REPEAT DOMAIN PHOSPHOINOSITIDE-INTERACTING PROTEIN 2 (PTHR11227:SF27) |                                                                                      | <i>Homo sapiens</i> |
| HUMAN HGNC=23400 UniProtKB=SC11 C Q9BY50 | Signal peptidase complex catalytic subunit SEC11C;SEC11C;ortholog      | SIGNAL PEPTIDASE COMPLEX CATALYTIC SUBUNIT SEC11C (PTHR10806:SF12)       | serine protease(PC00203)                                                             | <i>Homo sapiens</i> |
| HUMAN HGNC=2303 UniProtKB=CBPE P16870    | Carboxypeptidase E;CPE;ortholog                                        | CARBOXYPEPTIDASE E (PTHR11532:SF62)                                      | metalloprotease(PC00153)                                                             | <i>Homo sapiens</i> |
| HUMAN HGNC=4067 UniProtKB=GBRAP O95166   | Gamma-aminobutyric acid receptor-associated protein;GABARAP;ortholog   | GABARAP-A-RELATED (PTHR10969:SF20)                                       | non-motor microtubule binding protein(PC00166)                                       | <i>Homo sapiens</i> |
| HUMAN HGNC=15574 UniProtKB=RBCC1 Q8TDY2  | RB1-inducible coiled-coil protein 1;RB1CC1;ortholog                    | RB1-INDUCIBLE COILED-COIL PROTEIN 1 (PTHR13222:SF1)                      |                                                                                      | <i>Homo sapiens</i> |
| HUMAN HGNC=16935 UniProtKB=ATG7 O95352   | Ubiquitin-like modifier-activating enzyme ATG7;ATG7;ortholog           | UBIQUITIN-LIKE MODIFIER-ACTIVATING ENZYME ATG7 (PTHR10953:SF3)           | ligase(PC00142);transfer/carrier protein(PC00219)                                    | <i>Homo sapiens</i> |
| HUMAN HGNC=15789 UniProtKB=MAP11 P53582  | Methionine aminopeptidase 1;METAP1;ortholog                            | METHIONINE AMINOPEPTIDASE 1 (PTHR43330:SF7)                              | metalloprotease(PC00153);nucleic acid binding(PC00171);transcription factor(PC00218) | <i>Homo sapiens</i> |
| HUMAN HGNC=1478 UniProtKB=CAN11 Q9UMQ6   | Calpain-11;CAPN11;ortholog                                             | CALPAIN-11 (PTHR10183:SF322)                                             | annexin(PC00050);calmodulin(PC00061);cysteine protease(PC00081)                      | <i>Homo sapiens</i> |
| HUMAN HGNC=8982 UniProtKB=PI3R4 Q99570   | Phosphoinositide 3-kinase regulatory subunit 4;PIK3R4;ortholog         | PHOSPHOINOSITIDE 3-KINASE REGULATORY SUBUNIT 4 (PTHR17583:SF0)           |                                                                                      | <i>Homo sapiens</i> |
| HUMAN HGNC=2312 UniProtKB=ACBP P15169    | Carboxypeptidase N catalytic chain;CPN1;ortholog                       | CARBOXYPEPTIDASE N CATALYTIC CHAIN (PTHR11532:SF80)                      | metalloprotease(PC00153)                                                             | <i>Homo sapiens</i> |

|                                   |       |                                                                                   |                                                                                    |                                                                                                        |                     |
|-----------------------------------|-------|-----------------------------------------------------------------------------------|------------------------------------------------------------------------------------|--------------------------------------------------------------------------------------------------------|---------------------|
| HUMAN HGNC=7104 UniProtKB=Q99797  | MIPEP | Mitochondrial intermediate peptidase;MIPEP;ortholog                               | MITOCHONDRIAL INTERMEDIATE PEPTIDASE (PTHR11804:SF5)                               | metalloprotease(PC00153)                                                                               | <i>Homo sapiens</i> |
| HUMAN HGNC=12877 UniProtKB=O75844 | FACE1 | CAAX prenyl protease 1 homolog;ZMPSTE24;ortholog                                  | CAAX PRENYL PROTEASE 1 HOMOLOG (PTHR10120:SF24)                                    | metalloprotease(PC00153)                                                                               | <i>Homo sapiens</i> |
| HUMAN HGNC=1034 UniProtKB=Q14457  | BECN1 | Beclin-1;BECN1;ortholog                                                           | BECLIN-1 (PTHR12768:SF6)                                                           | protease inhibitor(PC00191)                                                                            | <i>Homo sapiens</i> |
| HUMAN HGNC=9535 UniProtKB=P60900  | PSA6  | Proteasome subunit alpha type-6;PSMA6;ortholog                                    | PROTEASOME SUBUNIT ALPHA TYPE-6 (PTHR11599:SF11)                                   | protease(PC00190)                                                                                      | <i>Homo sapiens</i> |
| HUMAN HGNC=24185 UniProtKB=P46736 | BRCC3 | Lys-63-specific deubiquitinase BRCC36;BRCC3;ortholog                              | LYS-63-SPECIFIC DEUBIQUITINASE BRCC36 (PTHR10410:SF19)                             | metalloprotease(PC00153);transcription factor(PC00218)                                                 | <i>Homo sapiens</i> |
| HUMAN HGNC=20315 UniProtKB=Q9H0Y0 | ATG10 | Ubiquitin-like-conjugating enzyme ATG10;ATG10;ortholog                            | UBIQUITIN-LIKE-CONJUGATING ENZYME ATG10 (PTHR14957:SF1)                            |                                                                                                        | <i>Homo sapiens</i> |
| HUMAN HGNC=14263 UniProtKB=Q9ULC3 | RAB23 | Ras-related protein Rab-23;RAB23;ortholog                                         | RAS-RELATED PROTEIN RAB-23 (PTHR24073:SF209)                                       |                                                                                                        | <i>Homo sapiens</i> |
| HUMAN HGNC=9539 UniProtKB=P49721  | PSB2  | Proteasome subunit beta type-2;PSMB2;ortholog                                     | PROTEASOME SUBUNIT BETA TYPE-2 (PTHR11599:SF6)                                     | protease(PC00190)                                                                                      | <i>Homo sapiens</i> |
| HUMAN HGNC=223 UniProtKB=Q9UKP4   | ATS7  | A disintegrin and metalloproteinase with thrombospondin motifs 7;ADAMTS7;ortholog | A DISINTEGRIN AND METALLOPROTEINASE WITH THROMBOSPONDIN MOTIFS 7 (PTHR13723:SF142) | extracellular matrix glycoprotein(PC00100);metalloprotease(PC00153);serine protease inhibitor(PC00204) | <i>Homo sapiens</i> |

|                                        |                                                         |                                                            |                                                                                      |                     |
|----------------------------------------|---------------------------------------------------------|------------------------------------------------------------|--------------------------------------------------------------------------------------|---------------------|
| HUMAN HGNC=12630 UniProtKB=UBP7Q93009  | Ubiquitin carboxyl-terminal hydrolase 7;USP7;ortholog   | UBIQUITIN CARBOXYL-TERMINAL HYDROLASE 7 (PTHR24006:SF753)  | cysteine protease(PC00081)                                                           | <i>Homo sapiens</i> |
| HUMAN HGNC=11793 UniProtKB=THOP1P52888 | Thimet oligopeptidase;THOP1;ortholog                    | THIMET OLIGOPEPTIDASE (PTHR11804:SF50)                     | metalloprotease(PC00153)                                                             | <i>Homo sapiens</i> |
| HUMAN HGNC=8840 UniProtKB=PEPD P12955  | Xaa-Pro dipeptidase;PEPD;ortholog                       | XAA-PRO DIPEPTIDASE (PTHR43226:SF1)                        | metalloprotease(PC00153);nucleic acid binding(PC00171);transcription factor(PC00218) | <i>Homo sapiens</i> |
| HUMAN HGNC=16448 UniProtKB=ASGL1Q7L266 | Isoaspartyl peptidase/L-asparaginase;ASRGL1;ortholog    | ISOASPARTYL PEPTIDASE/L-ASPARAGINASE (PTHR10188:SF30)      | protease(PC00190)                                                                    | <i>Homo sapiens</i> |
| HUMAN HGNC=20062 UniProtKB=UBP3Q9P275  | Ubiquitin carboxyl-terminal hydrolase 36;USP36;ortholog | UBIQUITIN CARBOXYL-TERMINAL HYDROLASE 36 (PTHR24006:SF653) | cysteine protease(PC00081)                                                           | <i>Homo sapiens</i> |

### Hydrolase Activity, ester bonds

|                                       |                                                                |                                                             |                          |                     |
|---------------------------------------|----------------------------------------------------------------|-------------------------------------------------------------|--------------------------|---------------------|
| HUMAN HGNC=33911 UniProtKB=Q6P RNK5S7 | Ribonuclease kappa;RNASEK;ortholog                             | RIBONUCLEASE KAPPA (PTHR31733:SF1)                          |                          | <i>Homo sapiens</i> |
| HUMAN HGNC=12379 UniProtKB=Q156 TSN31 | Translin;TSN;ortholog                                          | TRANSLIN (PTHR10741:SF2)                                    |                          | <i>Homo sapiens</i> |
| HUMAN HGNC=23287 UniProtKB=O95571     | ETH Persulfide dioxygenase ETHE1, mitochondrial;ETHE1;ortholog | PERSULFIDE DIOXYGENASE ETHE1, MITOCHONDRIAL (PTHR43084:SF4) | hydrolase(PC00121)       | <i>Homo sapiens</i> |
| HUMAN HGNC=24616 UniProtKB=Q8N1G1     | RNA exonuclease 1 homolog;REXO1;ortholog                       | RNA EXONUCLEASE 1 HOMOLOG (PTHR12801:SF62)                  | exoribonuclease(PC00099) | <i>Homo sapiens</i> |

|                                   |                   |                                                                        |                                                                         |                                                                       |                     |
|-----------------------------------|-------------------|------------------------------------------------------------------------|-------------------------------------------------------------------------|-----------------------------------------------------------------------|---------------------|
| HUMAN HGNC=24768 UniProtKB=Q6ZV29 | PLP<br>L7         | Patatin-like phospholipase domain-containing protein 7;PNPLA7;ortholog | PATATIN-LIKE PHOSPHOLIPASE DOMAIN-CONTAINING PROTEIN 7 (PTHR14226:SF23) | esterase(PC00097)                                                     | <i>Homo sapiens</i> |
| HUMAN HGNC=4056 UniProtKB=P35575  | G6P<br>C          | Glucose-6-phosphatase;G6PC;ortholog                                    | GLUCOSE-6-PHOSPHATASE (PTHR12591:SF3)                                   |                                                                       | <i>Homo sapiens</i> |
| HUMAN HGNC=8773 UniProtKB=Q9HCR9  | PDE<br>11         | Dual 3',5'-cyclic-AMP and -GMP phosphodiesterase 11A;PDE11A;ortholog   | DUAL 3',5'-CYCLIC-AMP AND -GMP PHOSPHODIESTERASE 11A (PTHR11347:SF130)  |                                                                       | <i>Homo sapiens</i> |
| HUMAN HGNC=3606 UniProtKB=P09467  | FBP1<br>F16<br>P1 | Fructose-1,6-bisphosphatase 1;FBP1;ortholog                            | FRUCTOSE-1,6-BISPHOSPHATASE 1 (PTHR11556:SF11)                          | carbohydrate phosphatase(PC00066)                                     | <i>Homo sapiens</i> |
| HUMAN HGNC=26911 UniProtKB=Q8N2G6 | ZCH<br>24         | Zinc finger CCHC domain-containing protein 24;ZCCHC24;ortholog         | ZINC FINGER CCHC DOMAIN-CONTAINING PROTEIN 24 (PTHR15439:SF4)           | nuclease(PC00170)                                                     | <i>Homo sapiens</i> |
| HUMAN HGNC=16268 UniProtKB=Q8IY17 | PLP<br>L6         | Neuropathy target esterase;PNPLA6;ortholog                             | NEUROPATHY TARGET ESTERASE (PTHR14226:SF26)                             | esterase(PC00097)                                                     | <i>Homo sapiens</i> |
| HUMAN HGNC=3465 UniProtKB=P10768  | EST<br>D          | S-formylglutathione hydrolase;ESD;ortholog                             | S-FORMYLGLUTATHIONE HYDROLASE (PTHR10061:SF0)                           | esterase(PC00097);serine protease(PC00203)                            | <i>Homo sapiens</i> |
| HUMAN HGNC=7618 UniProtKB=O14974  | MYP<br>T1         | Protein phosphatase 1 regulatory subunit 12A;PPP1R12A;ortholog         | PROTEIN PHOSPHATASE 1 REGULATORY SUBUNIT 12A (PTHR24179:SF20)           |                                                                       | <i>Homo sapiens</i> |
| HUMAN HGNC=7619 UniProtKB=O60237  | MYP<br>T2         | Protein phosphatase 1 regulatory subunit 12B;PPP1R12B;ortholog         | PROTEIN PHOSPHATASE 1 REGULATORY SUBUNIT 12B (PTHR24179:SF18)           |                                                                       | <i>Homo sapiens</i> |
| HUMAN HGNC=20604 UniProtKB=Q9Y2L1 | RRP<br>44         | Exosome complex exonuclease RRP44;DIS3;ortholog                        | EXOSOME COMPLEX EXONUCLEASE RRP44 (PTHR23355:SF35)                      | endoribonuclease(PC00094);exoribonuclease(PC00099);hydrolase(PC00121) | <i>Homo sapiens</i> |

|                                           |                   |                                                                      |                                                                      |                                                       |                         |
|-------------------------------------------|-------------------|----------------------------------------------------------------------|----------------------------------------------------------------------|-------------------------------------------------------|-------------------------|
| HUMAN HGNC=87<br>79 UniProtKB=Q1337<br>0  | PDE<br>3B         | cGMP-inhibited 3',5'-cyclic<br>phosphodiesterase<br>B;PDE3B;ortholog | PHOSPHODIESTERASE<br>(PTHR11347:SF29)                                |                                                       | <i>Homo<br/>sapiens</i> |
| HUMAN HGNC=99<br>89 UniProtKB=Q1549<br>3  | RGN               | Regucalcin;RGN;ortholog                                              | REGUCALCIN (PTHR10907:SF54)                                          | calcium-binding<br>protein(PC00060);esterase(PC00097) | <i>Homo<br/>sapiens</i> |
| HUMAN HGNC=17<br>851 UniProtKB=Q9Y<br>3B8 | ORN               | Oligoribonuclease,<br>mitochondrial;REXO2;ortholog                   | OLIGORIBONUCLEASE,<br>MITOCHONDRIAL (PTHR11046:SF0)                  | exoribonuclease(PC00099);hydrolase(PC00121)           | <i>Homo<br/>sapiens</i> |
| HUMAN HGNC=16<br>219 UniProtKB=Q8T<br>EA8 | DTD<br>1          | D-aminoacyl-tRNA deacylase<br>1;DTD1;ortholog                        | D-AMINOACYL-TRNA DEACYLASE 1<br>(PTHR10472:SF5)                      | esterase(PC00097)                                     | <i>Homo<br/>sapiens</i> |
| HUMAN HGNC=17<br>689 UniProtKB=Q969<br>H6 | POP<br>5          | Ribonuclease P/MRP protein<br>subunit POP5;POP5;ortholog             | RIBONUCLEASE P/MRP PROTEIN<br>SUBUNIT POP5 (PTHR10993:SF12)          |                                                       | <i>Homo<br/>sapiens</i> |
| HUMAN HGNC=22<br>197 UniProtKB=O432<br>99 | AP5<br>Z1         | AP-5 complex subunit zeta-<br>1;AP5Z1;ortholog                       | AP-5 COMPLEX SUBUNIT ZETA-1<br>(PTHR46488:SF1)                       |                                                       | <i>Homo<br/>sapiens</i> |
| HUMAN HGNC=21<br>58 UniProtKB=P0954<br>3  | CN3<br>7          | 2',3'-cyclic-nucleotide 3'-<br>phosphodiesterase;CNP;orthol<br>og    | 2',3'-CYCLIC-NUCLEOTIDE 3'-<br>PHOSPHODIESTERASE<br>(PTHR10156:SF0)  | phosphodiesterase(PC00185)                            | <i>Homo<br/>sapiens</i> |
| HUMAN HGNC=29<br>170 UniProtKB=Q9Y<br>2M0 | FAN<br>1          | Fanconi-associated nuclease<br>1;FAN1;ortholog                       | FANCONI-ASSOCIATED NUCLEASE 1<br>(PTHR15749:SF4)                     |                                                       | <i>Homo<br/>sapiens</i> |
| HUMAN HGNC=23<br>292 UniProtKB=P603<br>21 | NOS<br>2          | Nanos homolog<br>2;NANOS2;ortholog                                   | NANOS HOMOLOG 2<br>(PTHR12887:SF14)                                  | nuclease(PC00170)                                     | <i>Homo<br/>sapiens</i> |
| HUMAN HGNC=17<br>687 UniProtKB=Q9Y<br>2P8 | RCL<br>1,RP<br>C2 | RNA 3'-terminal phosphate<br>cyclase-like<br>protein;RCL1;ortholog   | RNA 3'-TERMINAL PHOSPHATE<br>CYCLASE-LIKE PROTEIN<br>(PTHR11096:SF1) | RNA binding<br>protein(PC00031);cyclase(PC00079)      | <i>Homo<br/>sapiens</i> |

|                                                |       |                                                                  |                                                                   |                                                |                     |
|------------------------------------------------|-------|------------------------------------------------------------------|-------------------------------------------------------------------|------------------------------------------------|---------------------|
| HUMAN HGNC=3367 UniProtKB=O75356               | ENTP5 | Ectonucleoside triphosphate diphosphohydrolase 5;ENTPD5;ortholog | ECTONUCLEOSIDE TRIPHOSPHATE DIPHOSPHOHYDROLASE 5 (PTHR11782:SF35) | lyase(PC00144);nucleotide phosphatase(PC00173) | <i>Homo sapiens</i> |
| HUMAN HGNC=18884 UniProtKB=Q9NUW8              | TYDP1 | Tyrosyl-DNA phosphodiesterase 1;TDP1;ortholog                    | TYROSYL-DNA PHOSPHODIESTERASE 1 (PTHR12415:SF0)                   | phosphodiesterase(PC00185)                     | <i>Homo sapiens</i> |
| HUMAN Ensembl=ENSG00000005189 UniProtKB=Q96IC2 | REXO5 | RNA exonuclease 5;REXO5;ortholog                                 | RNA EXONUCLEASE 5 (PTHR12801:SF82)                                | exoribonuclease(PC00099)                       | <i>Homo sapiens</i> |
| HUMAN HGNC=20154 UniProtKB=Q8TB40              | ABHD4 | Protein ABHD4;ABHD4;ortholog                                     | PROTEIN ABHD4 (PTHR42886:SF21)                                    |                                                | <i>Homo sapiens</i> |
| HUMAN HGNC=17059 UniProtKB=Q9NTJ5              | SAC1  | Phosphatidylinositol phosphatase SAC1;SACM1L;ortholog            | PHOSPHATIDYLINOSITIDE PHOSPHATASE SAC1 (PTHR45662:SF2)            |                                                | <i>Homo sapiens</i> |
| HUMAN HGNC=8782 UniProtKB=Q08493               | PDE4C | cAMP-specific 3',5'-cyclic phosphodiesterase 4C;PDE4C;ortholog   | CAMP-SPECIFIC 3',5'-CYCLIC PHOSPHODIESTERASE 4C (PTHR11347:SF135) |                                                | <i>Homo sapiens</i> |
| HUMAN HGNC=20614 UniProtKB=Q8NAT2              | TDRD5 | Tudor domain-containing protein 5;TDRD5;ortholog                 | TUDOR DOMAIN-CONTAINING PROTEIN 5 (PTHR22948:SF19)                | nuclease(PC00170)                              | <i>Homo sapiens</i> |
| HUMAN HGNC=15594 UniProtKB=Q9UK59              | DBR1  | Lariat debranching enzyme;DBR1;ortholog                          | LARIAT DEBRANCHING ENZYME (PTHR12849:SF0)                         | endoribonuclease(PC00094);hydrolase(PC00121)   | <i>Homo sapiens</i> |
| HUMAN HGNC=15506 UniProtKB=Q9BSV6              | SEN34 | tRNA-splicing endonuclease subunit Sen34;TSEN34;ortholog         | TRNA-SPLICING ENDONUCLEASE SUBUNIT SEN34 (PTHR13070:SF0)          | endoribonuclease(PC00094)                      | <i>Homo sapiens</i> |
| HUMAN HGNC=25671 UniProtKB=Q5TBB1              | RNH2B | Ribonuclease H2 subunit B;RNASEH2B;ortholog                      | RIBONUCLEASE H2 SUBUNIT B (PTHR13383:SF11)                        |                                                | <i>Homo sapiens</i> |

|                                   |            |                                                                                     |                                                                                          |                                                                                                                                  |                     |
|-----------------------------------|------------|-------------------------------------------------------------------------------------|------------------------------------------------------------------------------------------|----------------------------------------------------------------------------------------------------------------------------------|---------------------|
| HUMAN HGNC=24599 UniProtKB=Q9UHY7 | ENO<br>PH  | Enolase-phosphatase<br>E1;ENOPH1;ortholog                                           | ENOLASE-PHOSPHATASE E1<br>(PTHR20371:SF2)                                                | phosphatase(PC00181)                                                                                                             | <i>Homo sapiens</i> |
| HUMAN HGNC=12269 UniProtKB=Q9NSU2 | TRE<br>X1  | Three-prime repair exonuclease<br>1;TREX1;ortholog                                  | THREE-PRIME REPAIR<br>EXONUCLEASE 1 (PTHR13058:SF19)                                     |                                                                                                                                  | <i>Homo sapiens</i> |
| HUMAN HGNC=9059 UniProtKB=Q15147  | PLC<br>B4  | 1-phosphatidylinositol 4,5-bisphosphate<br>phosphodiesterase beta-4;PLCB4;ortholog  | 1-PHOSPHATIDYLINOSITOL 4,5-BISPHOSPHATE<br>PHOSPHODIESTERASE BETA-4<br>(PTHR10336:SF106) | calcium-binding protein(PC00060);guanylnucleotide exchange<br>factor(PC00113);phospholipase(PC00186);signaling molecule(PC00207) | <i>Homo sapiens</i> |
| HUMAN HGNC=8792 UniProtKB=Q9NP56  | PDE<br>7B  | cAMP-specific 3',5'-cyclic<br>phosphodiesterase<br>7B;PDE7B;ortholog                | CAMP-SPECIFIC 3',5'-CYCLIC<br>PHOSPHODIESTERASE 7B<br>(PTHR11347:SF72)                   |                                                                                                                                  | <i>Homo sapiens</i> |
| HUMAN HGNC=20097 UniProtKB=Q96LQ0 | PPR3<br>6  | Protein phosphatase 1<br>regulatory subunit<br>36;PPP1R36;ortholog                  | PROTEIN PHOSPHATASE 1<br>REGULATORY SUBUNIT 36<br>(PTHR21055:SF3)                        |                                                                                                                                  | <i>Homo sapiens</i> |
| HUMAN HGNC=9062 UniProtKB=Q9BRC7  | PLC<br>D4  | 1-phosphatidylinositol 4,5-bisphosphate<br>phosphodiesterase delta-4;PLCD4;ortholog | 1-PHOSPHATIDYLINOSITOL 4,5-BISPHOSPHATE<br>PHOSPHODIESTERASE DELTA-4<br>(PTHR10336:SF31) | guanylnucleotide exchange<br>factor(PC00113);signaling molecule(PC00207)                                                         | <i>Homo sapiens</i> |
| HUMAN HGNC=18344 UniProtKB=Q9BX68 | HINT<br>T2 | Histidine triad nucleotide-binding protein 2,<br>mitochondrial;HINT2;ortholog       | HISTIDINE TRIAD NUCLEOTIDE-BINDING PROTEIN 2,<br>MITOCHONDRIAL (PTHR23089:SF18)          | nucleotide phosphatase(PC00173)                                                                                                  | <i>Homo sapiens</i> |
| HUMAN HGNC=27696 UniProtKB=Q2TAA2 | IAH<br>1   | Isoamyl acetate-hydrolyzing<br>esterase 1<br>homolog;IAH1;ortholog                  | ISOAMYL ACETATE-HYDROLYZING<br>ESTERASE 1 HOMOLOG<br>(PTHR14209:SF9)                     |                                                                                                                                  | <i>Homo sapiens</i> |
| HUMAN HGNC=12380 UniProtKB=Q99598 | TSN<br>AX  | Translin-associated protein<br>X;TSNAX;ortholog                                     | TRANSLIN-ASSOCIATED PROTEIN X<br>(PTHR10741:SF7)                                         |                                                                                                                                  | <i>Homo sapiens</i> |



|                                   |            |                                                                     |                                                                         |                                                                       |                     |
|-----------------------------------|------------|---------------------------------------------------------------------|-------------------------------------------------------------------------|-----------------------------------------------------------------------|---------------------|
| HUMAN HGNC=14099 UniProtKB=Q9ULM6 | CCR4A      | CCR4-NOT transcription complex subunit 6;CNOT6;ortholog             | CCR4-NOT TRANSCRIPTION COMPLEX SUBUNIT 6 (PTHR12121:SF33)               | exoribonuclease(PC00099)                                              | <i>Homo sapiens</i> |
| HUMAN HGNC=14101 UniProtKB=Q9UIV1 | CNOT7,CAF1 | CCR4-NOT transcription complex subunit 7;CNOT7;ortholog             | CCR4-NOT TRANSCRIPTION COMPLEX SUBUNIT 7 (PTHR10797:SF2)                | transcription factor(PC00218)                                         | <i>Homo sapiens</i> |
| HUMAN HGNC=18466 UniProtKB=O60930 | RNH1       | Ribonuclease H1;RNASEH1;ortholog                                    | RIBONUCLEASE H1 (PTHR10642:SF0)                                         |                                                                       | <i>Homo sapiens</i> |
| HUMAN HGNC=9040 UniProtKB=Q13093  | PAFA       | Platelet-activating factor acetylhydrolase;PLA2G7;ortholog          | PLATELET-ACTIVATING FACTOR ACETYLHYDROLASE (PTHR10272:SF12)             | esterase(PC00097)                                                     | <i>Homo sapiens</i> |
| HUMAN HGNC=28417 UniProtKB=Q9BTE6 | AASD1      | Alanyl-tRNA editing protein Aarsd1;AARSD1;ortholog                  | ALANYL-TRNA EDITING PROTEIN AARSD1 (PTHR43462:SF1)                      | RNA binding protein(PC00031)                                          | <i>Homo sapiens</i> |
| HUMAN HGNC=21396 UniProtKB=Q8WTS1 | ABHD5      | 1-acylglycerol-3-phosphate O-acyltransferase ABHD5;ABHD5;ortholog   | 1-ACYLGLYCEROL-3-PHOSPHATE O-ACYLTRANSFERASE ABHD5 (PTHR42886:SF34)     |                                                                       | <i>Homo sapiens</i> |
| HUMAN HGNC=4390 UniProtKB=P50148  | GNAQ       | Guanine nucleotide-binding protein G(q) subunit alpha;GNAQ;ortholog | GUANINE NUCLEOTIDE-BINDING PROTEIN G(Q) SUBUNIT ALPHA (PTHR10218:SF318) | heterotrimeric G-protein(PC00117)                                     | <i>Homo sapiens</i> |
| HUMAN HGNC=30831 UniProtKB=Q8NHU6 | TDRD7      | Tudor domain-containing protein 7;TDRD7;ortholog                    | TUDOR DOMAIN-CONTAINING PROTEIN 7 (PTHR22948:SF14)                      | nuclease(PC00170)                                                     | <i>Homo sapiens</i> |
| HUMAN HGNC=4422 UniProtKB=P15586  | GNS        | N-acetylglucosamine-6-sulfatase;GNS;ortholog                        | N-ACETYLGLUCOSAMINE-6-SULFATASE (PTHR43108:SF5)                         | hydrolase(PC00121)                                                    | <i>Homo sapiens</i> |
| HUMAN HGNC=28698 UniProtKB=Q8TF46 | DIS3L1     | DIS3-like exonuclease 1;DIS3L1;ortholog                             | DIS3-LIKE EXONUCLEASE 1 (PTHR23355:SF30)                                | endoribonuclease(PC00094);exoribonuclease(PC00099);hydrolase(PC00121) | <i>Homo sapiens</i> |

|                                   |       |                                                                          |                                                                            |                                                                |                     |
|-----------------------------------|-------|--------------------------------------------------------------------------|----------------------------------------------------------------------------|----------------------------------------------------------------|---------------------|
| HUMAN HGNC=12791 UniProtKB=Q14191 | WRN   | Werner syndrome ATP-dependent helicase;WRN;ortholog                      | WERNER SYNDROME ATP-DEPENDENT HELICASE (PTHR13710:SF120)                   | DNA helicase(PC00011)                                          | <i>Homo sapiens</i> |
| HUMAN HGNC=18483 UniProtKB=Q8WY8  | LIPH  | Lipase member H;LIPH;ortholog                                            | LIPASE MEMBER H (PTHR11610:SF12)                                           | esterase(PC00097);lipase(PC00143);storage protein(PC00210)     | <i>Homo sapiens</i> |
| HUMAN HGNC=2326 UniProtKB=Q9UKF6  | CPSF3 | Cleavage and polyadenylation specificity factor subunit 3;CPSF3;ortholog | CLEAVAGE AND POLYADENYLATION SPECIFICITY FACTOR SUBUNIT 3 (PTHR11203:SF11) | endoribonuclease(PC00094);mRNA polyadenylation factor(PC00146) | <i>Homo sapiens</i> |
| HUMAN HGNC=24860 UniProtKB=Q5MY95 | ENTP8 | Ectonucleoside triphosphate diphosphohydrolase 8;ENTPD8;ortholog         | ECTONUCLEOSIDE TRIPHOSPHATE DIPHOSPHOHYDROLASE 8 (PTHR11782:SF31)          | lyase(PC00144);nucleotide phosphatase(PC00173)                 | <i>Homo sapiens</i> |
| HUMAN HGNC=9889 UniProtKB=Q7Z6E9  | RBBP6 | E3 ubiquitin-protein ligase RBBP6;RBBP6;ortholog                         | E3 UBIQUITIN-PROTEIN LIGASE RBBP6 (PTHR15439:SF0)                          | nuclease(PC00170)                                              | <i>Homo sapiens</i> |
| HUMAN HGNC=19909 UniProtKB=Q8N5L8 | RP25L | Ribonuclease P protein subunit p25-like protein;RPP25L;ortholog          | RIBONUCLEASE P PROTEIN SUBUNIT P25-LIKE PROTEIN (PTHR13516:SF8)            | nuclease(PC00170)                                              | <i>Homo sapiens</i> |
| HUMAN HGNC=11407 UniProtKB=Q9BXU1 | STK31 | Serine/threonine-protein kinase 31;STK31;ortholog                        | SERINE/THREONINE-PROTEIN KINASE 31 (PTHR12302:SF3)                         | nucleic acid binding(PC00171);transcription cofactor(PC00217)  | <i>Homo sapiens</i> |
| HUMAN HGNC=18042 UniProtKB=Q96LI5 | CNO6L | CCR4-NOT transcription complex subunit 6-like;CNOT6L;ortholog            | CCR4-NOT TRANSCRIPTION COMPLEX SUBUNIT 6-LIKE (PTHR12121:SF35)             | exoribonuclease(PC00099)                                       | <i>Homo sapiens</i> |
| HUMAN HGNC=19949 UniProtKB=O75817 | POP7  | Ribonuclease P protein subunit p20;POP7;ortholog                         | RIBONUCLEASE P PROTEIN SUBUNIT P20 (PTHR15314:SF1)                         | endoribonuclease(PC00094);hydrolase(PC00121)                   | <i>Homo sapiens</i> |
| HUMAN HGNC=8021 UniProtKB=P21589  | 5NTD  | 5'-nucleotidase;NT5E;ortholog                                            | 5'-NUCLEOTIDASE (PTHR11575:SF25)                                           | phosphodiesterase(PC00185)                                     | <i>Homo sapiens</i> |

|                                               |           |                                                                                               |                                                                                               |                                                                                                                                           |                         |
|-----------------------------------------------|-----------|-----------------------------------------------------------------------------------------------|-----------------------------------------------------------------------------------------------|-------------------------------------------------------------------------------------------------------------------------------------------|-------------------------|
| HUMAN HGNC=13<br>236 UniProtKB=O947RMP<br>63  |           | Unconventional prefoldin<br>RBP5 interactor<br>1;URI1;ortholog                                | UNCONVENTIONAL PREFOLDIN<br>RBP5 INTERACTOR 1 (PTHR15111:SF0)                                 | transcription factor(PC00218)                                                                                                             | <i>Homo<br/>sapiens</i> |
| HUMAN HGNC=30<br>802 UniProtKB=Q96<br>AD5     | PLP<br>L2 | Patatin-like phospholipase<br>domain-containing protein<br>2;PNPLA2;ortholog                  | PATATIN-LIKE PHOSPHOLIPASE<br>DOMAIN-CONTAINING PROTEIN 2<br>(PTHR12406:SF29)                 | acyltransferase(PC00042);phospholipase(PC0018<br>6)                                                                                       | <i>Homo<br/>sapiens</i> |
| HUMAN HGNC=52<br>93 UniProtKB=P2822<br>3      | 5HT<br>2A | 5-hydroxytryptamine receptor<br>2A;HTR2A;ortholog                                             | 5-HYDROXYTRYPTAMINE<br>RECEPTOR 2A (PTHR24247:SF30)                                           | G-protein coupled receptor(PC00021)                                                                                                       | <i>Homo<br/>sapiens</i> |
| HUMAN HGNC=16<br>650 UniProtKB=Q9H<br>9J2     | RM4<br>4  | 39S ribosomal protein L44,<br>mitochondrial;MRPL44;ortholo<br>g                               | 39S RIBOSOMAL PROTEIN L44,<br>MITOCHONDRIAL (PTHR11207:SF5)                                   | endoribonuclease(PC00094)                                                                                                                 | <i>Homo<br/>sapiens</i> |
| HUMAN HGNC=23<br>845 UniProtKB=Q8IYSLX4<br>92 |           | Structure-specific endonuclease<br>subunit SLX4;SLX4;ortholog                                 | STRUCTURE-SPECIFIC<br>ENDONUCLEASE SUBUNIT SLX4<br>(PTHR21541:SF3)                            |                                                                                                                                           | <i>Homo<br/>sapiens</i> |
| HUMAN HGNC=24<br>84 UniProtKB=P3324<br>0      | CST<br>F2 | Cleavage stimulation factor<br>subunit 2;CSTF2;ortholog                                       | CLEAVAGE STIMULATION FACTOR<br>SUBUNIT 2 (PTHR45735:SF6)                                      | mRNA splicing factor(PC00148)                                                                                                             | <i>Homo<br/>sapiens</i> |
| HUMAN HGNC=10<br>293 UniProtKB=Q96<br>AT9     | RPE       | Ribulose-phosphate 3-<br>epimerase;RPE;ortholog                                               | RIBULOSE-PHOSPHATE 3-<br>EPIMERASE-RELATED<br>(PTHR11749:SF9)                                 |                                                                                                                                           | <i>Homo<br/>sapiens</i> |
| HUMAN HGNC=17<br>175 UniProtKB=Q9P<br>212     | PLC<br>E1 | 1-phosphatidylinositol 4,5-<br>bisphosphate<br>phosphodiesterase epsilon-<br>1;PLCE1;ortholog | 1-PHOSPHATIDYLINOSITOL 4,5-<br>BISPHOSPHATE<br>PHOSPHODIESTERASE EPSILON-1<br>(PTHR10336:SF6) | calcium-binding protein(PC00060);guanyl-<br>nucleotide exchange<br>factor(PC00113);phospholipase(PC00186);signali<br>ng molecule(PC00207) | <i>Homo<br/>sapiens</i> |
| HUMAN HGNC=21<br>300 UniProtKB=Q9H<br>633     | RPP2<br>1 | Ribonuclease P protein subunit<br>p21;RPP21;ortholog                                          | RIBONUCLEASE P PROTEIN<br>SUBUNIT P21 (PTHR14742:SF0)                                         | hydrolase(PC00121);nuclease(PC00170)                                                                                                      | <i>Homo<br/>sapiens</i> |

|                                           |                    |                                                                        |                                                                        |                                                                                                                                 |                         |
|-------------------------------------------|--------------------|------------------------------------------------------------------------|------------------------------------------------------------------------|---------------------------------------------------------------------------------------------------------------------------------|-------------------------|
| HUMAN HGNC=17<br>641 UniProtKB=Q9H<br>816 | DCR<br>1B          | 5' exonuclease<br>Apollo;DCLRE1B;ortholog                              | 5' EXONUCLEASE APOLLO<br>(PTHR23240:SF27)                              |                                                                                                                                 | <i>Homo<br/>sapiens</i> |
| HUMAN HGNC=36<br>50 UniProtKB=P3974<br>8  | FEN<br>1           | Flap endonuclease<br>1;FEN1;ortholog                                   | FLAP ENDONUCLEASE 1<br>(PTHR11081:SF54)                                | damaged DNA-binding<br>protein(PC00086);endodeoxyribonuclease(PC000<br>93);exodeoxyribonuclease(PC00098);hydrolase(P<br>C00121) | <i>Homo<br/>sapiens</i> |
| HUMAN HGNC=27<br>7 UniProtKB=P35348       | ADA<br>1A          | Alpha-1A adrenergic<br>receptor;ADRA1A;ortholog                        | ALPHA-1A ADRENERGIC RECEPTOR<br>(PTHR24248:SF16)                       | G-protein coupled receptor(PC00021)                                                                                             | <i>Homo<br/>sapiens</i> |
| HUMAN HGNC=21<br>339 UniProtKB=O605<br>22 | TDR<br>D6          | Tudor domain-containing<br>protein 6;TDRD6;ortholog                    | TUDOR DOMAIN-CONTAINING<br>PROTEIN 6 (PTHR22948:SF15)                  | nuclease(PC00170)                                                                                                               | <i>Homo<br/>sapiens</i> |
| HUMAN HGNC=26<br>019 UniProtKB=Q9N<br>X62 | IMP<br>A3          | Inositol monophosphatase<br>3;IMPAD1;ortholog                          | INOSITOL MONOPHOSPHATASE 3<br>(PTHR43028:SF6)                          | phosphatase(PC00181)                                                                                                            | <i>Homo<br/>sapiens</i> |
| HUMAN HGNC=21<br>416 UniProtKB=Q924<br>85 | ASM<br>3B          | Acid sphingomyelinase-like<br>phosphodiesterase<br>3b;SMPDL3B;ortholog | ACID SPHINGOMYELINASE-LIKE<br>PHOSPHODIESTERASE 3B<br>(PTHR10340:SF25) | phosphodiesterase(PC00185)                                                                                                      | <i>Homo<br/>sapiens</i> |
| HUMAN HGNC=17<br>660 UniProtKB=Q6PJ<br>P8 | SNM<br>1,DC<br>R1A | DNA cross-link repair 1A<br>protein;DCLRE1A;ortholog                   | DNA CROSS-LINK REPAIR 1A<br>PROTEIN (PTHR23240:SF6)                    |                                                                                                                                 | <i>Homo<br/>sapiens</i> |
| HUMAN HGNC=17<br>889 UniProtKB=Q9U<br>BZ4 | APE<br>X2          | DNA-(apurinic or apyrimidinic<br>site) lyase 2;APEX2;ortholog          | DNA-(APURINIC OR APYRIMIDINIC<br>SITE) LYASE 2 (PTHR22748:SF4)         |                                                                                                                                 | <i>Homo<br/>sapiens</i> |
| HUMAN HGNC=21<br>185 UniProtKB=Q8N<br>A58 | PND<br>C1          | Poly(A)-specific ribonuclease<br>PNLDC1;PNLDC1;ortholog                | POLY(A)-SPECIFIC RIBONUCLEASE<br>PNLDC1 (PTHR15092:SF22)               | mRNA polyadenylation factor(PC00146)                                                                                            | <i>Homo<br/>sapiens</i> |
| HUMAN HGNC=25<br>044 UniProtKB=Q587<br>J7 | TDR<br>12          | Putative ATP-dependent RNA<br>helicase<br>TDRD12;TDRD12;ortholog       | ATP-DEPENDENT RNA HELICASE<br>TDRD12-RELATED (PTHR22948:SF31)          | nuclease(PC00170);signaling molecule(PC00207)                                                                                   | <i>Homo<br/>sapiens</i> |

|                                    |       |                                                                      |                                                                        |                                                                       |                     |
|------------------------------------|-------|----------------------------------------------------------------------|------------------------------------------------------------------------|-----------------------------------------------------------------------|---------------------|
| HUMAN HGNC=24763 UniProtKB=Q6ZVT6  | CC067 | Uncharacterized protein C3orf67;C3orf67;ortholog                     | ZGC:162324 (PTHR12458:SF7)                                             | nuclease(PC00170);transcription factor(PC00218)                       | <i>Homo sapiens</i> |
| HUMAN HGNC=17098 UniProtKB=Q9UPY3  | DICER | Endoribonuclease Dicer;DICER1;ortholog                               | ENDORIBONUCLEASE DICER (PTHR14950:SF37)                                | endodeoxyribonuclease(PC00093)                                        | <i>Homo sapiens</i> |
| HUMAN HGNC=12836 UniProtKB=Q9H0D6  | XRN2  | 5'-3' exoribonuclease 2;XRN2;ortholog                                | 5'-3' EXORIBONUCLEASE 2 (PTHR12341:SF59)                               | exoribonuclease(PC00099)                                              | <i>Homo sapiens</i> |
| HUMAN HGNC=20074 UniProtKB=Q504Q3  | PAN2  | PAN2-PAN3 deadenylation complex catalytic subunit PAN2;PAN2;ortholog | PAN2-PAN3 DEADENYLATION COMPLEX CATALYTIC SUBUNIT PAN2 (PTHR15728:SF0) | cysteine protease(PC00081);esterase(PC00097);exoribonuclease(PC00099) | <i>Homo sapiens</i> |
| HUMAN HGNC=24660 UniProtKB=Q8IXG06 | GOR   | Putative exonuclease GOR;REXO1L1P;ortholog                           | EXONUCLEASE GOR-RELATED (PTHR12801:SF22)                               | exoribonuclease(PC00099)                                              | <i>Homo sapiens</i> |
| HUMAN HGNC=25026 UniProtKB=Q8NEB5  | PLP5  | Phospholipid phosphatase 5;PLPP5;ortholog                            | PHOSPHOLIPID PHOSPHATASE 5 (PTHR10165:SF87)                            | phosphatase(PC00181);pyrophosphatase(PC00196)                         | <i>Homo sapiens</i> |
| HUMAN HGNC=10297 UniProtKB=P49247  | RPIA  | Ribose-5-phosphate isomerase;RPIA;ortholog                           | RIBOSE-5-PHOSPHATE ISOMERASE (PTHR11934:SF0)                           |                                                                       | <i>Homo sapiens</i> |
| HUMAN HGNC=9156 UniProtKB=P54315   | LIPR1 | Inactive pancreatic lipase-related protein 1;PNLIPRP1;ortholog       | INACTIVE PANCREATIC LIPASE-RELATED PROTEIN 1 (PTHR11610:SF147)         | esterase(PC00097);lipase(PC00143);storage protein(PC00210)            | <i>Homo sapiens</i> |
| HUMAN HGNC=6619 UniProtKB=P11150   | LIPC  | Hepatic triacylglycerol lipase;LIPC;ortholog                         | HEPATIC TRIACYLGLYCEROL LIPASE (PTHR11610:SF2)                         | esterase(PC00097);lipase(PC00143);storage protein(PC00210)            | <i>Homo sapiens</i> |
| HUMAN HGNC=6737 UniProtKB=O75608   | LYPA1 | Acyl-protein thioesterase 1;LYPLA1;ortholog                          | ACYL-PROTEIN THIOESTERASE 1 (PTHR10655:SF22)                           |                                                                       | <i>Homo sapiens</i> |

|                                   |       |                                                                                 |                                                                                   |                                                          |                     |
|-----------------------------------|-------|---------------------------------------------------------------------------------|-----------------------------------------------------------------------------------|----------------------------------------------------------|---------------------|
| HUMAN HGNC=23044 UniProtKB=Q8WY41 | NOS1  | Nanos homolog 1;NANOS1;ortholog                                                 | NANOS HOMOLOG 1 (PTHR12887:SF6)                                                   | nuclease(PC00170)                                        | <i>Homo sapiens</i> |
| HUMAN HGNC=17163 UniProtKB=Q8NCC3 | PAG15 | Group XV phospholipase A2;PLA2G15;ortholog                                      | GROUP XV PHOSPHOLIPASE A2 (PTHR11440:SF47)                                        | acyltransferase(PC00042);phospholipase(PC00186)          | <i>Homo sapiens</i> |
| HUMAN HGNC=3066 UniProtKB=O75319  | DUS11 | RNA/RNP complex-1-interacting phosphatase;DUSP11;ortholog                       | RNA/RNP COMPLEX-1-INTERACTING PHOSPHATASE (PTHR10367:SF9)                         | nucleotidyltransferase(PC00174);phosphatase(PC00181)     | <i>Homo sapiens</i> |
| HUMAN HGNC=25364 UniProtKB=Q9H0R4 | HDHD2 | Haloacid dehalogenase-like hydrolase domain-containing protein 2;HDHD2;ortholog | HALOACID DEHALOGENASE-LIKE HYDROLASE DOMAIN-CONTAINING PROTEIN 2 (PTHR19288:SF43) | Homo sapiens                                             |                     |
| HUMAN HGNC=24220 UniProtKB=Q6P1N9 | TATD1 | Putative deoxyribonuclease TATDN1;TATDN1;ortholog                               | DEOXYRIBONUCLEASE TATDN1-RELATED (PTHR10060:SF15)                                 |                                                          | <i>Homo sapiens</i> |
| HUMAN HGNC=17086 UniProtKB=Q9H0L4 | CSTFT | Cleavage stimulation factor subunit 2 tau variant;CSTF2T;ortholog               | CLEAVAGE STIMULATION FACTOR SUBUNIT 2 TAU VARIANT (PTHR45735:SF3)                 | mRNA splicing factor(PC00148)                            | <i>Homo sapiens</i> |
| HUMAN HGNC=9827 UniProtKB=Q99638  | RAD9A | Cell cycle checkpoint control protein RAD9A;RAD9A;ortholog                      | CELL CYCLE CHECKPOINT CONTROL PROTEIN RAD9A (PTHR15237:SF1)                       | kinase activator(PC00138)                                | <i>Homo sapiens</i> |
| HUMAN HGNC=11120 UniProtKB=P17405 | ASMP  | Sphingomyelin phosphodiesterase;SMPD1;ortholog                                  | SPHINGOMYELIN PHOSPHODIESTERASE (PTHR10340:SF34)                                  | phosphodiesterase(PC00185)                               | <i>Homo sapiens</i> |
| HUMAN HGNC=17018 UniProtKB=Q9Y6Y8 | S23IP | SEC23-interacting protein;SEC23IP;ortholog                                      | SEC23-INTERACTING PROTEIN (PTHR23509:SF4)                                         | membrane traffic protein(PC00150);phospholipase(PC00186) | <i>Homo sapiens</i> |

|                                           |                   |                                                                |                                                            |                                                                                            |                     |
|-------------------------------------------|-------------------|----------------------------------------------------------------|------------------------------------------------------------|--------------------------------------------------------------------------------------------|---------------------|
| HUMAN HGNC=24<br>644 UniProtKB=Q9U<br>PR3 | SMG<br>5          | Protein SMG5;SMG5;ortholog                                     | PROTEIN SMG5 (PTHR15696:SF7)                               |                                                                                            | <i>Homo sapiens</i> |
| HUMAN HGNC=33<br>882 UniProtKB=Q9B<br>T40 | PPS,I<br>NP5<br>K | Inositol polyphosphate 5-phosphatase<br>K;INPP5K;ortholog      | INOSITOL POLYPHOSPHATE 5-PHOSPHATASE K (PTHR11200:SF117)   | phosphatase(PC00181)                                                                       | <i>Homo sapiens</i> |
| HUMAN HGNC=14<br>254 UniProtKB=Q9U<br>K39 | NOC               | Nocturnin;NOCT;ortholog                                        | NOCTURNIN (PTHR12121:SF45)                                 | exoribonuclease(PC00099)                                                                   | <i>Homo sapiens</i> |
| HUMAN HGNC=28<br>142 UniProtKB=Q9B<br>T23 | LIM<br>D2         | LIM domain-containing protein 2;LIMD2;ortholog                 | LIM DOMAIN-CONTAINING PROTEIN 2 (PTHR24206:SF58)           | actin family cytoskeletal protein(PC00041);nuclease(PC00170);transcription factor(PC00218) | <i>Homo sapiens</i> |
| HUMAN HGNC=58<br>7 UniProtKB=P27695       | APE<br>X1         | DNA-(apurinic or apyrimidinic site) lyase;APEX1;ortholog       | DNA-(APURINIC OR APYRIMIDINIC SITE) LYASE (PTHR22748:SF6)  |                                                                                            | <i>Homo sapiens</i> |
| HUMAN HGNC=92<br>07 UniProtKB=Q9UF<br>F9  | CAF<br>1B         | CCR4-NOT transcription complex subunit 8;CNOT8;ortholog        | CCR4-NOT TRANSCRIPTION COMPLEX SUBUNIT 8 (PTHR10797:SF1)   | transcription factor(PC00218)                                                              | <i>Homo sapiens</i> |
| HUMAN HGNC=91<br>55 UniProtKB=P1623<br>3  | LIPP              | Pancreatic triacylglycerol lipase;PNLIP;ortholog               | PANCREATIC TRIACYLGLYCEROL LIPASE (PTHR11610:SF115)        | esterase(PC00097);lipase(PC00143);storage protein(PC00210)                                 | <i>Homo sapiens</i> |
| HUMAN HGNC=28<br>424 UniProtKB=Q9B<br>Q61 | TRIR              | Telomerase RNA component interacting RNase;TRIR;ortholog       | TELOMERASE RNA COMPONENT INTERACTING RNASE (PTHR34753:SF1) |                                                                                            | <i>Homo sapiens</i> |
| HUMAN HGNC=87<br>78 UniProtKB=Q1443<br>2  | PDE<br>3A         | cGMP-inhibited 3',5'-cyclic phosphodiesterase A;PDE3A;ortholog | PHOSPHODIESTERASE (PTHR11347:SF104)                        |                                                                                            | <i>Homo sapiens</i> |
| HUMAN HGNC=15<br>984 UniProtKB=Q7Z<br>2E3 | APT<br>X          | Aprataxin;APTX;ortholog                                        | APRATAXIN (PTHR12486:SF4)                                  | damaged DNA-binding protein(PC00086)                                                       | <i>Homo sapiens</i> |

|                                   |                  |                                                               |                                                                |                                                   |                     |
|-----------------------------------|------------------|---------------------------------------------------------------|----------------------------------------------------------------|---------------------------------------------------|---------------------|
| HUMAN HGNC=9177 UniProtKB=Q07864  | DPO<br>E1        | DNA polymerase epsilon catalytic subunit A;POLE;ortholog      | DNA POLYMERASE EPSILON CATALYTIC SUBUNIT A (PTHR10670:SF0)     |                                                   | <i>Homo sapiens</i> |
| HUMAN HGNC=20999 UniProtKB=Q9NPJ3 | ACO<br>13        | Acyl-coenzyme A thioesterase 13;ACOT13;ortholog               | ACYL-COENZYME A THIOESTERASE 13 (PTHR21660:SF1)                |                                                   | <i>Homo sapiens</i> |
| HUMAN HGNC=11712 UniProtKB=Q9BXT4 | TDR<br>D1        | Tudor domain-containing protein 1;TDRD1;ortholog              | TUDOR DOMAIN-CONTAINING PROTEIN 1 (PTHR22948:SF4)              | nuclease(PC00170)                                 | <i>Homo sapiens</i> |
| HUMAN HGNC=9891 UniProtKB=Q99708  | CTIP<br>SAE<br>2 | DNA endonuclease RBBP8;RBBP8;ortholog                         | DNA ENDONUCLEASE RBBP8 (PTHR15107:SF4)                         | transcription cofactor(PC00217)                   | <i>Homo sapiens</i> |
| HUMAN HGNC=12270 UniProtKB=Q9BQ50 | TRE<br>X2        | Three prime repair exonuclease 2;TREX2;ortholog               | THREE PRIME REPAIR EXONUCLEASE 2 (PTHR13058:SF24)              |                                                   | <i>Homo sapiens</i> |
| HUMAN HGNC=28422 UniProtKB=Q8NCE0 | SEN<br>2         | tRNA-splicing endonuclease subunit Sen2;TSEN2;ortholog        | TRNA-SPLICING ENDONUCLEASE SUBUNIT SEN2 (PTHR21227:SF0)        | endodeoxyribonuclease(PC00093);hydrolase(PC00121) | <i>Homo sapiens</i> |
| HUMAN HGNC=23994 UniProtKB=Q8IV48 | ERI1             | 3'-5' exoribonuclease 1;ERI1;ortholog                         | 3'-5' EXORIBONUCLEASE 1 (PTHR23044:SF27)                       | esterase(PC00097);exoribonuclease(PC00099)        | <i>Homo sapiens</i> |
| HUMAN HGNC=16205 UniProtKB=Q9BQP7 | MG<br>ME1        | Mitochondrial genome maintenance exonuclease 1;MGME1;ortholog | MITOCHONDRIAL GENOME MAINTENANCE EXONUCLEASE 1 (PTHR31340:SF3) |                                                   | <i>Homo sapiens</i> |
| HUMAN HGNC=8909 UniProtKB=A6NDG6  | PGP              | Glycerol-3-phosphate phosphatase;PGP;ortholog                 | GLYCEROL-3-PHOSPHATE PHOSPHATASE (PTHR19288:SF69)              |                                                   | <i>Homo sapiens</i> |
| HUMAN HGNC=9229 UniProtKB=O14495  | PLP<br>P3        | Phospholipid phosphatase 3;PLPP3;ortholog                     | PHOSPHOLIPID PHOSPHATASE 3 (PTHR10165:SF79)                    | phosphatase(PC00181);pyrophosphatase(PC00196)     | <i>Homo sapiens</i> |



|                                           |                    |                                                                    |                                                                      |                                                                                                           |                         |
|-------------------------------------------|--------------------|--------------------------------------------------------------------|----------------------------------------------------------------------|-----------------------------------------------------------------------------------------------------------|-------------------------|
| HUMAN HGNC=91<br>57 UniProtKB=P5431<br>7  | LIPR<br>2          | Pancreatic lipase-related<br>protein 2;PNLIPRP2;ortholog           | PANCREATIC LIPASE-RELATED<br>PROTEIN 2 (PTHR11610:SF85)              | esterase(PC00097);lipase(PC00143);storage<br>protein(PC00210)                                             | <i>Homo<br/>sapiens</i> |
| HUMAN HGNC=20<br>217 UniProtKB=Q9N<br>VH0 | EXD<br>2           | Exonuclease 3'-5' domain-<br>containing protein<br>2;EXD2;ortholog | EXONUCLEASE 3'-5' DOMAIN-<br>CONTAINING PROTEIN 2<br>(PTHR13620:SF0) | nuclease(PC00170)                                                                                         | <i>Homo<br/>sapiens</i> |
| HUMAN HGNC=23<br>719 UniProtKB=Q96<br>FM1 | PGA<br>P3          | Post-GPI attachment to<br>proteins factor<br>3;PGAP3;ortholog      | POST-GPI ATTACHMENT TO<br>PROTEINS FACTOR 3 (PTHR13148:SF0)          |                                                                                                           | <i>Homo<br/>sapiens</i> |
| HUMAN HGNC=49<br>12 UniProtKB=P4977<br>3  | HIN<br>T1,H<br>INT | Histidine triad nucleotide-<br>binding protein<br>1;HINT1;ortholog | HISTIDINE TRIAD NUCLEOTIDE-<br>BINDING PROTEIN 1<br>(PTHR23089:SF44) | nucleotide phosphatase(PC00173)                                                                           | <i>Homo<br/>sapiens</i> |
| HUMAN HGNC=25<br>499 UniProtKB=Q9N<br>W75 | GPT<br>C2          | G patch domain-containing<br>protein 2;GPATCH2;ortholog            | G PATCH DOMAIN-CONTAINING<br>PROTEIN 2 (PTHR14195:SF4)               | nucleic acid binding(PC00171)                                                                             | <i>Homo<br/>sapiens</i> |
| HUMAN HGNC=91<br>79 UniProtKB=P5409<br>8  | DPO<br>G1          | DNA polymerase subunit<br>gamma-1;POLG;ortholog                    | DNA POLYMERASE SUBUNIT<br>GAMMA-1 (PTHR10267:SF0)                    | DNA-directed DNA<br>polymerase(PC00018);exodeoxyribonuclease(PC<br>00098);nucleotidyltransferase(PC00174) | <i>Homo<br/>sapiens</i> |
| HUMAN HGNC=30<br>081 UniProtKB=O957<br>07 | RPP2<br>9          | Ribonuclease P protein subunit<br>p29;POP4;ortholog                | RIBONUCLEASE P PROTEIN<br>SUBUNIT P29 (PTHR13348:SF0)                |                                                                                                           | <i>Homo<br/>sapiens</i> |
| HUMAN HGNC=26<br>023 UniProtKB=Q8N<br>9H8 | MUT<br>7           | Exonuclease mut-7<br>homolog;EXD3;ortholog                         | EXONUCLEASE MUT-7 HOMOLOG<br>(PTHR13620:SF42)                        | nuclease(PC00170)                                                                                         | <i>Homo<br/>sapiens</i> |
| HUMAN HGNC=90<br>35 UniProtKB=P4771<br>2  | PA2<br>4A          | Cytosolic phospholipase<br>A2;PLA2G4A;ortholog                     | CYTOSOLIC PHOSPHOLIPASE A2<br>(PTHR10728:SF13)                       | phospholipase(PC00186)                                                                                    | <i>Homo<br/>sapiens</i> |
| HUMAN HGNC=19<br>124 UniProtKB=Q6U<br>N15 | FIP1               | Pre-mRNA 3'-end-processing<br>factor FIP1;FIP1L1;ortholog          | PRE-MRNA 3'-END-PROCESSING<br>FACTOR FIP1 (PTHR13484:SF5)            |                                                                                                           | <i>Homo<br/>sapiens</i> |

|                                           |           |                                                                                          |                                                                                            |                                                                 |                         |
|-------------------------------------------|-----------|------------------------------------------------------------------------------------------|--------------------------------------------------------------------------------------------|-----------------------------------------------------------------|-------------------------|
| HUMAN HGNC=29<br>523 UniProtKB=Q9Y<br>6A4 | CFA<br>20 | Cilia- and flagella-associated<br>protein 20;CFAP20;ortholog                             | CILIA- AND FLAGELLA-<br>ASSOCIATED PROTEIN 20<br>(PTHR12458:SF8)                           | nuclease(PC00170);transcription factor(PC00218)                 | <i>Homo<br/>sapiens</i> |
| HUMAN HGNC=15<br>520 UniProtKB=P436<br>57 | LPA<br>R6 | Lysophosphatidic acid receptor<br>6;LPA6;ortholog                                        | LYSOPHOSPHATIDIC ACID<br>RECEPTOR 6 (PTHR24232:SF3)                                        |                                                                 | <i>Homo<br/>sapiens</i> |
| HUMAN HGNC=19<br>958 UniProtKB=O150<br>91 | MRP<br>P3 | Mitochondrial ribonuclease P<br>catalytic<br>subunit;KIAA0391;ortholog                   | MITOCHONDRIAL RIBONUCLEASE P<br>CATALYTIC SUBUNIT<br>(PTHR13547:SF1)                       |                                                                 | <i>Homo<br/>sapiens</i> |
| HUMAN HGNC=36<br>7 UniProtKB=Q92667       | AKA<br>P1 | A-kinase anchor protein 1,<br>mitochondrial;AKAP1;ortholog                               | A-KINASE ANCHOR PROTEIN 1,<br>MITOCHONDRIAL (PTHR22948:SF48)                               | nuclease(PC00170);signaling molecule(PC00207)                   | <i>Homo<br/>sapiens</i> |
| HUMAN HGNC=89<br>03 UniProtKB=O9533<br>6  | 6PG<br>L  | 6-<br>phosphogluconolactonase;PGL<br>S;ortholog                                          | 6-PHOSPHOGLUCONOLACTONASE<br>(PTHR11054:SF0)                                               | hydrolase(PC00121)                                              | <i>Homo<br/>sapiens</i> |
| HUMAN HGNC=95<br>77 UniProtKB=P7833<br>0  | SER<br>B  | Phosphoserine<br>phosphatase;PSPH;ortholog                                               | PHOSPHOSERINE PHOSPHATASE<br>(PTHR43344:SF2)                                               | phosphatase(PC00181)                                            | <i>Homo<br/>sapiens</i> |
| HUMAN HGNC=92<br>28 UniProtKB=O1449<br>4  | LPP1      | Phospholipid phosphatase<br>1;PLPP1;ortholog                                             | PHOSPHOLIPID PHOSPHATASE 1<br>(PTHR10165:SF26)                                             | phosphatase(PC00181);pyrophosphatase(PC0019<br>6)               | <i>Homo<br/>sapiens</i> |
| HUMAN HGNC=14<br>451 UniProtKB=Q9B<br>QK8 | LPI<br>N3 | Phosphatidate phosphatase<br>LPIN3;LPIN3;ortholog                                        | PHOSPHATIDATE PHOSPHATASE<br>LPIN3 (PTHR12181:SF60)                                        |                                                                 | <i>Homo<br/>sapiens</i> |
| HUMAN HGNC=10<br>8 UniProtKB=P22303       | ACE<br>S  | Acetylcholinesterase;ACHE;ort<br>holog                                                   | ACETYLCHOLINESTERASE<br>(PTHR11559:SF393)                                                  | lipase(PC00143);serine protease(PC00203)                        | <i>Homo<br/>sapiens</i> |
| HUMAN HGNC=23<br>409 UniProtKB=Q6U<br>WR7 | ENP<br>P6 | Ectonucleotide<br>pyrophosphatase/phosphodiesterase<br>family member<br>6;ENPP6;ortholog | ECTONUCLEOTIDE<br>PYROPHOSPHATASE/PHOSPHODIESTERASE<br>FAMILY MEMBER 6<br>(PTHR10151:SF66) | nucleotide<br>phosphatase(PC00173);pyrophosphatase(PC0019<br>6) | <i>Homo<br/>sapiens</i> |

|                                    |       |                                                                         |                                                                         |                                                                                                                                           |                     |
|------------------------------------|-------|-------------------------------------------------------------------------|-------------------------------------------------------------------------|-------------------------------------------------------------------------------------------------------------------------------------------|---------------------|
| HUMAN HGNC=4908 UniProtKB=Q6N VY1  | HIBCH | 3-hydroxyisobutyryl-CoA hydrolase, mitochondrial;HIBCH;ortholog         | 3-HYDROXYISOBUTYRYL-COA HYDROLASE, MITOCHONDRIAL (PTHR43176:SF13)       | acetyltransferase(PC00038);acyltransferase(PC00042);dehydrogenase(PC00092);epimerase/racemase(PC00096);hydratase(PC00120);ligase(PC00142) | <i>Homo sapiens</i> |
| HUMAN HGNC=6071 UniProtKB=P4944 1  | IPP   | Inositol polyphosphate 1-phosphatase;INPP1;ortholog                     | INOSITOL POLYPHOSPHATE 1-PHOSPHATASE (PTHR43028:SF3)                    | phosphatase(PC00181)                                                                                                                      | <i>Homo sapiens</i> |
| HUMAN HGNC=3363 UniProtKB=P4996 1  | ENTP1 | Ectonucleoside triphosphate diphosphohydrolase 1;ENTPD1;ortholog        | ECTONUCLEOSIDE TRIPHOSPHATE DIPHOSPHOHYDROLASE 1 (PTHR11782:SF32)       | lyase(PC00144);nucleotide phosphatase(PC00173)                                                                                            | <i>Homo sapiens</i> |
| HUMAN HGNC=17904 UniProtKB=Q9N RR4 | RNC   | Ribonuclease 3;DROSHA;ortholog                                          | RIBONUCLEASE 3 (PTHR11207:SF0)                                          | endoribonuclease(PC00094)                                                                                                                 | <i>Homo sapiens</i> |
| HUMAN HGNC=25792 UniProtKB=Q9B Q65 | USB1  | U6 snRNA phosphodiesterase;USB1;ortholog                                | U6 SNRNA PHOSPHODIESTERASE (PTHR13522:SF3)                              |                                                                                                                                           | <i>Homo sapiens</i> |
| HUMAN HGNC=8781 UniProtKB=Q0734 3  | PDE4B | cAMP-specific 3',5'-cyclic phosphodiesterase 4B;PDE4B;ortholog          | CAMP-SPECIFIC 3',5'-CYCLIC PHOSPHODIESTERASE 4B (PTHR11347:SF108)       |                                                                                                                                           | <i>Homo sapiens</i> |
| HUMAN HGNC=15925 UniProtKB=Q9Y 3Z3 | SAMH1 | Deoxynucleoside triphosphate triphosphohydrolase SAMHD1;SAMHD1;ortholog | DEOXYNUCLEOSIDE TRIPHOSPHATE TRIPHOSPHOHYDROLASE SAMHD1 (PTHR11373:SF4) |                                                                                                                                           | <i>Homo sapiens</i> |
| HUMAN HGNC=18718 UniProtKB=Q8W U67 | ABHD3 | Phospholipase ABHD3;ABHD3;ortholog                                      | PHOSPHOLIPASE ABHD3 (PTHR10794:SF50)                                    | serine protease(PC00203)                                                                                                                  | <i>Homo sapiens</i> |
| HUMAN HGNC=1864 UniProtKB=O0074 8  | CES2  | Cocaine esterase;CES2;ortholog                                          | COCAINE ESTERASE (PTHR11559:SF394)                                      | lipase(PC00143);serine protease(PC00203)                                                                                                  | <i>Homo sapiens</i> |

|                                           |           |                                                                         |                                                                           |                                                                  |                     |
|-------------------------------------------|-----------|-------------------------------------------------------------------------|---------------------------------------------------------------------------|------------------------------------------------------------------|---------------------|
| HUMAN HGNC=60<br>50 UniProtKB=P2921<br>8  | IMP<br>A1 | Inositol monophosphatase<br>1;IMP A1;ortholog                           | INOSITOL MONOPHOSPHATASE 1<br>(PTHR20854:SF26)                            | phosphatase(PC00181)                                             | <i>Homo sapiens</i> |
| HUMAN HGNC=25<br>386 UniProtKB=Q6L<br>8Q7 | PDE<br>12 | 2',5'-phosphodiesterase<br>12;PDE12;ortholog                            | 2',5'-PHOSPHODIESTERASE 12<br>(PTHR12121:SF37)                            | exoribonuclease(PC00099)                                         | <i>Homo sapiens</i> |
| HUMAN HGNC=80<br>22 UniProtKB=P4990<br>2  | 5NT<br>C  | Cytosolic purine 5'-<br>nucleotidase;NT5C2;ortholog                     | CYTOSOLIC PURINE 5'-<br>NUCLEOTIDASE (PTHR12103:SF17)                     | nucleotide phosphatase(PC00173)                                  | <i>Homo sapiens</i> |
| HUMAN HGNC=29<br>991 UniProtKB=Q58<br>A45 | PAN<br>3  | PAN2-PAN3 deadenylation<br>complex subunit<br>PAN3;PAN3;ortholog        | PAN2-PAN3 DEADENYLATION<br>COMPLEX SUBUNIT PAN3<br>(PTHR12272:SF11)       |                                                                  | <i>Homo sapiens</i> |
| HUMAN HGNC=29<br>540 UniProtKB=Q9U<br>LX3 | NOB<br>1  | RNA-binding protein<br>NOB1;NOB1;ortholog                               | RNA-BINDING PROTEIN NOB1<br>(PTHR12814:SF2)                               |                                                                  | <i>Homo sapiens</i> |
| HUMAN HGNC=30<br>646 UniProtKB=Q7K<br>ZF4 | SND<br>1  | Staphylococcal nuclease<br>domain-containing protein<br>1;SND1;ortholog | STAPHYLOCOCCAL NUCLEASE<br>DOMAIN-CONTAINING PROTEIN 1<br>(PTHR12302:SF2) | nucleic acid binding(PC00171);transcription<br>cofactor(PC00217) | <i>Homo sapiens</i> |
| HUMAN HGNC=86<br>09 UniProtKB=O9545<br>3  | PAR<br>N  | Poly(A)-specific ribonuclease<br>PARN;PARN;ortholog                     | POLY(A)-SPECIFIC RIBONUCLEASE<br>PARN (PTHR15092:SF26)                    | mRNA polyadenylation factor(PC00146)                             | <i>Homo sapiens</i> |
| HUMAN HGNC=25<br>495 UniProtKB=Q9N<br>W82 | WD<br>R70 | WD repeat-containing protein<br>70;WDR70;ortholog                       | WD REPEAT-CONTAINING PROTEIN<br>70 (PTHR16017:SF0)                        |                                                                  | <i>Homo sapiens</i> |
| HUMAN HGNC=27<br>8 UniProtKB=P35368       | ADA<br>1B | Alpha-1B adrenergic<br>receptor;ADRA1B;ortholog                         | ALPHA-1B ADRENERGIC RECEPTOR<br>(PTHR24248:SF17)                          | G-protein coupled receptor(PC00021)                              | <i>Homo sapiens</i> |
| HUMAN HGNC=18<br>518 UniProtKB=O757<br>92 | RNH<br>2A | Ribonuclease H2 subunit<br>A;RNASEH2A;ortholog                          | RIBONUCLEASE H2 SUBUNIT A<br>(PTHR10954:SF7)                              | endoribonuclease(PC00094);hydrolase(PC00121)                     | <i>Homo sapiens</i> |

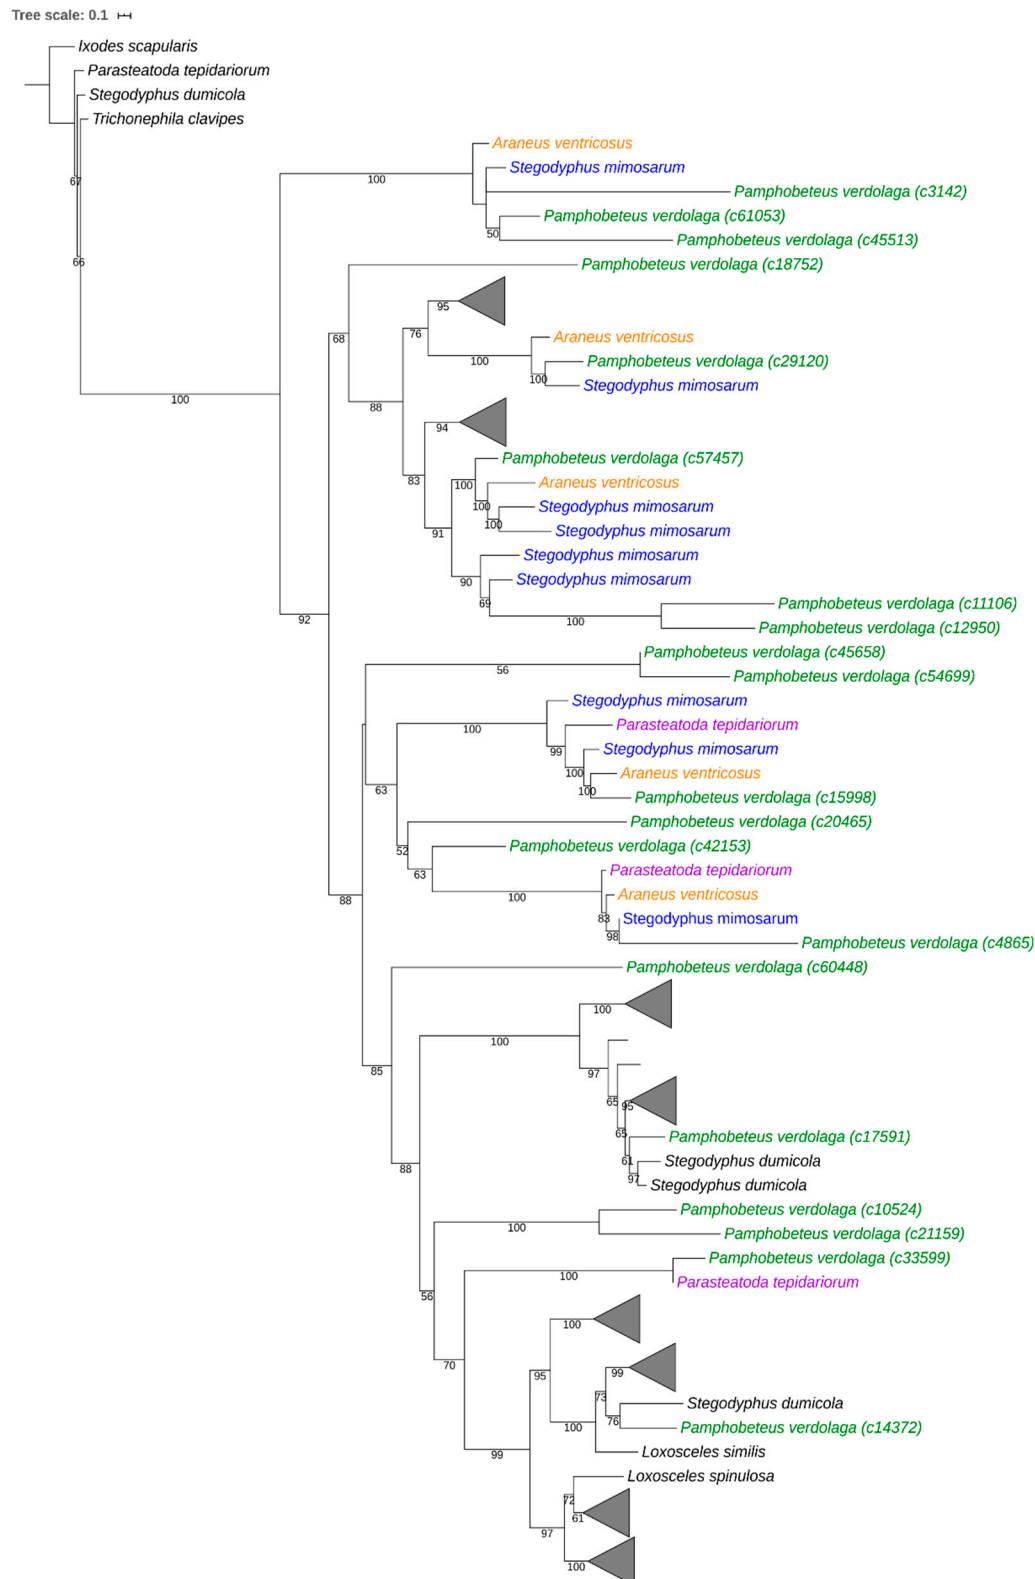

**Figure S1.** Phylogenetic tree of phospholipase A2. The tree includes sequences of phospholipase A2 reported for different spider families. *P. verdolaga* sequences (green) are orthologous with different species, grouped with good branch supports (> 50%), multiples duplication event underwent during the evolution of phospholipase A2 in *P. verdolaga*. The triangle represents collapsed sequences from other species used to build the tree. Phospholipase A2 from *Ixodes scapularis* was used as outgroup.

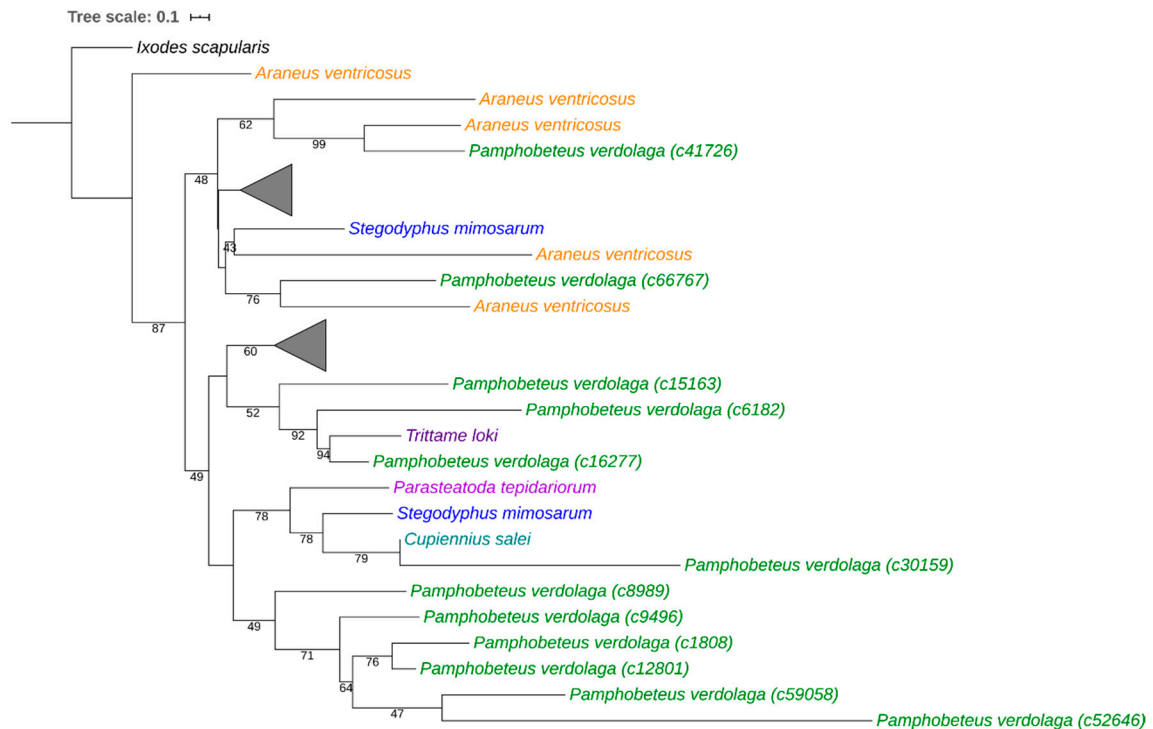

**Figure S2.** Phylogenetic tree of Kunitz-like protein family. The tree includes the Kunitz reported in data bases for different spider families. The Phylogenetic tree show that *P. verdolaga* sequences (green) are orthologous with different species, grouped with good branch supports (> 50%). The triangle represents collapsed sequences from other species used to build the tree. Kunitz from *Ixodes scapularis* was used as outgroup.

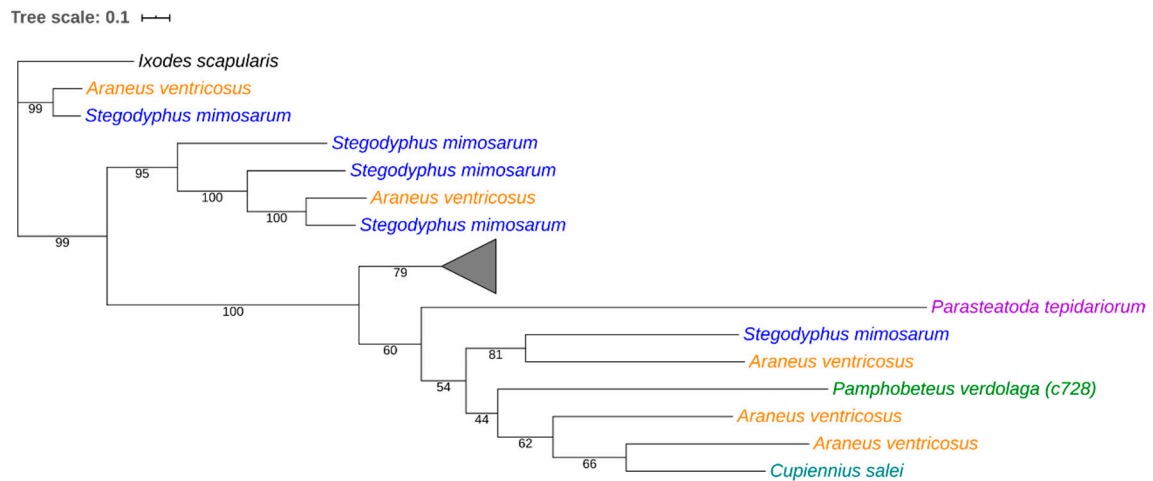

**Figure S3.** Phylogenetic tree of the metalloproteinase. The tree includes the metalloproteinase reported in data bases for different spider families. The Phylogenetic tree show that *P. verdolaga* sequence (green) is orthologous with the sequences reported for *Araneus ventricosus* with a branch support of 44%. The triangle represents collapsed sequences from other species used to build the tree. Metalloproteinase sequence from *Ixodes scapularis* was used as outgroup.

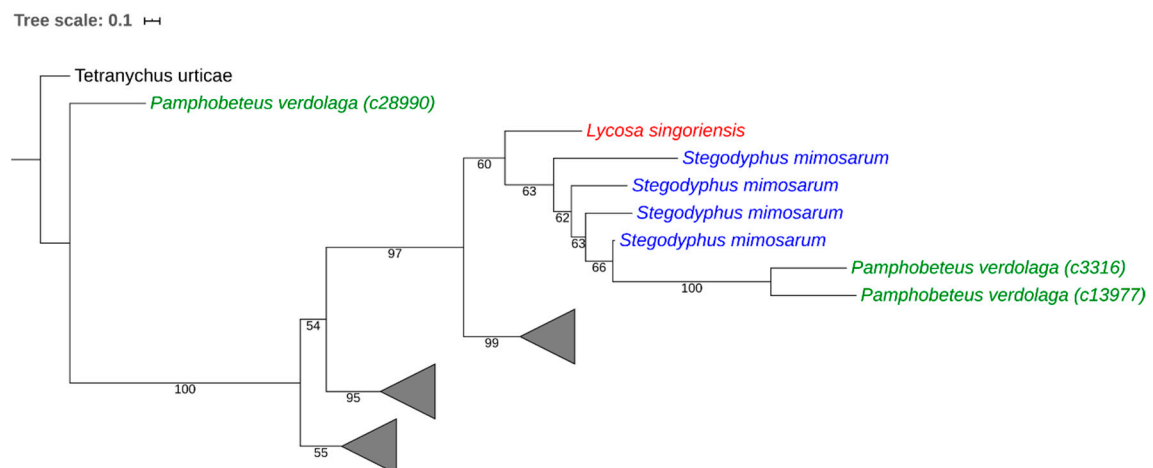

**Figure S4.** Phylogenetic tree of Lycotoxin-like protein. The tree includes the Lycotoxin-like proteins reported in data bases for different spider families. The Phylogenetic tree supports (branch support 100%) that *P. verdolaga* sequence c28990 is a basal protein that belong to the Lycotoxin-like family in spiders and multiples duplication events allow the diversification of the protein in different spider species. The triangle represents collapsed sequences from other species used to build the tree. Lycotoxin from *Tetranychus urticae* was used as outgroup.
