# Supplementary material for: Analysis of High Molecular Mass Compounds from the Spider Pamphobeteus verdolaga Venom Gland. A Transcriptomic and MS ID Approach
Source: MDPI journal article supplement (doi:10.3390/toxins13070453), 2021-06-29
Supplement: s1 [file s1]

# Supplementary Materials: Analysis of High Molecular Mass Compounds from the Spider *Pamphobeteus verdolaga* Venom Gland. A Transcriptomic and MS ID Approach

Sebastian Estrada-Gomez, Leidy Johana Vargas-Muñoz, Cesar Segura Latorre, Monica Maria Saldarriaga-Cordoba and Claudia Marcela Arenas-Gómez

**Supplementary material 3:** Prediction of Cys-Cys formation of putative protein ORFs corresponding to phospholipases A<sub>2</sub>, phospholipases D, phospholipases B, kunitz-type, hyaluronidases, lycotoxins toxins, CRISP proteins, Hephaestin-like protein and venom metalloproteinase. Residues highlighted in grey indicate the signal peptide, while magenta blue highlighted residues, indicates the propeptide according to Spider|ProHMM from the arachnoserver. Residues highlighted in yellow shows cysteines potentially forming disulfide bridges.

## PhospholipaseA<sub>2</sub>-1-Pverdolaga:

XLGTGKSPVVAVETIDVFRPDSLWDA<sup>C</sup>KMVALGVSAIGQLLIDQATQTDGRVIGRAQAM<sup>C</sup>SM  
LNIPYYRLNPQLTENVGLD<sup>T</sup>TDNKT<sup>L</sup>VKMLWETTAYMHSMRQELEQL<sup>C</sup>NNYEDSGLD

Sequence inputSeq Length 119 residues

Cysteines in this sequence: 3

**Disulfide Connectivity prediction**

**Step 1:** Running PSI-BLAST with input sequence; click [here](#) to see the output

**Step 2:** Predicting secondary structure using PSIPRED; click [here](#) to see the output

**Step 3:** Disulfide Oxidation State Prediction; click [here](#) to see the results

Warning! The number of predicted half-cystines is lower than 2.

**Step 4:** Disulfide Bonds Prediction using a trained Neural Network

**Disulfide bond scores**

| Cysteine sequence position | Distance | Bond                    | Score   |
|----------------------------|----------|-------------------------|---------|
| 27 - 60                    | 33       | SLWDACKMVAL-RAQAMCSMLNI | 0.01102 |
| 27 - 110                   | 83       | SLWDACKMVAL-ELEQLCNNYED | 0.75862 |
| 60 - 110                   | 50       | RAQAMCSMLNI-ELEQLCNNYED | 0.89632 |

**Step 5:** Weighted matching

**Predicted bonds**

|          |                           |
|----------|---------------------------|
| 60 - 110 | RAQAMCSMLNI - ELEQLCNNYED |
|----------|---------------------------|

**Predicted connectivity**

2-3

[Introduction](#)
[Instructions](#)
[References](#)
[About](#)
[Help!](#)
[Contacts](#)

PhospholipaseA<sub>2</sub>-Pverdolaga:

MAAESVADDVLRCCVNLSEFRDFYCPYDIPSVEGPPTPLEFARNWVSPNKPVIFRNAVKHWP  
ALKKWTVSYLK

Sequence **inputSeq** Length 74 residues

Cysteines in this sequence: 3

### Disulfide Connectivity prediction

**Step 1:** Running [PSI-BLAST](#) with input sequence; click [here](#) to see the output

**Step 2:** Predicting secondary structure using [PSIPRED](#); click [here](#) to see the output

**Step 3:** Disulfide Oxidation State Prediction; click [here](#) to see the results

**Warning!** The number of predicted half-cystines is lower than 2.

**Step 4:** Disulfide Bonds Prediction using a trained Neural Network

### Disulfide bond scores

| Cysteine sequence position | Distance | Bond                    | Score   |
|----------------------------|----------|-------------------------|---------|
| 13 - 14                    | 1        | DDVLRCCVNLS-DVLRCCVNLS  | 0.01037 |
| 13 - 26                    | 13       | DDVLRCCVNLS-FRDFYCPYDIP | 0.03657 |
| 14 - 26                    | 12       | DVLRCCVNLS-FRDFYCPYDIP  | 0.82076 |

**Step 5:** Weighted matching

### Predicted bonds

|         |                          |
|---------|--------------------------|
| 14 - 26 | DVLRCCVNLS - FRDFYCPYDIP |
|---------|--------------------------|

### Predicted connectivity

2-3

[Introduction](#)
[Instructions](#)
[References](#)
[About](#)
[Help!](#)
[Contacts](#)

© Boston College

**PhospholipaseA<sub>2</sub>-3-Pverdolaga:**

MLSLSTHSRFVVSFTLLSLLISSTTSYRIPKRSVRPSPVIFVPGDGGSQLQAKLNKPETVHYYCN  
 KKTDYYFDLWLNLELLVPYVLD CWIDNMRLIYDNVTRKTTNAPGVDIRVPGFGNTSTVEWLD  
 PSQIAPSA YFVRIVQGLVDEGYTRGVDLKGAPYDYRKAPNEMANYYKNVKQMTEEMYFKLN  
 KTRITYV CHSMGCPVMLYFFNRQTQDWK DTHVKALITLGGAWGGAVKAMKAFASGENLGV  
 YVINHLLLRKEQRTSPSLAYMTPSDTFWKKDEILVVTEKQNYTIGNYYDFFQDIRFPVGVWEMW  
 KDTYNLTRDLIPPGVEVH CMHGVNVSTIERLVYKHLEFPDSNPTLIQGDGDGTVNLRSLGCL  
 RWKGNQKQKVVKPLNNVDHMGVLYDDDDVIQYIKQVVSS

Sequence inputSeq Length 415 residues

Cysteines in this sequence: 6

**Disulfide Connectivity prediction**

**Step 1:** Running [PSI-BLAST](#) with input sequence; click [here](#) to see the output

**Step 2:** Predicting secondary structure using [PSIPRED](#); click [here](#) to see the output

**Step 3:** Disulfide Oxidation State Prediction; click [here](#) to see the results

Warning! The number of predicted half-cystines is lower than 2.

**Step 4:** Disulfide Bonds Prediction using a trained Neural Network

**Step 5: Weighted matching****Predicted bonds**

|           |                           |
|-----------|---------------------------|
| 65 - 89   | TVHYYCNKKTD - PYVLDCWIDNM |
| 197 - 202 | RITYVCHSMGC - CHSMGCPVMLY |
| 331 - 374 | GVEVHCMHGVN - RSLEGCLRWKG |

**Predicted connectivity**

1-2, 3-4, 5-6

[Introduction](#)

[Instructions](#)

[References](#)

[About](#)

[Help!](#)

[Contacts](#)

© Boston College

**PhospholipaseA<sub>2</sub>-4-Pverdolaga:**

XFVNNICTSSVLDTRKGRAGLILNPLRGLSLIPCFNFSPFSPTSPSDDMLFKGLTEAVPTQSKTLY  
 LVDGGLTFNLPFPLLRPQRGIDVYLAADFSSRDADH

Sequence inputSeq Length 103 residues

Cysteines in this sequence: 2

**Disulfide Connectivity prediction**

**Step 1:** Running [PSI-BLAST](#) with input sequence; click [here](#) to see the output

**Step 2:** Predicting secondary structure using [PSIPRED](#); click [here](#) to see the output

**Step 3:** Disulfide Oxidation State Prediction; click [here](#) to see the results

Warning! The number of predicted half-cystines is lower than 2.

**Step 4:** Disulfide Bonds Prediction using a trained Neural Network

**Disulfide bond scores**

| Cysteine sequence position | Distance | Bond                    | Score   |
|----------------------------|----------|-------------------------|---------|
| 7 - 34                     | 27       | FVNNICTSSVL-LSLIPCFNFSP | 0.15031 |

**Step 5:** Weighted matching

**Predicted bonds**

|        |                           |
|--------|---------------------------|
| 7 - 34 | FVNNICTSSVL - LSLIPCFNFSP |
|--------|---------------------------|

**Predicted connectivity**

1-2

[Introduction](#)
[Instructions](#)
[References](#)
[About](#)
[Help!](#)
[Contacts](#)

© Boston College

**PhospholipaseA<sub>2</sub>-5-Pverdolaga:**

XPSQSKKCTCSFDCSGGDSMEIVPQNCRVLC LDGGGIRGLVLIQLLDQLEKVLGIPVNLCFDWI  
 AGTSTGGVLALLLAQGKSVKECRCLYFRLKDRVFVGMRPYDAEPLEKILQKELGYETMMSDV  
 TGARVMVTATKSDRHPAELHVFRNYDSPMEILTQEDLDPFHNTPLPKPSEQLVWKVARATGS  
 APTYFRAFGAFLDGGLISNNPTLDALTEIHQCNQAYRVTHQEEKIKEIDX

Sequence inputSeq Length 239 residues

Cysteines in this sequence: 9

### Disulfide Connectivity prediction

**Step 1:** Running PSI-BLAST with input sequence; click [here](#) to see the output

**Step 2:** Predicting secondary structure using PSIPRED; click [here](#) to see the output

**Step 3:** Disulfide Oxidation State Prediction; click [here](#) to see the results

**Step 4:** Disulfide Bonds Prediction using a trained Neural Network

### Step 5: Weighted matching

#### Predicted bonds

|         |                           |
|---------|---------------------------|
| 8 - 10  | SQSKKCTCSFD - SKKCTCSFDCS |
| 14 - 27 | TCSFDCSGGDS - IVPQNCRVLCL |
| 31 - 88 | NCRVLCLDGGG - VKECRCLYFRL |
| 60 - 86 | IPVNLCFDWIA - KSVKECRCLYF |

#### Predicted connectivity

1-2, 3-4, 5-8, 6-7

[Introduction](#)

[Instructions](#)

[References](#)

[About](#)

[Help!](#)

[Contacts](#)

© Boston College

**PhospholipaseA<sub>2</sub>-6-Pverdolaga:**

MTICTSNSKYLFLVQLWIILPFLAFNVRKWANNSSDDCNYYDLQVENDGPVTLDPITFYAVLE  
 CASAEHYVYIFQDNAVPPHRIQVDGSTGANVSFVYNANIYRPGVYILKVSFSGMWSPVLVG  
 IASTSSTFVISEYIPGSLNISDIKVRNQGGSLYISSGSVTNLTINLHYPSSVYPLLETYSWNVEKDQ  
 FITVDPFIYNFTQPGTYRISVSAVARVPVYNVLAVPTQIMKYKWGYFNTVATVKDSMTAVNLT  
 GNTYLKHGQLNLDVSCGTGSGPFECWKIFQPFENVTDLTCPSPIVTTKCSFPIIYFQESGNYQ  
 VAILVDNYITSIQRNIEVHVYDVSLLKPLSTVILPLVCAVLAIITIGIVIHIRENQQFDIETADFD  
 FLQSDVIVVETFWKMYHSILQVLLRREVQSNYYLRIVSPDASSSHYGSVPXIGAVRRIIVTV  
 WMIGRCHHVSKSLTAEFLYWFLRLRFQHTVKEKLFDSNPASTWNWPHFRNCNYLLVL

Sequence inputSeq Length 516 residues

Cysteines in this sequence: 11

**Disulfide Connectivity prediction**

**Step 1:** Running PSI-BLAST with input sequence; click [here](#) to see the output

**Step 2:** Predicting secondary structure using PSIPRED; click [here](#) to see the output

**Step 3:** Disulfide Oxidation State Prediction; click [here](#) to see the results

**Step 4:** Disulfide Bonds Prediction using a trained Neural Network

**Step 5: Weighted matching****Predicted bonds**

|           |                            |
|-----------|----------------------------|
| 4 - 39    | XXMTICTSNSK - NNSDDCNYYDLQ |
| 65 - 309  | YAVLECASAE - IVTTKCSFPII   |
| 276 - 464 | NLDVSCGTGSGP - WMIGRCHHVSK |
| 300 - 362 | VTDLTCPSPIV - ILPLVCAVLAI  |
| 417 - 509 | ILQVLCLRREV - PHFRNCNYLLV  |

**Predicted connectivity**

1-2, 3-7, 4-10, 6-8, 9-11

[Introduction](#)

[Instructions](#)

[References](#)

[About](#)

[Help!](#)

[Contacts](#)

© Boston College

**PhospholipaseA<sub>2</sub>-7-Pverdolaga:**

MTLGAPNIRRKIKRDLLDLADMFEELTQLDPTEYIPYGNWCGYGGDGEILDRIDRCCEIHDRCYGKVSENVCSNEQVHIINYQWNRENDTITCDGNTSKCEMEACMCDRDVVLCHKHNGDYSH  
 EVRYVDSTKPKTSGVPQWSSMNKDCTKRSDGSEIPLMGRMGNMMSLIFX

Sequence inputSeq Length 173 residues

Cysteines in this sequence: 11

**Disulfide Connectivity prediction**

**Step 1:** Running [PSI-BLAST](#) with input sequence; click [here](#) to see the output

**Step 2:** Predicting secondary structure using [PSIPRED](#); click [here](#) to see the output

**Step 3:** Disulfide Oxidation State Prediction; click [here](#) to see the results

**Step 4:** Disulfide Bonds Prediction using a trained Neural Network

**Step 5:** Weighted matching

**Predicted bonds**

|           |                           |
|-----------|---------------------------|
| 56 - 72   | DRIDRCCEIHD - VSENVCSNEQV |
| 57 - 100  | RIDRCCEIHDR - GNTSKCEMEAC |
| 63 - 93   | EIHDRCYGKVS - NDTITCDGNTS |
| 105 - 149 | CEMEACMCDRD - SMNKDCTKRSD |
| 107 - 114 | MEACMCDRDV - RDVVLCHKHN   |

**Predicted connectivity**

2-5, 3-7, 4-6, 8-11, 9-10

[Introduction](#)
[Instructions](#)
[References](#)
[About](#)
[Help!](#)
[Contacts](#)

© Boston College



**PhospholipaseA<sub>2</sub>-8-Pverdolaga:**

MGFLLTAALT FILLAGYSPFSAEKPLQIRRNKRS LFDLNDMIKQLTGRSGLDFIGYGN YCGFGGE  
 GKPVDIDR CCKMHDICYDFAQNDDCAEDPNVYKIKYGWQKSFQVQCSFSQSKCMKVVC  
 CIDVRFAKCLKNYINEYNNSNKHEKDLQELLEEVQQMSK

Sequence inputSeq Length 166 residues

Cysteines in this sequence: 10

Disulfide Connectivity prediction

Step 1: Running PSI-BLAST with input sequence; click [here](#) to see the output

Step 2: Predicting secondary structure using PSIPRED; click [here](#) to see the output

Step 3: Disulfide Oxidation State Prediction; click [here](#) to see the results

Step 4: Disulfide Bonds Prediction using a trained Neural Network

Step 5: Weighted matching

| Predicted bonds |                           |
|-----------------|---------------------------|
| 60 - 126        | GYGNYCGFGGE - CMKVVCICDVR |
| 75 - 91         | DDIDRCCKMHD - AQNDDCAEDPN |
| 76 - 121        | DIDRCCKMHDI - FSQSKCMKVVC |
| 82 - 114        | KMHDICYDFAQ - SFGVQCSFSQS |
| 128 - 135       | KVVCICDVRFA - VRFAKCLKNYI |

Predicted connectivity

1-8, 2-5, 3-7, 4-6, 9-10

Introduction
Instructions
References
About
Help!
Contacts

© Boston College

## Mature protein disulfide pattern

|                                  |                              |
|----------------------------------|------------------------------|
| <b>Step 5: Weighted matching</b> |                              |
| <b>Predicted bonds</b>           |                              |
| 11 - 77                          | GYGNYCGFGGE - CMKVVCICDVR    |
| 26 - 42                          | DDIDRCCKMHD - AQNDDCAEDPN    |
| 27 - 72                          | DIDRCCKMHDI - FSQSKCMKVVC    |
| 33 - 65                          | KMHDICYDFAQ - SFGVQCSFSQS    |
| 79 - 86                          | KVVCICDVRFA - VRFAKCLKNYI    |
| <b>Predicted connectivity</b>    |                              |
| 1-8, 2-5, 3-7, 4-6, 9-10         |                              |
| <a href="#">Introduction</a>     | <a href="#">Instructions</a> |
| <a href="#">References</a>       | <a href="#">About</a>        |
| <a href="#">Help!</a>            | <a href="#">Contacts</a>     |
| © Boston College                 |                              |

**PhospholipaseA<sub>2</sub>-9-Pverdolaga:**

MERKYL<sup>Y</sup>CAVVLGSFIITYPQSLFAGVKNVLDSVNAIVEEVSLGLRSLSAGLDFVDQFVQTAG  
 SEECLFH<sup>C</sup>PSGKKLVN<sup>Q</sup>KYKPVPSG<sup>C</sup>GAYGVTLSVKNSPQKEFTECC<sup>N</sup>YHDI<sup>C</sup>YGTCLSKKEI  
<sup>C</sup>DEKFDK<sup>C</sup>LNKA<sup>C</sup>AKQAKEIGEKKFGD<sup>C</sup>KMAAKVFYAGTVALG<sup>C</sup>KAFLDAQAEA<sup>C</sup>ICPEA  
 WSVRL<sup>C</sup>VRSTRQIC<sup>V</sup>VYGEDAIAPRTA

Sequence inputSeq Length 216 residues

Cysteines in this sequence: 17

**Disulfide Connectivity prediction**

**Step 1:** Running PSI-BLAST with input sequence; click [here](#) to see the output

**Step 2:** Predicting secondary structure using PSIPRED; click [here](#) to see the output

**Step 3:** Disulfide Oxidation State Prediction; click [here](#) to see the results

**Step 4:** Disulfide Bonds Prediction using a trained Neural Network

**Step 5: Weighted matching****Predicted bonds**

|           |                            |
|-----------|----------------------------|
| 9 - 68    | KYLLYCAVVLG - AGSEECLEFHCP |
| 72 - 172  | ECLFHCPSGKK - TVALGCKAFLD  |
| 91 - 111  | PVPSGCGAYGV - KEFTECCNYHD  |
| 112 - 202 | EFTECCNYHDI - STRQICVVYGE  |
| 118 - 183 | NYHDICYGTCL - AQAEACICPEA  |
| 122 - 141 | ICYGTCLSKKE - CLNKACAKQAK  |
| 136 - 156 | EKFDKCLNKAC - KKFGDCKMAAK  |
| 185 - 194 | AEACICPEAWS - WSVRLCVRSTR  |

**Predicted connectivity**

1-2, 3-13, 4-5, 6-17, 7-14, 8-11, 10-12, 15-16

[Introduction](#)

[Instructions](#)

[References](#)

[About](#)

[Help!](#)

[Contacts](#)

© Boston College

## Mature protein disulfide pattern

Sequence **inputSeq** Length **189** residues

Cysteines in this sequence: **16**

### Disulfide Connectivity prediction

**Step 1:** Running [PSI-BLAST](#) with input sequence; click [here](#) to see the output

**Step 2:** Predicting secondary structure using [PSIPRED](#); click [here](#) to see the output

**Step 3:** Disulfide Oxidation State Prediction; click [here](#) to see the results

**Step 4:** Disulfide Bonds Prediction using a trained Neural Network

**Step 5:** Weighted matching

### Predicted bonds

|           |                            |
|-----------|----------------------------|
| 42 - 103  | AGSEECLEFHCP - SKKEICDEKFD |
| 46 - 146  | ECLFHCPGSGKK - TVALGCKAFLD |
| 65 - 85   | PVPSGCGAYGV - KEFTECCNYHD  |
| 86 - 176  | EFTECCNYHDI - STRQICVVYGE  |
| 92 - 157  | NYHDICYGTCL - AQAEACICPEA  |
| 96 - 115  | ICYGTCLSKKE - CLNKACAKQAK  |
| 110 - 130 | EKFDKCLNKAC - KKFGDCKMAAK  |
| 159 - 168 | AEACICPEAWS - WSVRLCVRSTR  |

### Predicted connectivity

1-8, 2-12, 3-4, 5-16, 6-13, 7-10, 9-11, 14-15

[Introduction](#)

[Instructions](#)

[References](#)

[About](#)

[Help!](#)

[Contacts](#)

© Boston College

**PhospholipaseA<sub>2</sub>-10-Pverdolaga:**

FGYIMVLKNGSLNDSEEVATGENLTMIKILDGNGYLKDADIRCTWSIDMERFDLEGTSINY  
 TYYDPGMSYIAVAVFATLPSSKTVFGLFTKELVVKVPVSDITISGNPFIHHNEVLNLNVSWTGTP  
 PFEYCWDIINSNETVEGNFTCMVIVTYDTSFPVTRYFQKNGTYTMAIHVSNDVKLVKRNMEIIV  
 FSVLPKSQLSTVIPIVCSLLTLVIAIGIAYYRQRRQLIVEVASFDFHDNSDSYRERTFFEQLWDS  
 FRCRGCCSPSLSVRSDCLPSENEPLLT

Sequence inputSeq Length 288 residues

Cysteines in this sequence: 8

**Disulfide Connectivity prediction**

**Step 1:** Running [PSI-BLAST](#) with input sequence; click [here](#) to see the output

**Step 2:** Predicting secondary structure using [PSIPRED](#); click [here](#) to see the output

**Step 3:** Disulfide Oxidation State Prediction; click [here](#) to see the results

**Step 4:** Disulfide Bonds Prediction using a trained Neural Network

**Step 5:** Weighted matching

**Predicted bonds**

|           |                           |
|-----------|---------------------------|
| 45 - 277  | DADIRCTWSID - SVRSDCLPSEN |
| 133 - 263 | PPFEYCWDIIN - WDSFRCRGCCS |
| 149 - 266 | EGNFTCMVIVT - FRCRGCCSPSL |
| 210 - 267 | IIPIVCSLLTL - RCRGCCSPSL  |

**Predicted connectivity**

1-8, 2-5, 3-6, 4-7

[Introduction](#)
[Instructions](#)
[References](#)
[About](#)
[Help!](#)
[Contacts](#)

© Boston College

**PhospholipaseA<sub>2</sub>-11-Pverdolaga:**

XGDLVDTPDPYVVLKVPGPSNGKKRTKYFNNTINPTWKETFTFVLDPEKNYELEVILMDANYT  
 IDQRLGX

No disulfide bonds are possible for this sequence, the prediction will not be attempted

[Clote's structural bioinformatics Lab - Author's homepage](#)

**PhospholipaseA<sub>2</sub>-12-Pverdolaga:**

MSIIRDILGGFRKVSQAQVDDPFRVLEVNVEDYLTVDVVCREDCLVLYKANDRGVMKLEIVVQL  
 HINHSSNKNKVVSLHRSEDETNCQILFSQMCQKIPILIDYVPEVGLSKMALQNVSQVIRENLA  
 WNAAHIAAHFGYTD CFKYKTMASEISEPCEGTLQTPHVAIKASQFPSVVALVDVMDIV  
 DCNNGDSIFHYAATTTKEIIQALSVKPCVPVINMLNHDGHTPLHLACMADKPECVKELLRAGA  
 DVNMAISIVDVDEVDRAQAAMPKLLSDVMHHTHAQRLYMDDMKTGGTPLHWSKTSELTAI  
 LIEYGCHIDAKNFEGNTALHVMVLNRISC AVTLLSHGANVDIQQADGNTPLHLAVKSGDIY  
 LVYAFVAFGANVNAINNKGETPRHILATEKRPGFEEMLYALHIVGAERCQRRTPWC KDGC EP  
 GQHFNGIPSENPPVLNKTTLDDLLGAT

Sequence inputSeq Length 464 residues

Cysteines in this sequence: 15

**Disulfide Connectivity prediction**

**Step 1:** Running [PSI-BLAST](#) with input sequence; click [here](#) to see the output

**Step 2:** Predicting secondary structure using [PSIPRED](#); click [here](#) to see the output

**Step 3:** Disulfide Oxidation State Prediction; click [here](#) to see the results

Warning! The number of predicted half-cystines is lower than 2.

**Step 4:** Disulfide Bonds Prediction using a trained Neural Network

**Step 5: Weighted matching****Predicted bonds**

|           |                            |
|-----------|----------------------------|
| 39 - 341  | TYDVVCREDC - RNRISCAVTLL   |
| 43 - 429  | VCREDCLVLYK - RRTPWCKDGCE  |
| 87 - 235  | EDETNCQILFS - PLHLACMADKP  |
| 95 - 422  | LFSQMCQKIPI - VGAERCQRRTP  |
| 142 - 433 | FGYTDCFKYKT - WCKDGCPEPGQH |
| 191 - 317 | MDIVDCNGDSI - LIEYGCHIDAK  |
| 216 - 242 | LSVKPCVPVIN - ADKPECVKELL  |

**Predicted connectivity**

1-12, 2-14, 3-9, 4-13, 5-15, 7-11, 8-10

[Introduction](#)

[Instructions](#)

[References](#)

[About](#)

[Help!](#)

[Contacts](#)

© Boston College

**PhospholipaseA<sub>2</sub>-13-Pverdolaga:**

XRLHELDEPADAELIQNSGLPAKYPSEFKMMLELINNC<sup>1</sup>SQLELPVHKVASSIATNQSEPNNTIS  
 KWSPWALWNGIVPGTKW<sup>2</sup>CGVGDIAS<sup>3</sup>TEELGSQAVVDS<sup>4</sup>CCRAHDH<sup>5</sup>CPVKLKAFRVGYGMI  
 NLSFYTKSH<sup>6</sup>CD<sup>7</sup>CDRLFHS<sup>8</sup>CLKQTKNKLANAVGNFYFN<sup>9</sup>FIRVQ<sup>10</sup>CLKERKVYV<sup>11</sup>VENRTDVDGL  
 NEC<sup>12</sup>IRWSVDPDSRKX

Sequence inputSeq Length 202 residues

Cysteines in this sequence: 11

**Disulfide Connectivity prediction**

**Step 1:** Running PSI-BLAST with input sequence; click [here](#) to see the output

**Step 2:** Predicting secondary structure using PSIPRED; click [here](#) to see the output

**Step 3:** Disulfide Oxidation State Prediction; click [here](#) to see the results

**Step 4:** Disulfide Bonds Prediction using a trained Neural Network

**Step 5: Weighted matching****Predicted bonds**

|           |                            |
|-----------|----------------------------|
| 38 - 110  | ELINNCSQLEL - RAHDHCPVKLK  |
| 82 - 104  | PGTKWCGVGDI - VVDSCCRAHDH  |
| 103 - 134 | AVVDSCCRAHD - YTKSHCDCDRL  |
| 136 - 143 | KSHCDCDRLFH - RLFHSCCLKQTK |
| 176 - 189 | RKVYVCVENRT - DGLNECIRWSV  |

**Predicted connectivity**

1-5, 2-4, 3-6, 7-8, 10-11

[Introduction](#)

[Instructions](#)

[References](#)

[About](#)

[Help!](#)

[Contacts](#)

© Boston College

**PhospholipaseA<sub>2</sub>-14-Pverdolaga:**

X C R A H D L C D D T L A P G E T K H N L T N R S T F T K L N C Q C D Q E F Y E C L Q K V D S L V S N S I G N L Y F N V L R  
R G C Y E Y D H P L T K C K S Y R T

Sequence inputSeq Length 81 residues

Cysteines in this sequence: 7

**Disulfide Connectivity prediction**

**Step 1:** Running [PSI-BLAST](#) with input sequence; click [here](#) to see the output

**Step 2:** Predicting secondary structure using [PSIPRED](#); click [here](#) to see the output

**Step 3:** Disulfide Oxidation State Prediction; click [here](#) to see the results

**Warning!** The number of predicted half-cystines is lower than 2.

**Step 4:** Disulfide Bonds Prediction using a trained Neural Network

**Step 5:** Weighted matching

**Predicted bonds**

|         |                           |
|---------|---------------------------|
| 2 - 32  | XXXXXCRAHDL - FTKLNCQCDQE |
| 8 - 65  | RAHDLCDDTLA - VLRRGCYEYDH |
| 34 - 41 | KLNCQCDQEFY - QEFYECLQKVD |

**Predicted connectivity**

1-3, 2-6, 4-5

[Introduction](#)

[Instructions](#)

[References](#)

[About](#)

[Help!](#)

[Contacts](#)

© Boston College



**PhospholipaseA<sub>2</sub>-15-Pverdolaga:**

MPRSQNAFSRNSSLYSSLYTRSVNISKEKRKLLHLHKTYCTSKRSSDLNVSKPSSDKIPGNSIFSTIW  
 KSVVVASSMLRPGLSVTPPKSIPIREFISKVGNVSTEEKYSKLLQPYLKLRSVNSEENVROTTEKS  
 RTCSKPGVVSQAGNVISGEKESVFEQAAAEWITSANLQEKQENLSNQKEKSENLPKVLISKAS  
 LASRSRFLVRSLSACASSQMLRLEEVCKHLLQHPQEKGTLVKEGLIRVALRLRRKSSNTDIQT  
 QACVALTLLGYHEPPGGQGIRILSIDGGGTRGLMAIEILRQLQARTGKTVHEMFDYICGVSSGA  
 ILTFLGGLRLSPDECESLYRELSLEVFKASGIWGAGRLMWYHAYYDTSMWVDVLRKTFGDK  
 MLIDSVKEKSSPKLAAISAVMNLPALRAVFRNYDYPIRVQSQYIGSANYRMWEAIRASGAAP  
 GYFEFHLNHLHLDQGGIMINNPTALAIHEARLLWPSDYIQCVFSLGSGRFTPATNTAFTSTTL  
 KTKVQKVIDSATDTEAVHISMNDLLSPGTYFRNPYLTEFLHLDENRPDKLHQLKMDAQMYL  
 RRNEHKLEQSIKVLTRPRSTLKKINDWIQLQKTLL

Sequence inputSeq Length 614 residues

Cysteines in this sequence: 9

**Disulfide Connectivity prediction****Step 1:** Running [PSI-BLAST](#) with input sequence; click [here](#) to see the output**Step 2:** Predicting secondary structure using [PSIPRED](#); click [here](#) to see the output**Step 3:** Disulfide Oxidation State Prediction; click [here](#) to see the results**Warning!** The number of predicted half-cystines is lower than 2.**Step 4:** Disulfide Bonds Prediction using a trained Neural Network**Step 5:** Weighted matching**Predicted bonds**

|           |                           |
|-----------|---------------------------|
| 39 - 211  | LHKTYCTSKRS - VRSLSCASSCS |
| 136 - 265 | EKSRTCSPKGV - IQTQACVALTL |
| 215 - 493 | SCASSCSSQML - SDYIQCVFSLG |
| 226 - 342 | RLEEVCKHLLQ - LSPDECESLYR |

**Predicted connectivity**

1-3, 2-6, 4-9, 5-8

[Introduction](#)[Instructions](#)[References](#)[About](#)[Help!](#)[Contacts](#)

© Boston College

**PhospholipaseA<sub>2</sub>-16-Pverdolaga:**

MAEEYHLMCSILAHGSDIRSVTTSYVPLGGIVTGSRDKTIKLWRPTGTTFTTEEHCMRGASHFIS  
 SLCALPPSDQYPDGLILAGSNDCAIYGFSLDSSEPILKLLGHSENVCALVAGNLGTIVSGSWDKT  
 ARVWHGQRVATLSGHTQAVWAVALLPDHALVLTGSADKAVFLWNNGKERKFIGHEDC  
 VRGLTVISDLEFLSCSNDTTVRRWQTSGECLGIYTGHTDYVYDILSSCREYFISCSEDQTVKVV  
 KENVCVQTIKLPKSLWAVTYLYNGDIAVGGSDGSVRVFTKDKSRRASPAAEEARFNEEIVSMN  
 SKNMKQNIQDLELDDVPGPDALLQDGTSDGQTQLCKVGNEVSVFQWSVKEHKWLKLGKVL  
 DALDNRPAGKKTVEGKEYDYVFTIDVAEGKLLKLPYNDTEDPWLVAHKFIEKHDLNPMFLD  
 QIANFIINNSKSAGVQAESMSEFSDPFTGASRYIPSNVGPSSLASNHGDNSSIQELPKSNPTGN  
 GDIEKASTGAHFLLTYVTFDTANTNGIRAKLCEFTEKIEKSQQLSIEKIEHMLLLLDYPQAITD  
 DQMLSLEKALSWPAEFVFPALDVLRLAVRAEPVNSRVSKDGGVGLINHLLRYVSTGNPVSNQ  
 MLVLRTLNFFVCPSGEQLLVSAKKVLSLTRSCASKNKHVQIALATLYANYSVAFQKSTSSE  
 DTYCKDMYLNDAVEALKQFNEPEALFRLIVCIGTAVQDKYCLQVAKALKIGEIVQSVLERCEV  
 SKIQDFGATLIDIVSN

|                                                                                                                            |
|----------------------------------------------------------------------------------------------------------------------------|
| Sequence inputSeq Length 775 residues                                                                                      |
| Cysteines in this sequence: 23                                                                                             |
| <b>Disulfide Connectivity prediction</b>                                                                                   |
| <b>Step 1:</b> Running <a href="#">PSI-BLAST</a> with input sequence; click <a href="#">here</a> to see the output         |
| <b>Step 2:</b> Predicting secondary structure using <a href="#">PSIPRED</a> ; click <a href="#">here</a> to see the output |
| <b>Step 3:</b> Disulfide Oxidation State Prediction; click <a href="#">here</a> to see the results                         |
| <b>Warning!</b> The number of predicted half-cystines is lower than 2.                                                     |
| <b>Step 4:</b> Disulfide Bonds Prediction using a trained Neural Network                                                   |

| <b>Step 5: Weighted matching</b>                                    |                              |
|---------------------------------------------------------------------|------------------------------|
| <b>Predicted bonds</b>                                              |                              |
| 10 - 88                                                             | EYHLMCSILAH - AGSNDCAIYGF    |
| 56 - 139                                                            | FTEEHCMRGAS - WHGQRCVATLS    |
| 68 - 179                                                            | FISSLCALPPS - WNNKGCERKFI    |
| 112 - 644                                                           | HSENVCALVAG - SNFFVCPSGEQ    |
| 204 - 259                                                           | LEFLSCSNDTT - WKENVCVQTIK    |
| 219 - 665                                                           | QTSGECLGIYT - SLTRSCCASKN    |
| 234 - 238                                                           | YVYDICLSSCR - ICLSSCREYFI    |
| 245 - 726                                                           | EYFISCSSEDQT - FRLIVCIGTAV   |
| 352 - 736                                                           | GQTQLCKVGNE - VQDKYCLQVAK    |
| 537 - 756                                                           | IRAKLCEFTEK - SVLERCEVSKI    |
| 666 - 699                                                           | LTRSCCASKNK - SEDTYCKDMYL    |
| <b>Predicted connectivity</b>                                       |                              |
| 1-4, 2-6, 3-7, 5-17, 9-14, 10-18, 11-12, 13-21, 15-22, 16-23, 19-20 |                              |
| <a href="#">Introduction</a>                                        | <a href="#">Instructions</a> |
| <a href="#">References</a>                                          | <a href="#">About</a>        |
| <a href="#">Help!</a>                                               | <a href="#">Contacts</a>     |
| © Boston College                                                    |                              |

**PhospholipaseD-1-Pverdolaga:**

MKILKFLGCLIWYQVCVADEVDWRRPVWNIAH MVNANYQIDYYLDMGANSIEFDVAFDNS  
 GNARFTFEGVPCDCFRSCVRHEEIEENYLEYMRHLTTPGDPKFQEKLVLLFM DLKVKGLSSRAR  
 TNAGFSIARKLVRHYWQNGTSAARAHVLM SIPSDHMEVVRGFRDGLRVEGLSGYINKVGV  
 DFGNEDLNSIRRALMSEISDRIWQGDGITNCLPRGTGRLREAIQRRDQPGLTHIEKVYWWTV  
 DKMSTMRTLRLSVDAMITNYPRLVSVLDEDEFSGRFRMATIDDNPWSKHELRTSALYALDE  
 GPTARGGNITTYFDKEDDELLIIASTITQTMAGINFTRGLEESIPX

|                                                                                                                            |
|----------------------------------------------------------------------------------------------------------------------------|
| Sequence inputSeq Length 358 residues                                                                                      |
| Cysteines in this sequence: 6                                                                                              |
| <b>Disulfide Connectivity prediction</b>                                                                                   |
| <b>Step 1:</b> Running <a href="#">PSI-BLAST</a> with input sequence; click <a href="#">here</a> to see the output         |
| <b>Step 2:</b> Predicting secondary structure using <a href="#">PSIPRED</a> ; click <a href="#">here</a> to see the output |
| <b>Step 3:</b> Disulfide Oxidation State Prediction; click <a href="#">here</a> to see the results                         |
| <b>Step 4:</b> Disulfide Bonds Prediction using a trained Neural Network                                                   |

|                                  |                           |
|----------------------------------|---------------------------|
| <b>Step 5:</b> Weighted matching |                           |
| <b>Predicted bonds</b>           |                           |
| 9 - 72                           | LKFLGCLIWYQ - FHGVPCDCFRS |
| 16 - 74                          | IWYQVCVADEV - GVPCDCFRSCV |
| 78 - 217                         | DCFRSCVRHEE - DGITNCLPRGT |
| <b>Predicted connectivity</b>    |                           |
| 1-3, 2-4, 5-6                    |                           |
| Introduction                     | Instructions              |
| References                       | About                     |
| Help!                            | Contacts                  |
| © Boston College                 |                           |

## Mature peptide disulfide pattern

Sequence **inputSeq** Length **332** residues

Cysteines in this sequence: **4**

**Disulfide Connectivity prediction**

**Step 1:** Running [PSI-BLAST](#) with input sequence; click [here](#) to see the output

**Step 2:** Predicting secondary structure using [PSIPRED](#); click [here](#) to see the output

**Step 3:** Disulfide Oxidation State Prediction; click [here](#) to see the results

**Step 4:** Disulfide Bonds Prediction using a trained Neural Network

**Step 5:** Weighted matching

**Predicted bonds**

|          |                           |
|----------|---------------------------|
| 47 - 49  | FHGVPCDCFRS - GVPDCFRSCV  |
| 53 - 192 | DCFRSCVRHEE - DGITNCLPRGT |

**Predicted connectivity**

1-2, 3-4

[Introduction](#)
[Instructions](#)
[References](#)
[About](#)
[Help!](#)
[Contacts](#)

© Boston College

## PhospholipaseD-2-Pverdolaga:

MANDISDAIYLLDQGANALEFDISFFNNGTVNRVYHGVP**C**DCFR**V**C**C**THEASLPDYLSIRKITD  
 PQTGKYSQQMTFQFFDLKLQEVTPWGKYVAGLEIANHVIDYLWGNDTKRQLVRVLFINDES  
 DKDVVLGVRNAFLQRGMKKFLDQVGFDGGTGTMKSIKSDMWDSLGRGNLWQGDGIFN**C**LS  
 EVYKDDRLREALHIRDSPNGFIDKVYHWTIDSRGRMRMSLRLGVDGMITNLPKDLIDVLNEDP  
 YSNIFRLATAKDDPFSRFHPSKSFK

Sequence **inputSeq** Length **275** residues

Cysteines in this sequence: **4**

**Disulfide Connectivity prediction**

**Step 1:** Running [PSI-BLAST](#) with input sequence; click [here](#) to see the output

**Step 2:** Predicting secondary structure using [PSIPRED](#); click [here](#) to see the output

**Step 3:** Disulfide Oxidation State Prediction; click [here](#) to see the results

**Step 4:** Disulfide Bonds Prediction using a trained Neural Network

**Step 5: Weighted matching**

| Predicted bonds |                           |
|-----------------|---------------------------|
| 40 - 184        | YHGVPCDCFRV - DGIFNCLSEVY |
| 42 - 46         | GVPCDCFRVCT - DCFRVCTHEAS |

**Predicted connectivity**

1-4, 2-3

[Introduction](#)
[Instructions](#)
[References](#)
[About](#)
[Help!](#)
[Contacts](#)

© Boston College

#### PhospholipaseD-3-Pverdolaga:

EKRSGGYAVTSFVKSFGRIFTECCGNWKTRWLLVKDNFVAYIKPSDGQLKC VLLMDHDFSVK  
 SGKAETGKSNLSFISNMSRHLRLKCRSERQATEWAAEIERVVEKSGFEFTKVS RHG SFAPPRPH  
 SPCRWIIDGATYFDSVASALDRAKEEIFIADWWLTPEIYLKRPTFHGHYWQLDHILK

Sequence inputSeq Length 184 residues

Cysteines in this sequence: 5

**Disulfide Connectivity prediction**

**Step 1:** Running [PSI-BLAST](#) with input sequence; click [here](#) to see the output

**Step 2:** Predicting secondary structure using [PSIPRED](#); click [here](#) to see the output

**Step 3:** Disulfide Oxidation State Prediction; click [here](#) to see the results

Warning! The number of predicted half-cystines is lower than 2.

**Step 4:** Disulfide Bonds Prediction using a trained Neural Network

**Step 5: Weighted matching**

| Predicted bonds |                           |
|-----------------|---------------------------|
| 24 - 51         | IFTECCGNWKT - DGQLKCVLLMD |
| 87 - 129        | HLRLKCRSERQ - RPHSPCRWIID |

**Predicted connectivity**

2-3, 4-5

[Introduction](#)
[Instructions](#)
[References](#)
[About](#)
[Help!](#)
[Contacts](#)

© Boston College

**PhospholipaseD-4-Pverdolaga:**

XALPISKLDIKRHTSSIVPPPLFPVHKRSRSDSNVMTVPKKNQEFYQSRPHDDYHIKTLLKNIPS  
 KPQQPVHKLQAKVKHDENRAKQRWRVAVKKIQAISAFQNLESQVLLEQVRDGAHQDVCLS  
 SLPTPADVHRTIQEIALVHLGLERTYRLWHGKDYSNFIFKDLNKLNEPYTDSVNRYETPRMP  
 WHDVS CFLQGPAARDVARHFIQRWNFTKLRTAKFDDVYPLLLPKCYEFPDPIPPILSSEVGSIL  
 MADCQVLRSTSMWSAGIITTEYSILNAYKDAIMKAEHFIYIENQFFVSLQHGKNDVFNDISEC  
 LYQRIMKAHQENKRFVYVIMPLLPAPFEGEVGTGTGTLIQAVTHWNYSSICRGPRSLCQRLA  
 KSIQDPLSYISFYGLRNFGVLNNKLVTIELYVHSLKMIVDDKKAIGSANINDRSLLGRRDSEIA  
 VLVNDSVFVESVMDGKPYKAGHFCSSLRKALFKEHLGLLGEKHSKVEX

Sequence inputSeq Length 490 residues

Cysteines in this sequence: 9

**Disulfide Connectivity prediction**

**Step 1:** Running [PSI-BLAST](#) with input sequence; click [here](#) to see the output

**Step 2:** Predicting secondary structure using [PSIPRED](#); click [here](#) to see the output

**Step 3:** Disulfide Oxidation State Prediction; click [here](#) to see the results

Warning! The number of predicted half-cysteines is lower than 2.

**Step 4:** Disulfide Bonds Prediction using a trained Neural Network

**Step 5: Weighted matching****Predicted bonds**

|           |                           |
|-----------|---------------------------|
| 123 - 193 | AHQDVCLSSLP - WHDVSCFLQGP |
| 232 - 255 | LLLPKCYEFPD - ILMADCQVLR  |
| 314 - 330 | NDISECLYQRI - ENKRFCVYVIM |
| 365 - 372 | NYSSICRGPRS - GPRSLCQRLAK |

**Predicted connectivity**

1-2, 3-4, 5-6, 7-8

[Introduction](#)

[Instructions](#)

[References](#)

[About](#)

[Help!](#)

[Contacts](#)

© Boston College

**PhospholipaseB-1-Pverdolaga:**

LEAIVLSLFRDNVVFYGVFAPPRLVSASCSSVSLCMKNLSPEASDWKFCMMLTLWVAIALLV  
 HVCAASTEQAAYVTWDSSSYKFTVHSDPVENFVAYATFTNEINATGWSYLEVWTNETFPDSV  
 QAYSAGLAEGVLTADLLKKHWYNTVATYCDGEESYCDRLKIFLETNLD FMNYNIARRRKYV  
 PYWHQVALALEQLSGLEDGYNNVSGKPHTKLNVTGVL MVNIFGDLEDLEGILNKTVSSRPL  
 GSGSCGLIKVLPNNEDLYVSQDSWNTYSSMLRVLKKYNISVHSGMDRGSPVIPGQVMSFSSY  
 PGLICSGDDFYTISSGLATMETTIGNGNSSLWKYIRAKGTVLEWLSIVANRMARSGREWSRW  
 F SIMNSGTYNQWMVVDYNKFLPGAPLQNDLLWVLEQLPGYIHSDDLTDVLRKQGYWPSY  
 NTPYFKDIFNLSGSQENADKYGDWFTYDKTPRALIFKRDHGTVDVKSMIKLMRYNDYTHD  
 PLSRCNCTPPYSAENAISARCDLNPANGTYPFGALGHRSHGGIDMKLTTGSLFKNFEFVAFG  
 GPTYDSLPPFKWSESDFRITTERHEGHPDLWKFEPIVRKWSQ

Sequence inputSeq Length 598 residues

Cysteines in this sequence: 11

**Disulfide Connectivity prediction**

**Step 1:** Running [PSI-BLAST](#) with input sequence; click [here](#) to see the output

**Step 2:** Predicting secondary structure using [PSIPRED](#); click [here](#) to see the output

**Step 3:** Disulfide Oxidation State Prediction; click [here](#) to see the results

**Step 4:** Disulfide Bonds Prediction using a trained Neural Network

**Step 5: Weighted matching****Predicted bonds**

|           |                           |
|-----------|---------------------------|
| 30 - 252  | IVSASCSSVSL - LGSGSCSGLIK |
| 36 - 315  | SSVSLCMKNLS - YPGLICSGDDF |
| 50 - 499  | SDWKFCMMLTL - DPLSRCNCTPP |
| 66 - 161  | LLVHVCAASTE - GEESYCDRLKI |
| 501 - 515 | LSRCNCTPPYS - AISARCDLNPA |

**Predicted connectivity**

1-7, 2-8, 3-9, 4-6, 10-11

[Introduction](#)

[Instructions](#)

[References](#)

[About](#)

[Help!](#)

[Contacts](#)

© Boston College



**Kunitz-1-Pverdolaga:**

MGIRNICIVISVFTVLFVLTVPVFSADKMDICKLPPESCIIDLRAQLKIPRWYFNGRLCTRFVYS  
GCDASENNFISRAQCRAKCGQARRRIRVPKT

|                                                                                                                            |                              |
|----------------------------------------------------------------------------------------------------------------------------|------------------------------|
| Sequence inputSeq Length 99 residues                                                                                       |                              |
| Cysteines in this sequence: 7                                                                                              |                              |
| Disulfide Connectivity prediction                                                                                          |                              |
| <b>Step 1:</b> Running <a href="#">PSI-BLAST</a> with input sequence; click <a href="#">here</a> to see the output         |                              |
| <b>Step 2:</b> Predicting secondary structure using <a href="#">PSIPRED</a> ; click <a href="#">here</a> to see the output |                              |
| <b>Step 3:</b> Disulfide Oxidation State Prediction; click <a href="#">here</a> to see the results                         |                              |
| <b>Step 4:</b> Disulfide Bonds Prediction using a trained Neural Network                                                   |                              |
| <b>Step 5:</b> Weighted matching                                                                                           |                              |
| <b>Predicted bonds</b>                                                                                                     |                              |
| 7 - 69                                                                                                                     | GIRNICIVISV - FVYSGCDASEN    |
| 34 - 86                                                                                                                    | EKMDICKLPPE - QCRAKCGQARR    |
| 61 - 82                                                                                                                    | FNGRLCTRFVY - ISRAQCRAKCG    |
| <b>Predicted connectivity</b>                                                                                              |                              |
| 1-5, 2-7, 4-6                                                                                                              |                              |
| <a href="#">Introduction</a>                                                                                               | <a href="#">Instructions</a> |
| <a href="#">References</a>                                                                                                 | <a href="#">About</a>        |
| <a href="#">Help!</a>                                                                                                      | <a href="#">Contacts</a>     |
| © Boston College                                                                                                           |                              |

**Kunitz-2-Pverdolaga:**

MGVRTVFLLFVAFSFAAGDLQNPIRDEVCSLKAEPGIPGKNIMCLAYFPKYFNSAVGYCEKFI  
 FGGCGGNANSFSTKEECEFCSDDKR

|                                                                                                                            |  |
|----------------------------------------------------------------------------------------------------------------------------|--|
| Sequence inputSeq Length 92 residues                                                                                       |  |
| Cysteines in this sequence: 6                                                                                              |  |
| <b>Disulfide Connectivity prediction</b>                                                                                   |  |
| <b>Step 1:</b> Running <a href="#">PSI-BLAST</a> with input sequence; click <a href="#">here</a> to see the output         |  |
| <b>Step 2:</b> Predicting secondary structure using <a href="#">PSIPRED</a> ; click <a href="#">here</a> to see the output |  |
| <b>Step 3:</b> Disulfide Oxidation State Prediction; click <a href="#">here</a> to see the results                         |  |
| <b>Step 4:</b> Disulfide Bonds Prediction using a trained Neural Network                                                   |  |

  

|                                  |                              |
|----------------------------------|------------------------------|
| <b>Step 5:</b> Weighted matching |                              |
| <b>Predicted bonds</b>           |                              |
| 29 - 85                          | IRDEVCSLKAEE - ECEKFCGSDDK   |
| 44 - 68                          | GKNIMCLAYFP - FIFGGCGGNAN    |
| 60 - 81                          | SAVGYCEKFIF - STKEECEKFCG    |
| <b>Predicted connectivity</b>    |                              |
| 1-6, 2-4, 3-5                    |                              |
| <a href="#">Introduction</a>     | <a href="#">Instructions</a> |
| <a href="#">References</a>       | <a href="#">About</a>        |
| <a href="#">Help!</a>            | <a href="#">Contacts</a>     |
| © Boston College                 |                              |

**Kunitz-3-Pverdolaga:**

MGIRNICSVISVFTVLFALTFPVFLAGYHLDICRQRPDRGMCLVNMERWFFNGRFCSTFVYGG  
CGGNGNNFISKAQCMARCAARG

Sequence inputSeq Length 86 residues

Cysteines in this sequence: 7

**Disulfide Connectivity prediction**

**Step 1:** Running [PSI-BLAST](#) with input sequence; click [here](#) to see the output

**Step 2:** Predicting secondary structure using [PSIPRED](#); click [here](#) to see the output

**Step 3:** Disulfide Oxidation State Prediction; click [here](#) to see the results

**Step 4:** Disulfide Bonds Prediction using a trained Neural Network

**Step 5:** Weighted matching

**Predicted bonds**

|         |                           |
|---------|---------------------------|
| 34 - 82 | YHLDICRQRPD - QCMARCARGXX |
| 43 - 65 | PDRGMCLVNME - FVYGGCGGNGN |
| 57 - 78 | FNGRFCSTFVY - ISKAQCMARCA |

**Predicted connectivity**

2-7, 3-5, 4-6

[Introduction](#)
[Instructions](#)
[References](#)
[About](#)
[Help!](#)
[Contacts](#)

© Boston College

**Mature peptide disulfide pattern**

**Step 5:** Weighted matching

**Predicted bonds**

|         |                           |
|---------|---------------------------|
| 7 - 55  | YHLDICRQRPD - QCMARCARGXX |
| 16 - 38 | PDRGMCLVNME - FVYGGCGGNGN |
| 30 - 51 | FNGRFCSTFVY - ISKAQCMARCA |

**Predicted connectivity**

1-6, 2-4, 3-5

[Introduction](#)
[Instructions](#)
[References](#)
[About](#)
[Help!](#)
[Contacts](#)

© Boston College

**Kunitz-4-Pverdolaga:**

MLLMILVVASFQHSNADANGIDLCELDKEPGSCTSVINRYFFNRYSRRCERFIYTDCCGGNSNNF  
 HYEFECCERTCPGDLYIGDVCSLPKKVGPCRAAMPRIYFNKETGRCEFTYGGCSGNYNNFETK  
 EQCNSYCFQG

Sequence inputSeq Length 138 residues

Cysteines in this sequence: 12

### Disulfide Connectivity prediction

**Step 1:** Running [PSI-BLAST](#) with input sequence; click [here](#) to see the output

**Step 2:** Predicting secondary structure using [PSIPRED](#); click [here](#) to see the output

**Step 3:** Disulfide Oxidation State Prediction; click [here](#) to see the results

**Step 4:** Disulfide Bonds Prediction using a trained Neural Network

### Step 5: Weighted matching

#### Predicted bonds

|           |                            |
|-----------|----------------------------|
| 24 - 74   | NGIDLCELDKE - ECERTCPGDLY  |
| 33 - 57   | KEPGSCTSVIN - FIYTDCCGGNSN |
| 49 - 70   | RYSRRCERFIY - HYEFECCERTCP |
| 84 - 134  | YIGDVCSLPKK - QCNSYCFQGXX  |
| 93 - 117  | KKVGPCRAAMP - FTYGGCSGNYN  |
| 109 - 130 | KETGRCEFTY - ETKEQCNSYCF   |

#### Predicted connectivity

1-6, 2-4, 3-5, 7-12, 8-10, 9-11

[Introduction](#)

[Instructions](#)

[References](#)

[About](#)

[Help!](#)

[Contacts](#)

© Boston College

**Kunitz-5-Pverdolaga:**

XYFLRNGCPSSSTVCETTHSLGISRGNCCDSINCHLIAKFPNXAEMHFTLACVFSLFCGICFANH  
 NVPDTDCLPPDAGMCYAYFPMFFYDAPSGACINFIYGGCGGNANRFWTEEECMNRCAGVG  
 GTTKEPADEEKGPVDEGKGTISQKPIDEGKEVIIQKPVDEGKGAIYPQPTGGGKGVIFPQ  
 PVAGGKGVIFQQPVGGGKGVTVQHAPQADICNQEKGQPGNCSSQIIRYFDKDSKKCDTFMYS  
 GCGKNDNNFNKYKFCERTCSGEHDIGDTCNFKQDSGPCRAFFPRFYFSGESGQCEQFIYGGCQ  
 GNHNFKTKEECLQFCTSGKGSPLP

Sequence inputSeq Length 342 residues

Cysteines in this sequence: 26

### Disulfide Connectivity prediction

**Step 1:** Running [PSI-BLAST](#) with input sequence; click [here](#) to see the output

**Step 2:** Predicting secondary structure using [PSIPRED](#); click [here](#) to see the output

**Step 3:** Disulfide Oxidation State Prediction; click [here](#) to see the results

**Step 4:** Disulfide Bonds Prediction using a trained Neural Network

### Step 5: Weighted matching

#### Predicted bonds

|           |                            |
|-----------|----------------------------|
| 8 - 122   | FLRNGCPSSSTV - ECMNRCAGVGG |
| 14 - 72   | PSSTVCETTHS - VPDTDCSLPPD  |
| 27 - 255  | ISRGNCCDSIN - FMYSGCGKNDN  |
| 28 - 52   | SRGNCCDSINS - HFTLACVFSLF  |
| 34 - 58   | DSINCHLIAK - VFSLFCGICFA   |
| 61 - 268  | LFCGICFANH - NYKFECERTCS   |
| 81 - 105  | PDAGMCYAYFP - FIYGGCGGNAN  |
| 97 - 118  | APSGACINFIY - WTEEECMNRCA  |
| 222 - 272 | PQADICNQEKG - ECERTCSGEHD  |
| 231 - 315 | KQPGNCSSQII - FIYGGCQGNHN  |
| 247 - 291 | KDSKKCDTFMY - QDSGPCRAFFP  |
| 282 - 332 | DIGDTCNFKQD - ECLQFCTSGKG  |
| 307 - 328 | GESGQCEQFIY - KTKEECLQFCT  |

#### Predicted connectivity

1-14, 2-9, 3-18, 4-6, 5-7, 8-19, 10-12, 11-13, 15-20, 16-24, 17-22, 21-26, 23-25

[Introduction](#)

[Instructions](#)

[References](#)

[About](#)

[Help!](#)

[Contacts](#)

© Boston College

**Kunitz-6-Pverdolaga:**

VISVFTVLLALTFPPLFSADHHLDI<sup>C</sup>ELPADSGT<sup>C</sup>CVRLHRWYFNGES<sup>C</sup>TKFLYRG<sup>C</sup>GGNENHF  
MTEVE<sup>C</sup>MAK<sup>C</sup>CGGA

|                                                                                                                            |                              |
|----------------------------------------------------------------------------------------------------------------------------|------------------------------|
| Sequence inputSeq Length 78 residues                                                                                       |                              |
| Cysteines in this sequence: 6                                                                                              |                              |
| Disulfide Connectivity prediction                                                                                          |                              |
| <b>Step 1:</b> Running <a href="#">PSI-BLAST</a> with input sequence; click <a href="#">here</a> to see the output         |                              |
| <b>Step 2:</b> Predicting secondary structure using <a href="#">PSIPRED</a> ; click <a href="#">here</a> to see the output |                              |
| <b>Step 3:</b> Disulfide Oxidation State Prediction; click <a href="#">here</a> to see the results                         |                              |
| <b>Step 4:</b> Disulfide Bonds Prediction using a trained Neural Network                                                   |                              |
| <b>Step 5:</b> Weighted matching                                                                                           |                              |
| <b>Predicted bonds</b>                                                                                                     |                              |
| 26 - 74                                                                                                                    | HHLDICELPAD - ECMACGGAXX     |
| 35 - 57                                                                                                                    | ADSGTCFVRLH - FLYRGCGGNEN    |
| 49 - 70                                                                                                                    | FNGESCTKFLY - MTEVECMACG     |
| <b>Predicted connectivity</b>                                                                                              |                              |
| 1-6, 2-4, 3-5                                                                                                              |                              |
| <a href="#">Introduction</a>                                                                                               | <a href="#">Instructions</a> |
| <a href="#">References</a>                                                                                                 | <a href="#">About</a>        |
| <a href="#">Help!</a>                                                                                                      | <a href="#">Contacts</a>     |
| © Boston College                                                                                                           |                              |

**Kunitz-7-Pverdolaga:**

XTSCCKGIKESCTLDRAEAKEICMMPKEIGPCRGYFHRWYFDVNTLTCTVTFVYGGCRGNNNNF  
EFQRDCVVRTCEPLFKASGNEDPSNVSTHDVAQGNSPIDCMVTPWX

Sequence inputSeq Length 108 residues

Cysteines in this sequence: 9

**Disulfide Connectivity prediction**

**Step 1:** Running [PSI-BLAST](#) with input sequence; click [here](#) to see the output

**Step 2:** Predicting secondary structure using [PSIPRED](#); click [here](#) to see the output

**Step 3:** Disulfide Oxidation State Prediction; click [here](#) to see the results

**Step 4:** Disulfide Bonds Prediction using a trained Neural Network

**Step 5:** Weighted matching

**Predicted bonds**

|          |                            |
|----------|----------------------------|
| 11 - 101 | GIKESCTLDRA - NSPIDCMVTPW  |
| 22 - 72  | EAKEICMMPKE - DCVRTCEPLFK  |
| 31 - 55  | KEIGPCRGYFH - FVYGGCRGNNN  |
| 47 - 68  | VNTLTCTVTFVY - EFQRDCVRTCE |

**Predicted connectivity**

2-9, 3-8, 4-6, 5-7

[Introduction](#)
[Instructions](#)
[References](#)
[About](#)
[Help!](#)
[Contacts](#)

© Boston College

**Kunitz-8-Pverdolaga:**

DAGTCFASIPRWYFTGSKCRSFIYGGCGGNANNFDTELXMPKEMWKEMKRVTSHFTTETGTA  
QNPSSGYLEVFEVRIV

Sequence inputSeq Length 80 residues

Cysteines in this sequence: 3

Disulfide Connectivity prediction

Step 1: Running PSI-BLAST with input sequence; click [here](#) to see the output

Step 2: Predicting secondary structure using PSIPRED; click [here](#) to see the output

Step 3: Disulfide Oxidation State Prediction; click [here](#) to see the results

Step 4: Disulfide Bonds Prediction using a trained Neural Network

Disulfide bond scores

| Cysteine sequence position | Distance | Bond                    | Score   |
|----------------------------|----------|-------------------------|---------|
| 5 - 19                     | 14       | XDAGTCFASIP-FTGSKCRSFIY | 0.0108  |
| 5 - 27                     | 22       | XDAGTCFASIP-FIYGGCGGNAN | 0.99974 |
| 19 - 27                    | 8        | FTGSKCRSFIY-FIYGGCGGNAN | 0.01567 |

Step 5: Weighted matching

Predicted bonds

|        |                           |
|--------|---------------------------|
| 5 - 27 | XDAGTCFASIP - FIYGGCGGNAN |
|--------|---------------------------|

Predicted connectivity

1-3

[Introduction](#)
[Instructions](#)
[References](#)
[About](#)
[Help!](#)
[Contacts](#)

© Boston College



**Kunitz-9-Pverdolaga:**

QVATLHPPEAEKENLRNYVQRFTGVVMKSSLGVCELEKNSGPCAASYKRWYYDAISKDCLP  
FSYGGCLGNENRFRRTKAACEETCKN

|                                                                                                                            |                              |
|----------------------------------------------------------------------------------------------------------------------------|------------------------------|
| Sequence inputSeq Length 88 residues                                                                                       |                              |
| Cysteines in this sequence: 6                                                                                              |                              |
| Disulfide Connectivity prediction                                                                                          |                              |
| <b>Step 1:</b> Running <a href="#">PSI-BLAST</a> with input sequence; click <a href="#">here</a> to see the output         |                              |
| <b>Step 2:</b> Predicting secondary structure using <a href="#">PSIPRED</a> ; click <a href="#">here</a> to see the output |                              |
| <b>Step 3:</b> Disulfide Oxidation State Prediction; click <a href="#">here</a> to see the results                         |                              |
| <b>Step 4:</b> Disulfide Bonds Prediction using a trained Neural Network                                                   |                              |
| <b>Step 5:</b> Weighted matching                                                                                           |                              |
| <b>Predicted bonds</b>                                                                                                     |                              |
| 35 - 85                                                                                                                    | SSLGVCELEKN - ACEETCKNXXX    |
| 44 - 68                                                                                                                    | KNSGPCAASYK - FSYGGCLGNEN    |
| 60 - 81                                                                                                                    | AISKDCLPFSY - RTKAACEETCK    |
| <b>Predicted connectivity</b>                                                                                              |                              |
| 1-6, 2-4, 3-5                                                                                                              |                              |
| <a href="#">Introduction</a>                                                                                               | <a href="#">Instructions</a> |
| <a href="#">References</a>                                                                                                 | <a href="#">About</a>        |
| <a href="#">Help!</a>                                                                                                      | <a href="#">Contacts</a>     |
| © Boston College                                                                                                           |                              |

**Kunitz-10-Pverdolaga:**

XLKLPPKMMKLLWVNLLLLVLATCLCSEKTDKTNNGICNQRMDSGNGNQIRITHFYDYDTGRQ  
KCHFPYPYSGRGGNKNFSTMQECKKRMPP

Sequence **inputSeq** Length 90 residues

Cysteines in this sequence: 5

**Disulfide Connectivity prediction**

**Step 1:** Running [PSI-BLAST](#) with input sequence; click [here](#) to see the output

**Step 2:** Predicting secondary structure using [PSIPRED](#); click [here](#) to see the output

**Step 3:** Disulfide Oxidation State Prediction; click [here](#) to see the results

Warning! The number of predicted half-cystines is lower than 2.

**Step 4:** Disulfide Bonds Prediction using a trained Neural Network

**Step 5:** Weighted matching

| Predicted bonds |                             |
|-----------------|-----------------------------|
| 26 - 38         | LATCLCSEKTD - TNNGICNQRMD   |
| 63 - 84         | TGRQKCHFPYPY - STMQECKKRMPP |

**Predicted connectivity**

2-3, 4-5

[Introduction](#)
[Instructions](#)
[References](#)
[About](#)
[Help!](#)
[Contacts](#)

© Boston College

**Kunitz-11-Pverdolaga:** MRKSIMGTQVQGFRSSSPGALMSRVMASTTLCCFFSGKVYLQA

No disulfide bonds are possible for this sequence, the prediction will not be attempted

[Clote's structural bioinformatics Lab](#) - [Author's homepage](#)

**Kunitz-12-Pverdolaga:**

MLLRNDVSRRRIMIKVSRQRFSLTDFLEDFTAKDENNTDCQTLPA GDPTCYDNCMPFYD  
TSSSTCMNVEYGGCGGKANRFWTEKECTDQCKNKEDDVANGAASEYSGIVSWLKVKYSPFL

|                                                                                                                            |                              |
|----------------------------------------------------------------------------------------------------------------------------|------------------------------|
| Sequence inputSeq Length 124 residues                                                                                      |                              |
| Cysteines in this sequence: 8                                                                                              |                              |
| Disulfide Connectivity prediction                                                                                          |                              |
| <b>Step 1:</b> Running <a href="#">PSI-BLAST</a> with input sequence; click <a href="#">here</a> to see the output         |                              |
| <b>Step 2:</b> Predicting secondary structure using <a href="#">PSIPRED</a> ; click <a href="#">here</a> to see the output |                              |
| <b>Step 3:</b> Disulfide Oxidation State Prediction; click <a href="#">here</a> to see the results                         |                              |
| <b>Step 4:</b> Disulfide Bonds Prediction using a trained Neural Network                                                   |                              |
| <b>Step 5:</b> Weighted matching                                                                                           |                              |
| <b>Predicted bonds</b>                                                                                                     |                              |
| 32 - 94                                                                                                                    | DLEDFCTAKDE - ECTDQCKNKED    |
| 42 - 69                                                                                                                    | ENNTDCQTLPA - TSSSTCMNVEY    |
| 52 - 77                                                                                                                    | AGDPTCYDNC - VEYGGCGGKAN     |
| 57 - 90                                                                                                                    | CYDNCMPFY - WTEKECTDQCK      |
| <b>Predicted connectivity</b>                                                                                              |                              |
| 1-8, 2-5, 3-6, 4-7                                                                                                         |                              |
| <a href="#">Introduction</a>                                                                                               | <a href="#">Instructions</a> |
| <a href="#">References</a>                                                                                                 | <a href="#">About</a>        |
| <a href="#">Help!</a>                                                                                                      | <a href="#">Contacts</a>     |
| © Boston College                                                                                                           |                              |

**Kunitz-13-Pverdolaga:**

MGIARIFSVVSLFSVFLALTFPPLFSADHHEGTDICYLPPERGVCKAYSEQWHFNGRRCAKFVF  
GGCGGNANRFPTKDECIIRRCRKA

Sequence **inputSeq** Length **87** residues

Cysteines in this sequence: **6**

### Disulfide Connectivity prediction

**Step 1:** Running [PSI-BLAST](#) with input sequence; click [here](#) to see the output

**Step 2:** Predicting secondary structure using [PSIPRED](#); click [here](#) to see the output

**Step 3:** Disulfide Oxidation State Prediction; click [here](#) to see the results

**Step 4:** Disulfide Bonds Prediction using a trained Neural Network

### **Step 5:** Weighted matching

#### Predicted bonds

|         |                           |
|---------|---------------------------|
| 36 - 84 | EGTDICYLPPE - ECIRRCRKAXX |
| 45 - 67 | PERGVCKAYSE - FVFGGCGGNAN |
| 59 - 80 | FNGRRCAKFVF - PTKDECIRRCR |

#### Predicted connectivity

1-6, 2-4, 3-5

[Introduction](#)

[Instructions](#)

[References](#)

[About](#)

[Help!](#)

[Contacts](#)

© Boston College

**Amino acid sequences of Hyaluronidases translated from *Pamphobeteus verdolaga*.** Yellow highlighted residues indicate the cysteine position on hyaluronidase-like sequence (Cys17, Cys176, Cys183, Cys196, Cys218, Cys307, Cys332, Cys337, Cys343, Cys372, Cys374 and Cys383).

**Hyaluronidase-1-Pverdolaga:**

PRMYQSKLLQGLFPNSKDLPLDSVLLLDSEGA VKVIGH SRLSRVLEDNRG CWIASVIISKEKRG  
QGLGKFLMMKTEEYAKVLGLTTAYLNTRDKQGFYEH LGYSY CNPVSPHKGSFSMNGVGHLS  
NFHRQVLRRC EEGETNHSGSPVGD PKIAKSSSVSSAKTSTPPLPPPPPPPPSSNVKTD CFTSATG  
HNWMKKYL

Sequence inputSeq Length 199 residues
Cysteines in this sequence: 4
Disulfide Connectivity prediction
Step 1: Running PSI-BLAST with input sequence; click [here](#) to see the output
Step 2: Predicting secondary structure using PSIPRED; click [here](#) to see the output
Step 3: Disulfide Oxidation State Prediction; click [here](#) to see the results
Warning! The number of predicted half-cystines is lower than 2.
Step 4: Disulfide Bonds Prediction using a trained Neural Network

Step 5: Weighted matching

| Predicted bonds |                            |
|-----------------|----------------------------|
| 51 - 135        | EDNRGCWIASV - QVLRRC EEGET |
| 106 - 185       | LGYSYCNFVSP - NVKTD CFTSAT |

| Predicted connectivity |  |
|------------------------|--|
| 1-3, 2-4               |  |

Introduction
Instructions
References
About
Help!
Contacts

© Boston College

**Hyaluronidase-2-Pverdolaga:**

MSVTLFLLLLLPCYTRQAEDPTVFTVRWNVPTIQCRKTYGMDFVPLLKSYGILVNSGDEFKGEV  
 NTIFYESQLGLYPHLDQSGQRVNGGIPQLGDLPEHLKNAREDINKAIPDINFNGLGIIDWESWR  
 PVWNFNWVGALKKYQDESFQEALKQHPGWTNDSLWQLAQQEWETSAKNFMLETLRLAQTM  
 RPNLWLCYYLFPDCYNYNGQTPREFRCPISIVVTGNNQLSWLWHESKAVCPSLYVADGYLQKY  
 TFEQRTWYVDGRLKEALRVAPNSQLYPYIGYGYGVTPGAMVPEDDFWRILAQVASAGSSGTVI  
 WGASATLRSKDNCQLLQKYVKDILGPSVTIVKENAERCAKTMNGKGRCTWLNDPNVIAWR  
 VYLDNRNKHPPQRSEITCHVEGYSGRYCDVQRRVINQTKLRVSFKLSLDLYTYLRRLLDN

Sequence inputSeq Length 432 residues

Cysteines in this sequence: 13

**Disulfide Connectivity prediction**

**Step 1:** Running [PSI-BLAST](#) with input sequence; click [here](#) to see the output

**Step 2:** Predicting secondary structure using [PSIPRED](#); click [here](#) to see the output

**Step 3:** Disulfide Oxidation State Prediction; click [here](#) to see the results

**Step 4:** Disulfide Bonds Prediction using a trained Neural Network

**Step 5: Weighted matching****Predicted bonds**

|           |                           |
|-----------|---------------------------|
| 13 - 392  | LLLLPCYTRQA - EITCHVEGYSG |
| 35 - 236  | VPTIQCRKTYG - ESKAVCPSLYV |
| 194 - 201 | PNSLWCYYLFP - YLFPDCYNYNG |
| 214 - 325 | PREFRCPSIVV - RSKDNCQLLQK |
| 350 - 361 | ENAERCAKTCM - NGKGRCTWLND |
| 355 - 390 | CAKTCMNGKGR - RSEITCHVEG  |

**Predicted connectivity**

1-12, 2-6, 3-4, 5-7, 8-10, 9-11

[Introduction](#)

[Instructions](#)

[References](#)

[About](#)

[Help!](#)

[Contacts](#)

© Boston College
